# Supplementary material for: The first asymmetric total synthesis of (+)-coriandrone A and B
Source: Royal Society of Chemistry journal article supplement (doi:10.1039/c3ob41497c), 2013-01-01
Supplement: c3ob41497c.pdf [file c3ob41497c.pdf]

# **The First Asymmetric Total Synthesis of (+)-Coriandrone A and B**

**Wenjing Wang, Jijun Xue,\* Tian Tian, Yingdong Jiao and Ying Li\***

State Key Laboratory of Applied Organic Chemistry, College of Chemistry and  
Chemical Engineering, Lanzhou University, Lanzhou, 730000, P. R. China

[xuejj@lzu.edu.cn](mailto:xuejj@lzu.edu.cn) [liying@lzu.edu.cn](mailto:liying@lzu.edu.cn)

## **Supporting Information**

### **List of contents**

|                                                   |       |
|---------------------------------------------------|-------|
| 1. Materials and General Information.....         | 2     |
| 2. Procedures for the synthesis of compounds..... | 2-9   |
| 3. Copies of NMR and HPLC Spectra.....            | 10-35 |

## 1. Materials and General information

$\text{CH}_2\text{Cl}_2$  was dried by distillation over  $\text{CaH}_2$ , and THF was dried by distillation over Na/K. Other chemicals were used as received, and all reactions conducted under standard conditions were monitored by thin-layer chromatography (TLC) on gel F254 plates. The silica gel (200-300 meshes) was used for column chromatography.  $^1\text{H}$  and  $^{13}\text{C}$  spectra were recorded on Bruker AM-400 MHz instruments, and spectral data were reported in ppm relative to tetramethylsilane (TMS) as internal standard. Mass spectra (MS) were measured on spectrometer by direct inlet at 70 eV, and signals were given in  $m/z$  with relative intensity (%) in brackets. HRMS data were determined on a Bruker Daltonics APEXII 47e FT-ICR spectrometer. Optical rotations were measured using sodium D line on a Perkin Elmer 341 polarimeter. The enantiomeric excess values were determined by chiral stationary phase HPLC analysis (IB-3 10U 250×4.6 M, hexane: 2-propanol 85:15, flow rate 1 mL/min, detected at 236.0 nm on a Prostar 330 detector).

## 2. Procedures for the synthesis of compounds

### Methyl 4-methoxy-2-((2-methylbut-3-yn-2-yl)oxy)benzoate (5)

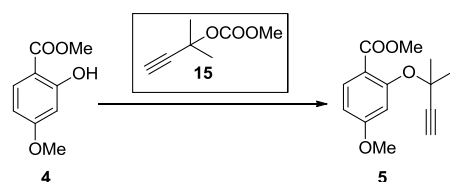

The phenol **4** (2.40 g, 13.49 mmol) was dissolved in  $\text{CH}_3\text{CN}$  (50 mL) and cooled to 0 °C. Commercially available  $\text{CuCl}_2 \cdot 2\text{H}_2\text{O}$  (56.7 mg, 0.42 mmol) is then added with 1, 1-dimethyl-prop-2-ynyl methyl carbonate **15** (2.90 g, 20.4 mmol). The reaction mixture was stirred for 15 min before the addition of commercially available DBU (2.6 mL, 21.0 mmol) via syringe. The reaction mixture remains at 0 °C for 1 hour and was allowed to warm to 38 °C for 6 h. The volatile organics are removed under reduced pressure and the resulting oil was diluted with EtOAc (150 mL). The organic solution was washed sequentially with 1M HCl (50 mL), water (50 mL) and brine (50 mL). The organic layer was dried over  $\text{Na}_2\text{SO}_4$ , filtered and concentrated in vacuo. The resulting brown oil was purified by flash silica gel chromatography (Petroleum ether/EtOAc 16: 1) to afford the desired aryl ether **5** (2.31 g, 68 %) as a colorless oil.  $^1\text{H}$  NMR (400 MHz,  $\text{CDCl}_3$ , ppm):  $\delta$  7.81 (d,  $J$  = 8.4 Hz, 1H), 7.16 (d,  $J$  = 2.4 Hz, 1H), 6.28 (q,  $J$  = 2.4 Hz,  $J$  = 8.8 Hz, 1H), 3.84 (s, 3H), 3.82 (s, 3H), 2.59 (s, 1H), 1.68 (s, 6H);  $^{13}\text{C}$  NMR (100 MHz,  $\text{CDCl}_3$ , ppm):  $\delta$  166.5, 163.05, 157.3, 132.9, 117.2, 108.4, 107.7, 86.2., 74.0, 73.8, 55.4, 51.5, 29.2; MS (EI)  $m/z$  (%): 248 ( $\text{M}^+$ , 1), 233 (1), 217 (2), 189 (4), 122 (29), 150 (100), 107 (21), 79 (17), 67 (39), 51 (26), 41 (36)

### The Preparation of Compound 3 and 6

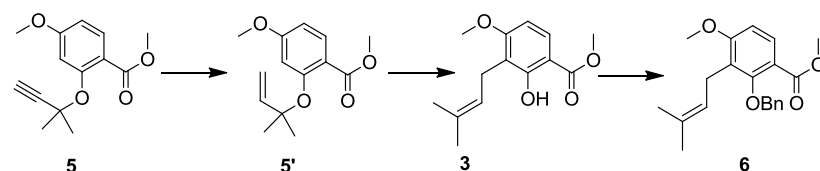

### Methyl 2-hydroxy-4-methoxy-3-(3-methylbut-2-en-1-yl)benzoate (3)

A solution of alkyne **5** (1.45 g, 5.86 mmol) in EtOAc (10 mL) was treated with Pd/BaSO<sub>4</sub> (60 mg)

and quinoline (20  $\mu$ L) and the mixture was hydrogenated (1atm) over 40min (the reaction was monitored every 10min by TLC and stopped once the starting material was consumed). The reaction mixture was filtered through celite, concentrated and submitted directly to the Claisen rearrangement.

The crude alkene **5'** was dissolved in DMF (20 mL) and heated at 120  $^{\circ}$ C for 5 h, The yellow solution was concentrated and purified by column chromatography on silica gel (Petroleum ether /EtOAc 10: 1) to yield a crude phenol **3** (1.23g, 84% for two steps).  **$^1\text{H}$  NMR** (400 MHz,  $\text{CDCl}_3$ , ppm):  $\delta$  11.06 (s, 1H), 7.71 (d,  $J$  = 8.8 Hz, 1H), 6.45 (d,  $J$  = 8.8 Hz, 1H), 5.22 (t,  $J$  = 7.2 Hz, 1H), 3.91 (s, 3H), 3.88 (s, 3H), 3.38 (d,  $J$  = 7.2 Hz, 2H), 1.80 (s, 3H), 1.69 (s, 3H);  **$^{13}\text{C}$  NMR** (100 MHz,  $\text{CDCl}_3$ , ppm):  $\delta$  170.7, 162.7, 160.5, 131.7, 128.8, 122.1, 117.0, 105.9, 102.2, 55.6, 51.9, 25.8, 21.9, 17.7; **MS** (EI)  $m/z$  (%): 250 ( $\text{M}^+$ , 61), 218 (51), 203 (100), 190 (46), 175 (92), 163 (81), 133 (22), 105 (14), 91 (10), 77 (11), 40 (15).

**Methyl 2-(benzyloxy)-4-methoxy-3-(3-methylbut-2-en-1-yl)benzoate (6)**

To a solution of phenol **3** (1.23 g, 4.92 mmol) in acetone (40 mL) was added benzyl bromide (1.05 mL, 8.79 mmol) and potassium carbonate (1.20 g, 8.79 mmol). The resulting suspension was rapidly stirred at reflux for 16 h, cooled, and the acetone removed under reduced pressure. The resulting residue was partitioned between ethyl acetate (60 mL) and 1.0N hydrochloric acid (30 mL). The aqueous layer was washed twice with 60 mL portions of ethyl acetate. Combined organic layers were dried over sodium sulfate and concentrated under reduced pressure. The residue was purified by flash chromatography (Petroleum ether/EtOAc 8:1), which afforded **6** (1.59 g, 95%) as a colorless oil.  **$^1\text{H}$  NMR** (400 MHz,  $\text{CDCl}_3$ , ppm):  $\delta$  7.83 (d,  $J$  = 8.8 Hz, 1H), 7.51 (d,  $J$  = 7.2 Hz, 2H), 7.32-7.42 (m, 3H), 5.16 (t,  $J$  = 1.6 Hz, 1H), 4.94 (s, 2H), 3.89 (s, 3H), 3.84 (s, 3H), 3.39 (d,  $J$  = 7.2 Hz 2H), 1.66-1.67 (t, 6H);  **$^{13}\text{C}$  NMR** (100 MHz,  $\text{CDCl}_3$ , ppm):  $\delta$  166.5, 162.0, 158.1, 137.5, 131.7, 131.0, 128.4, 128.0, 127.9, 125.1, 122.6, 117.0, 106.1, 76.9, 55.8, 51.8, 25.7, 23.0, 17.9; **MS** (EI)  $m/z$  (%): 340 ( $\text{M}^+$ , 3), 249 (7), 235 (15), 217 (57), 195 (17), 163 (22), 91 (100), 40 (33).

**(S)-methyl 2-(benzyloxy)-3-(2,3-dihydroxy-3-methylbutyl)-4-methoxybenzoate (7)**

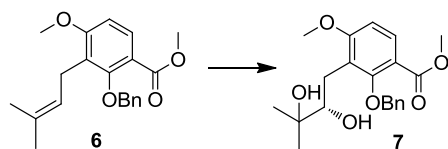

A 50 mL flask, equipped with a magnetic stirrer, was charged with *t*-BuOH (28 mL), water (28 mL), and AD-mix-  $\alpha$  (7.80 g). Stirring at room temperature produced two clear phases. Methanesulfonamide (563mg, 6.1 mmol) was added and the mixture was cooled to 0  $^{\circ}$ C where upon some of the dissolved salts precipitated. Olefin **6** (1.90 g, 5.57 mmol) was added at once, and the heterogeneous slurry was stirred vigorously at 0  $^{\circ}$ C for 48 h. While the mixture was stirred at 0  $^{\circ}$ C, solid sodium sulfite (7.5 g) was added and the mixture was allowed to warm to room temperature and stirred for 30 min. Ethyl acetate (50 mL) was added to the mixture. After separation of the layers, the aqueous phase was further extracted with EtOAc (3 x 75 mL). The combined organic layers were washed with 2 N KOH (25 mL) thoroughly, dried over a hydrous  $\text{Na}_2\text{SO}_4$  and concentrated. This crude product was purified by flash chromatography (Petroleum ether/EtOAc 2:1) to afford **7** (1.63 g, 78%) as a colorless oil.  $[\alpha]_D^{20}$  -4.82 $^{\circ}$  (c 1.0,  $\text{CHCl}_3$ )  **$^1\text{H}$  NMR** (400 MHz,  $\text{CDCl}_3$ , ppm):  $\delta$  7.89 (d,  $J$  = 8.8 Hz, 1H), 7.50 (d,  $J$  = 6.8 Hz, 2H), 7.33-7.42 (m, 3H), 6.75 (d,  $J$  = 8.8 Hz, 2H), 5.09 (d,  $J$  = 10.4 Hz, 1H), 4.89 (d,  $J$  = 10.4 Hz, 1H), 3.89 (s, 3H), 3.87 (s, 3H), 3.50-3.54 (m, 1H), 2.90-2.94 (dd,  $J$  = 2 Hz,  $J$  = 13.6, 1H), 2.68-2.74 (m, 2H),

2.35 (s, 1H), 1.18 (s, 3H), 1.14 (s, 3H);  $^{13}\text{C}$  NMR (100 MHz,  $\text{CDCl}_3$ , ppm):  $\delta$  166.0, 161.9, 158.6, 136.8, 131.8, 128.5, 128.4, 128.2, 122.4, 117.0, 106.3, 78.4, 72.8, 55.9, 51.9, 43.2, 26.2, 25.8, 23.6; MS (EI)  $m/z$  (%): 374 ( $\text{M}^+$ , <1), 283 (5), 225 (6), 195 (20), 193 (90), 163 (50), 91 (100), 43 (22); HRMS (ESI): calcd for  $\text{C}_{21}\text{H}_{27}\text{O}_6\text{Na}$  [ $\text{M} + \text{Na}$ ] $^+$ : 397.1622; Found 397.1631

**(R)-methyl 2-(benzyloxy)-3-((3,3-dimethyloxiran-2-yl)methyl)-4-methoxybenzoate (8)**

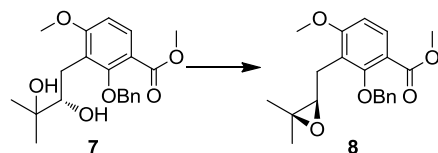

To a solution of **7** (2.60 g, 6.95 mmol) in  $\text{CH}_2\text{Cl}_2$  (60 mL), pyridine (1.13 mL, 13.9 mmol) and  $\text{MsCl}$  (0.80 mL) was added at 0 °C. Then the reaction mixture was stirred for 12 h at room temperature. After completion of the reaction, the volatiles were evaporated and the residue were dissolved in MeOH (30 mL) and treated with  $\text{K}_2\text{CO}_3$  (1.82 g, 13.2 mmol) by refluxing for 4 h. The solvent was removed in vacuo and the residue was diluted by  $\text{Et}_2\text{O}$  (70 mL), washed by water (10 mL), dried ( $\text{Na}_2\text{SO}_4$ ), and concentrated. The residue was purified by flash chromatography (Petroleum ether/ $\text{EtOAc}$  8:1), which afforded **8** (1.22 g, 49%) as a colorless oil.  $[\alpha]_D^{20} +5.0^\circ$  ( $c$  1.0,  $\text{CHCl}_3$ )  $^1\text{H}$  NMR (400 MHz,  $\text{CDCl}_3$ , ppm):  $\delta$  7.89 (d,  $J$  = 8.8 Hz, 1H), 7.52 (d,  $J$  = 7.2 Hz, 2H), 7.31-7.41 (m, 3H), 6.74 (d,  $J$  = 8.8 Hz, 2H), 5.00 (s, 2H), 3.90 (s, 3H), 3.86 (s, 3H), 2.95-3.02 (m, 2H), 2.85 (dd,  $J$  = 4 Hz,  $J$  = 11.6 Hz, 1H), 1.31 (s, 3H), 1.26 (s, 3H);  $^{13}\text{C}$  NMR (100 MHz,  $\text{CDCl}_3$ , ppm):  $\delta$  166.2, 162.2, 158.7, 137.3, 131.8, 128.4, 128.2, 127.9, 121.6, 117.1, 106.0, 77.1, 63.4, 59.0, 55.7, 51.9, 24.8, 23.8, 19.0; MS (EI)  $m/z$  (%): 356 ( $\text{M}^+$ , <1), 285 (3), 265 (4), 253 (7), 207 (13), 195 (12), 163 (24), 91 (100), 65 (6), 40 (39), HRMS (ESI): calcd for  $\text{C}_{21}\text{H}_{25}\text{O}_5$  [ $\text{M} + \text{H}$ ] $^+$ : 357.1697; Found 357.1699.

**Preparation of Compound 2 and 9a**

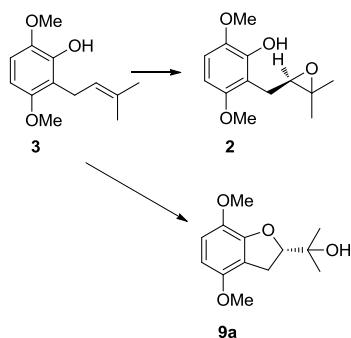

To a solution of olefin **3** (250 mg, 1 mmol) and chiral ketone **18** (91 mg, 0.3 mmol) in 2:1 dimethoxymethane (12 mL) and acetonitrile (6 mL) were added tetrabutylammonium sulfate (14 mg, 0.04 mmol) and an aqueous buffer solution (3.6 mL) containing  $\text{Na}_2\text{B}_4\text{O}_7$  (0.05 M) and  $\text{Na}_2\text{EDTA}$  (0.004 M). To this cooled (0 °C), rapidly stirring biphasic mixture were simultaneously added, via two syringe pumps, a solution of Oxone (6.5 mL, 0.25 M) in 0.004 M aqueous  $\text{Na}_2\text{EDTA}$  and an aqueous solution of  $\text{K}_2\text{CO}_3$  (333 mg, 6.5 mL) over the course of 12 h. The reaction mixture was then stirred for a further 10 h until TLC analysis indicated complete consumption of substrate. The reaction was diluted with  $\text{EtOAc}$  (300 mL) and washed with water (x 2) and brine, dried over  $\text{MgSO}_4$  and concentrated in vacuo. The residue was purified by flash chromatography (Petroleum ether/ $\text{EtOAc}$  4:1), which afforded **2** as a colorless solid. **(R)-2-((3,3-dimethyloxiran-2-yl)methyl)-3,6-dimethoxyphenol**

**(2):** yield :95%; 74% ee  $[\alpha]_D^{20} +4.2^\circ$  (*c* 1.43, CHCl<sub>3</sub>) **<sup>1</sup>H NMR** (400 MHz, CDCl<sub>3</sub>, ppm):  $\delta$  11.11 (s, 1H), 7.74 (d, *J* = 8.8 Hz, 1H), 6.45 (d, *J* = 8.8 Hz, 1H), 3.90 (s, 3H), 3.87 (s, 3H), 3.04 (dd, *J* = 4.8 Hz, *J* = 13.2 Hz, 1H), 2.96 (dd, *J* = 4.8 Hz, *J* = 6.8 Hz, 1H), 2.82 (dd, *J* = 6.8 Hz, *J* = 13.6), 1.41 (s, 3H), 1.26 (s, 3H); **<sup>13</sup>C NMR** (100 MHz, CDCl<sub>3</sub>, ppm):  $\delta$  170.6, 163.1, 160.9, 130.0, 113.2, 105.9, 102.2, 63.2, 59.0, 55.6, 51.9, 24.8, 22.5, 19.0; (EI) *m/z* (%): 266 (*M*<sup>+</sup>, 11), 223 (41), 207 (40), 191 (23), 163 (100), 148 (24), 133 (39), 105 (21), 77 (10), 43 (6), **HRMS** (ESI): calcd for C<sub>14</sub>H<sub>19</sub>O<sub>5</sub> [*M*+ *H*]<sup>+</sup>: 267.1227; Found 267.1221. When the reaction mixture was then stirred for a further 24 h until TLC analysis indicated complete consumption of substrate. follow the same producer, The residue was purified by flash chromatography (Petroleum ether/EtOAc 4:1), which afforded **9a** as a colorless solid.

**(S)-2-(4,7-dimethoxy-2,3-dihydrobenzofuran-2-yl)propan-2-ol (9a):** yield 92%; 77% ee  $[\alpha]_D^{20} +22.0^\circ$  (*c* 1.0, CHCl<sub>3</sub>) **<sup>1</sup>H NMR** (400 MHz, CDCl<sub>3</sub>, ppm):  $\delta$  7.67 (d, *J* = 8.8 Hz, 1H), 6.37 (d, *J* = 8.8 Hz, 1H), 4.71 (t, *J* = 8.8 Hz, 1H), 3.81 (s, 3H), 3.80 (s, 3H), 3.20 (br, s, 1H), 3.02 (d, *J* = 8.8 Hz, 2H), 1.29 (s, 3H), 1.19 (s, 3H); **<sup>13</sup>C NMR** (100 MHz, CDCl<sub>3</sub>, ppm):  $\delta$  165.5, 161.6, 159.7, 131.7, 115.2, 106.1, 103.1, 90.9, 71.5, 55.4, 51.4, 27.4, 25.3, 23.9; (EI) *m/z* (%): 266 (*M*<sup>+</sup>, 2), 219 (17), 207 (100), 208 (96), 177 (18), 175 (26), 163 (14), 148 (19), 133 (15), 117 (21), 59 (19), 43 (42), **HRMS** (ESI): calcd for C<sub>14</sub>H<sub>19</sub>O<sub>5</sub> [*M*+ *H*]<sup>+</sup>: 267.1227; Found 267.1222.

**(R)-methyl 3-hydroxy-5-methoxy-2,2-dimethylchroman-8-carboxylate (9b)**

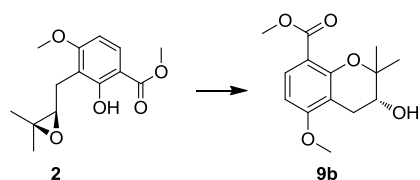

To a solution of **2** (128 mg, 0.48 mmol) in EtOAc (15 mL) was added formic acid (0.1 mL). Then the reaction mixture was stirred for 2 h at room temperature. After completion of the reaction, it was diluted with EtOAc (20 mL). The organic solution was washed sequentially with water (5 mL) and brine (5 mL). The organic layer was dried over Na<sub>2</sub>SO<sub>4</sub>, filtered and concentrated in vacuo. The resulting brown oil was purified by flash silica gel chromatography (Petroleum ether/EtOAc 1:2) to afford the desired Methyl ester **9b** (115 mg, 90%) as a white solid.  $[\alpha]_D^{20} 4.0^\circ$  (*c* 1.0, CHCl<sub>3</sub>) **<sup>1</sup>H NMR** (400 MHz, CDCl<sub>3</sub>, ppm):  $\delta$  7.77 (d, *J* = 8.8 Hz, 1H), 6.46 (d, *J* = 8.8 Hz, 2H), 3.87 (s, 6H), 3.86 (s, 6H), 2.91 (dd, *J* = 5.2 Hz, *J* = 17.6 Hz, 1H), 2.69 (dd, *J* = 5.6 Hz, *J* = 17.6 Hz, 1H), 1.40 (s, 3H), 1.36 (s, 3H); **<sup>13</sup>C NMR** (100 MHz, CDCl<sub>3</sub>, ppm):  $\delta$  166.4, 161.3, 154.2, 131.3, 112.4, 108.9, 101.5, 77.32, 68.74, 55.6, 51.5, 26.5, 24.6, 21.6; **MS** (EI) *m/z* (%): 266 (*M*<sup>+</sup>, 33), 207 (13), 195 (27), 164 (28), 163 (100), 136 (13), 133 (16), 105 (8), 43 (7); **HRMS** (ESI): calcd for C<sub>14</sub>H<sub>19</sub>O<sub>5</sub> [*M*+ *H*]<sup>+</sup>: 267.1227; Found 267.1230.

**Preparation of compound 10, 11 and 12**

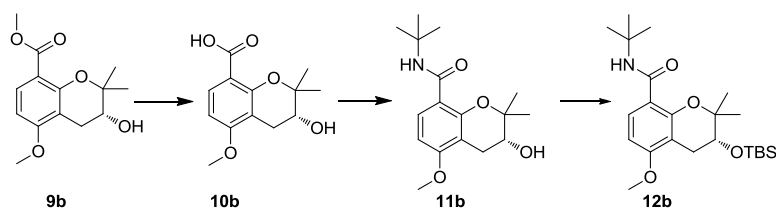

**(R)-3-hydroxy-5-methoxy-2,2-dimethylchroman-8-carboxylic acid (10b)**

Methyl ester **9b** (680 mg, 2.56 mmol) was saponified in THF: MeOH: H<sub>2</sub>O (3:1:1, 30 mL) in a 50 mL vial equipped with a stir bar. LiOH·H<sub>2</sub>O (859 mg, 20.48 mmol) was added to the suspension, and the reaction was allowed to stir until completion (4 h) as determined by TLC. The reaction mixture was diluted with brine (3 mL) and acidified to pH 2 with 1 M HCl (pH paper), resulting in a biphasic solution. The upper layer (THF) was removed, and the aqueous layer was extracted with THF (63 mL). The combined organic layers were dried with Na<sub>2</sub>SO<sub>4</sub> and then concentrated under reduced pressure to afford acid **10b** as a white solid.  $[\alpha]_D^{20}$  -13° (c 1.0, CHCl<sub>3</sub>) **<sup>1</sup>H NMR** (400 MHz, CDCl<sub>3</sub>, ppm): δ 8.00 (d, *J* = 8.8 Hz, 1H), 6.58 (d, *J* = 8.8 Hz, 1H), 3.92 (t, *J* = 5.6 Hz, 1H), 3.88 (s, 3H), 2.95 (dd, *J* = 5.6 Hz, *J* = 17.6 Hz, 1H), 2.70 (dd, *J* = 6.0 Hz, *J* = 17.6 Hz, 1H), 1.45 (s, 6H); **<sup>13</sup>C NMR** (100 MHz, CDCl<sub>3</sub>, ppm): δ 165.9, 162.2, 152.4, 133.0, 110.0, 108.8, 103.6, 80.8, 68.1, 55.8, 26.1, 24.9, 21.5; **MS** (EI) *m/z* (%): 252 (M<sup>+</sup>, 40), 193 (17), 181 (17), 164 (35), 163 (100), 136 (23), 105 (13), 57 (22), 43 (31); **HRMS** (ESI): calcd for C<sub>13</sub>H<sub>17</sub>O<sub>5</sub> [M+ H]<sup>+</sup>: 253.1071; Found 253.1074.

**(R)-N-(tert-butyl)-3-hydroxy-5-methoxy-2,2-dimethylchroman-8-carboxamide (11b)**

A scintillation vial containing acid **10b** was charged with DMF (10.0 mL) and cooled to 0 °C. Diisopropylethylamine (1.31 mL, 2.56 mmol, 1.0 equiv) was added dropwise to the flask. <sup>t</sup>BuNH<sub>2</sub> (0.31 mL, 5.12 mmol, 2 equiv) was then added to the flask. 2-(1H-Benzotriazole-1-yl)-1,1,3,3-tetramethylaminiumtetrafluoroborate, TBTU (0.930 g, 2.46 mmol, 0.96 equiv), was then added to the reaction mixture. The reaction mixture was stirred at room temperature for 4 h. then 40 mL EtOAc was added. The organic layer was washed with DI H<sub>2</sub>O (2 x 10 mL), 1% phosphoric acid (2 x 10 mL), 2% K<sub>2</sub>CO<sub>3</sub> (2 x 10 mL), and brine (2 x 10 mL). Each aqueous layer was back-extracted with EtOAc (2 x 40 mL). The combined organic layers were dried over Na<sub>2</sub>SO<sub>4</sub>, filtered and concentrated under reduced pressure, the desired product was isolated as white foam and the residue was purified by flash chromatography (Petroleum ether/EtOAc 4:1) to give the desired **11b**.  $[\alpha]_D^{20}$  -14° (c 1.0, CHCl<sub>3</sub>) **<sup>1</sup>H NMR** (400 MHz, CDCl<sub>3</sub>, ppm): δ 8.13 (s, 1H), 8.03 (d, *J* = 8.8 Hz, 1H), 6.52 (d, *J* = 8.8 Hz, 1H), 3.83-3.85 (m, 4H), 2.92 (dd, *J* = 5.6 Hz, *J* = 17.6 Hz, 1H), 2.66 (dd, *J* = 6.4 Hz, *J* = 17.6 Hz, 1H), 1.44 (s, 9H), 1.40 (s, 3H), 1.39 (s, 3H); **<sup>13</sup>C NMR** (100 MHz, CDCl<sub>3</sub>, ppm): δ 164.3, 160.1, 151.4, 131.0, 115.5, 107.9, 102.6, 78.4, 68.6, 55.5, 50.9, 29.0, 26.7, 24.9, 21.8; **MS** (EI) *m/z* (%): 307 (M<sup>+</sup>, 22), 235 (66), 217 (33), 163 (56), 132 (30), 91 (100), 57 (23), 43 (22), 40 (53); **HRMS** (ESI): calcd for C<sub>17</sub>H<sub>26</sub>NO<sub>4</sub> [M+ H]<sup>+</sup>: 308.1856; Found 308.1848.

**(R)-N-(tert-butyl)-3-((tert-butyldimethylsilyl)oxy)-5-methoxy-2,2-dimethylchroman-8-carboxamide (12b)**

To a solution of the alcohol **11b** and 2,6-lutidine (0.75 mL, 6.4 mmol, 2.5eq) in anhydrous CH<sub>2</sub>Cl<sub>2</sub> (15 mL) was added TBSOTf (0.88 mL, 3.84 mmol, 1.5eq) at room temperature and the mixture was stirred at room temperature for 12 h. A saturated aqueous solution of NaHCO<sub>3</sub> was added to the reaction mixture and the product was thoroughly extracted with Et<sub>2</sub>O. The organic extracts were successively washed with a 3% aqueous solution of KHSO<sub>4</sub> twice, a saturated aqueous solution of NaHCO<sub>3</sub>, and saturated brine, dried over Na<sub>2</sub>SO<sub>4</sub>, and concentrated under reduced pressure. The residue was purified by silica gel column chromatography (Petroleum ether/EtOAc 1:8) to give TBS ether **12b** (1.006 g, 93% from **9b** for three steps).  $[\alpha]_D^{20}$  -46° (c 1.0, CHCl<sub>3</sub>) **<sup>1</sup>H NMR** (400 MHz, CDCl<sub>3</sub>, ppm): δ 8.10 (s, 1H), 8.05 (d, *J* = 8.8 Hz, 2H), 6.52 (d, *J* = 8.8 Hz, 1H), 3.85 (s, 3H), 3.82 (m, 1H), 2.90 (dd, *J* = 6.4 Hz, *J* = 17.2 Hz, 1H), 2.44 (dd, *J* = 9.6 Hz, *J* = 17.2 Hz, 1H), 1.46 (s, 3H), 1.45 (s, 9H), 1.22 (s, 3H), 0.92 (s, 9H), 0.12 (d, *J* = 9.2 Hz); **<sup>13</sup>C NMR** (100 MHz, CDCl<sub>3</sub>, ppm): δ 164.3, 159.6, 151.4, 130.7, 115.3, 109.5, 102.3, 78.7, 69.9, 55.5, 50.8, 29.01, 27.2, 26.5, 25.7, 18.9, 17.8, -4.1, -5.0; **MS** (ESI) *m/z* (%): [M+ H]<sup>+</sup>: Found 422.3; **HRMS** (ESI): calcd for C<sub>23</sub>H<sub>40</sub>NO<sub>4</sub>Si [M+ H]<sup>+</sup>: 422.2721;

Found 422.2726.

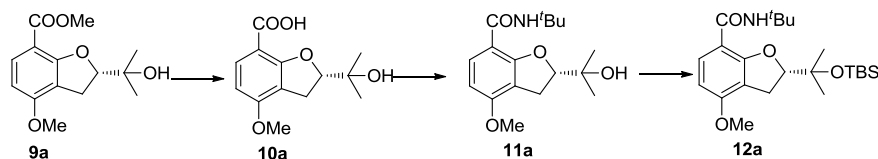

Follow the above operation, **10a**, **11a** and **12a** could be obtained.

**(S)-2-(2-hydroxypropan-2-yl)-4-methoxy-2,3-dihydrobenzofuran-7-carboxylic acid (10a)** [ $\alpha$ ]<sub>D</sub><sup>20</sup> +32° (c 1.0, CHCl<sub>3</sub>) <sup>1</sup>H NMR (400 MHz, CDCl<sub>3</sub>, ppm):  $\delta$  7.79 (d,  $J$  = 8.8 Hz, 1H), 6.47 (d,  $J$  = 8.8 Hz, 1H), 6.18 (br, s, 1H), 4.81 (t,  $J$  = 8.8 Hz, 1H), 3.87 (s, 3H), 3.11 (dd,  $J$  = 9.6 Hz,  $J$  = 16 Hz, 1H), 3.03 (dd,  $J$  = 8.8 Hz,  $J$  = 16 Hz, 1H), 1.35 (s, 3H), 1.21 (s, 3H); <sup>13</sup>C NMR (100 MHz, CDCl<sub>3</sub>, ppm):  $\delta$  168.1, 161.5, 160.5, 132.8, 115.0, 105.5, 103.9, 91.9, 71.8, 55.6, 27.7, 25.8, 23.5; **MS** (EI)  $m/z$  (%): 252 (M<sup>+</sup>, 3), 223 (26), 207 (64), 191 (21), 175 (32), 163 (100), 149 (48), 133 (37), 106 (45), 71 (33), 57 (45), 42 (76); **HRMS** (ESI): calcd for C<sub>13</sub>H<sub>17</sub>O<sub>5</sub> [M+ H]<sup>+</sup>: 253.1071; Found 253.1065.

**(S)-N-(tert-butyl)-2-(2-hydroxypropan-2-yl)-4-methoxy-2,3-dihydrobenzofuran-7-carboxamide (11a)** [ $\alpha$ ]<sub>D</sub><sup>20</sup> -2.0° (c 1.0, CHCl<sub>3</sub>) <sup>1</sup>H NMR (400 MHz, CDCl<sub>3</sub>, ppm):  $\delta$  7.84 (d,  $J$  = 8.8 Hz, 1H), 7.41 (s, 1H), 6.47 (d,  $J$  = 8.8 Hz, 1H), 4.75 (t,  $J$  = 9.6 Hz, 1H), 3.83 (s, 3H), 3.17 (dd,  $J$  = 8.8 Hz,  $J$  = 16 Hz, 1H), 3.07 (dd,  $J$  = 9.6 Hz,  $J$  = 16 Hz, 1H), 2.25 (br, s, 1H), 1.43 (s, 9H), 1.36 (s, 3H), 1.26 (s, 3H); <sup>13</sup>C NMR (100 MHz, CDCl<sub>3</sub>, ppm):  $\delta$  163.5, 158.5, 157.8, 130.8, 113.9, 110.5, 103.9, 91.3, 71.2, 55.4, 50.8, 29.0, 27.3, 26.0, 25.0; **MS** (EI)  $m/z$  (%): 307 (M<sup>+</sup>, 1), 249 (100), 235 (32), 217 (15), 192 (87), 163 (43), 149 (23), 133 (18), 105 (15), 57 (20), 43 (45); **HRMS** (ESI): calcd for C<sub>17</sub>H<sub>26</sub>NO<sub>4</sub> [M+ H]<sup>+</sup>: 308.1856; Found 308.1848.

**(S)-N-(tert-butyl)-2-((tert-butyldimethylsilyl)oxy)propan-2-yl)-4-methoxy-2,3-dihydrobenzofuran-7-carboxamide (12a)** (91% from **9a** for three steps) [ $\alpha$ ]<sub>D</sub><sup>20</sup> -7.0° (c 1.0, CHCl<sub>3</sub>) <sup>1</sup>H NMR (400 MHz, CDCl<sub>3</sub>, ppm):  $\delta$  7.85 (d,  $J$  = 8.8 Hz, 2H), 7.49 (s, 1H), 6.45 (d,  $J$  = 8.8 Hz, 1H), 3.85 (dd,  $J$  = 7.2, 9.6 Hz, 1H), 3.82 (s, 1H), 3.18 (dd,  $J$  = 7.2 Hz, 15.6 Hz, 1H), 2.44 (dd,  $J$  = 9.6 Hz, 15.6 Hz, 1H), 1.44 (s, 3H), 1.36 (s, 9H), 1.26 (s, 3H), 0.64 (s, 9H), 0.012 (d,  $J$  = 9.6 Hz); <sup>13</sup>C NMR (100 MHz, CDCl<sub>3</sub>, ppm):  $\delta$  163.7, 158.4, 158.3, 130.5, 114.0, 110.2, 103.5, 91.45, 74.13, 55.4, 50.7, 29.0, 27.3, 26.9, 25.6, 25.3, 17.8, -2.3, -2.4. (ESI)  $m/z$  (%): [M+ H]<sup>+</sup>: Found 422.4; **HRMS** (ESI): calcd for C<sub>23</sub>H<sub>40</sub>NO<sub>4</sub>Si [M+ H]<sup>+</sup>: 422.2721; Found 422.2727.

**(R)-N-(tert-butyl)-3-((tert-butyldimethylsilyl)oxy)-7-((S)-2-hydroxypropyl)-5-methoxy-2,2-dimethylchroman-8-carboxamide (13b)**

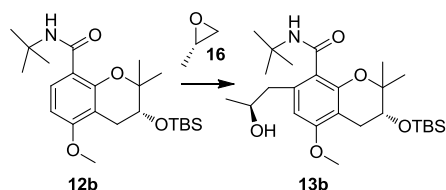

To a solution of **12b** (544 mg, 1.30 mmol) in dry THF (10 mL) was added TMEDA (0.78 mL, 5.20 mmol) at -78 °C. To the resulting mixture was added dropwise a solution n-BuLi in hexane (2.5M, 1.77 mL, 5.20 mmol) at -78 °C. After 2 h, to the resulting mixture was added dropwise (s)-(-)-propylene oxide (0.36 mL) at -78 °C. The reaction mixture was stirred at -78 °C for 3 h, and



allowed to warm to 25 °C for an additional hour. The resulting mixture was quenched with saturated aqueous NH<sub>4</sub>Cl and 1M HCl aqueous, and extracted with EtOAc and CH<sub>2</sub>Cl<sub>2</sub>. The combined extracts were washed with brine, dried over Na<sub>2</sub>SO<sub>4</sub>, and concentrated in vacuo. The residue was purified by silica gel chromatography (Petroleum ether/EtOAc 2:1 to 1:1) to afford **13b** (334 mg, 54%) as a white crystal.  $[\alpha]_D^{20} +34^\circ$  (c 1.0, CHCl<sub>3</sub>); <sup>1</sup>H NMR (CDCl<sub>3</sub>, 400MHz): δ 6.26 (s, 1H), 5.98 (s, 1H), 5.23 (br, s, 1H), 3.89-3.96 (m, 1H), 3.79 (s, 3H), 3.74 (dd, 1H, *J* = 6.0, 6.6 Hz), 2.80 (dd, *J* = 6, 16.8 Hz, 1H), 2.64-2.71 (m, 2H), 2.39 (dd, *J* = 8.8, 16.8 Hz, 1H), 1.41 (s, 9H), 1.33 (s, 3H), 1.25 (d, *J* = 6.4 Hz, 3H), 1.17 (s, 3H), 0.88 (s, 9H), 0.08 (d, *J* = 7.2 Hz, 6H). <sup>13</sup>C NMR (CDCl<sub>3</sub>, 100MHz): δ 167.6, 157.8, 150.0, 138.4, 119.1, 107.3, 103.7, 77.4, 69.6, 68.4, 55.2, 51.4, 42.9, 28.6, 26.7, 26.2, 25.6, 24.4, 19.4, 17.7, -4.3, -5.2. MS (ESI) *m/z* (%): [M+ H]<sup>+</sup>: Found 480.4; HRMS (ESI): calcd for C<sub>26</sub>H<sub>46</sub>O<sub>5</sub>SiN [M+ H]<sup>+</sup>: 480.3140; Found 480.3147.

**(S)-N-(tert-butyl)-2-(2-((tert-butyldimethylsilyl)oxy)propan-2-yl)-6-((S)-2-hydroxypropyl)-4-methoxy-2,3-dihydrobenzofuran-7-carboxamide (13a)**

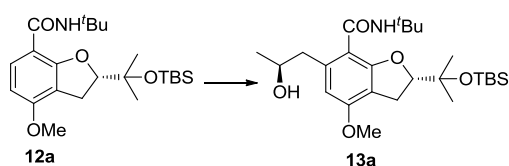

Follow the above operation, **13a** could be obtained. **13a** (61% yield)  $[\alpha]_D^{20} +48^\circ$  (c 1.0, CHCl<sub>3</sub>); <sup>1</sup>H NMR (CDCl<sub>3</sub>, 400MHz): δ 6.74 (s, 1H), 6.25 (s, 1H), 5.48 (br, s, 1H), 4.54 (t, *J* = 8.8 Hz, 1H), 3.93 (br, s, 1H), 3.80 (s, 1H), 3.12 (dd, *J* = 7.2, 15.6 Hz, 1H), 2.96-3.04 (m, 2H), 2.84 (dd, *J* = 3.2, 13.2 Hz, 1H), 1.41 (s, 9H), 1.32 (s, 3H), 1.27 (d, *J* = 7.6 Hz, 3H), 1.26 (s, 3H), 0.67 (s, 9H), 0.04 (d, *J* = 17.6 Hz, 6H). <sup>13</sup>C NMR (CDCl<sub>3</sub>, 100MHz): δ 166.2, 158.8, 156.6, 142.1, 112.5, 111.5, 106.6, 90.9, 74.2, 69.3, 55.3, 51.3, 43.0, 28.8, 27.5, 26.8, 25.5, 25.3, 24.4, 17.8, -2.3, -2.4. MS (ESI) *m/z* (%): [M+ H]<sup>+</sup>: Found 480.4; HRMS (ESI): calcd for C<sub>26</sub>H<sub>46</sub>O<sub>5</sub>SiN [M+ H]<sup>+</sup>: 480.3140; Found 480.3142.

**Preparation of 14, Coriandrone B and Coriandrone A**

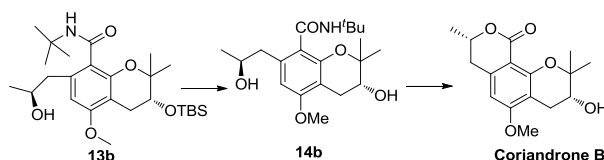

**(R)-N-(tert-butyl)-3-hydroxy-7-((S)-2-hydroxypropyl)-5-methoxy-2,2-dimethylchroman-8-carboxamide (14b)**

To a solution of **13b** (448 mg, 0.94 mmol) in anhydrous THF (10 mL) was added a 1.0 M solution of TBAF (0.96 mL, 0.96 mmol) in THF at room temperature and the mixture was stirred at room temperature for 2 h. Then THF was removed under reduced pressure, the residue was diluted by Et<sub>2</sub>O (30 mL), and the organic solution was washed sequentially with water (5 mL) and brine (5 mL). The organic layer was dried over Na<sub>2</sub>SO<sub>4</sub>, filtered and concentrated in vacuo, yielded crude diol **14b** (340mg, 99%), then carried on to the next synthetic transformation without purification.  $[\alpha]_D^{20} +61.0^\circ$  (c2.0, CHCl<sub>3</sub>) <sup>1</sup>H NMR (CDCl<sub>3</sub>, 400MHz): δ 6.29 (s, 1H), 6.19 (br, s, 1H), 3.88-3.96 (m, 1H), 3.82 (s, 3H), 2.63-2.77 (m, 3H), 2.31(dd, *J* = 6, 16.8 Hz, 1H), 2.12 (dd, *J* = 9.2, 16.8 Hz, 1H), 1.4 (s, 9H), 1.29 (d, *J* = 6.4 Hz, 3H), 1.21 (s, 3H), 1.09 (s, 3H). <sup>13</sup>C NMR (CDCl<sub>3</sub>, 100MHz): δ 168.0, 158.3, 150.2, 138.8, 118.4, 108.0, 103.6, 77.80, 68.9, 67.2, 55.3, 51.7, 42.9, 28.6, 25.6, 25.5, 24.6, 19.4. MS (ESI)



$m/z$  (%):  $[M+H]^+$ : Found 366.3; **HRMS** (ESI): calcd for  $C_{20}H_{32}NO_5$   $[M+H]^+$ : 366.2275; Found 366.2267.

**(3R,8S)-3-hydroxy-5-methoxy-2,2,8-trimethyl-3,4,7,8-tetrahydropyrano[4,3-h]chromen-10(2H)-one (Coriandrone B)**

The crude diol (128 mg, 0.35 mmol) was treated with a mixture of 50% aqueous NaOH (6 mL) and EtOH (6 mL) and the mixture heated under reflux for 12 h. Then EtOH was distilled off and the residue neutralized with concentrated HCl at 0 °C. The aqueous phase was extracted three times with EtOAc and the collected organic solutions were washed with saturated aqueous  $NaHCO_3$  and brine and dried over  $Na_2SO_4$ . After evaporation of solvent, the solid residue was purified by flash chromatography (Petroleum ether/EtOAc 1:2) yielding 90 mg (88% yield for two steps) of the **Coriandrone B**.  $[\alpha]_D^{20} +139.0^\circ$  ( $c$  1.1,  $CHCl_3$ ); [lit. $[\alpha]_D^{24} +159.1$  ( $c$  0.87,  $CHCl_3$ )]  **$^1H$  NMR** ( $CDCl_3$ , 400MHz):  $\delta$  6.24 (s, 1H), 4.46-4.54 (m, 1H), 3.86 (s, 3H), 3.80 (t,  $J = 5.2$  Hz, 1H), 2.79-2.89 (m, 2H), 2.75 (dd,  $J = 3.2$  Hz,  $J = 16$  Hz, 1H), 2.68 (dd,  $J = 4.8$  Hz,  $J = 17.6$  Hz), 1.90 (br s, 1H), 1.46 (s, 3H), 1.46 (d,  $J = 6$  Hz, 3H), 1.31 (s, 3H);  **$^{13}C$  NMR** ( $CDCl_3$ , 100MHz):  $\delta$  162.7, 161.6, 155.8, 141.4, 107.9, 107.0, 100.7, 77.8, 73.6, 68.4, 55.6, 36.6, 26.4, 24.3, 22.3, 20.7; **MS** (EI)  $m/z$  (%): 292 ( $M^+$ , 40), 233 (23), 221 (100), 206 (38), 188 (17), 176 (21), 149 (24), 91 (18), 75 (57), 57 (21), 43 (50); **HRMS** (ESI): calcd for  $C_{16}H_{21}O_5$   $[M+H]^+$ : 293.1384; Found 293.1377.

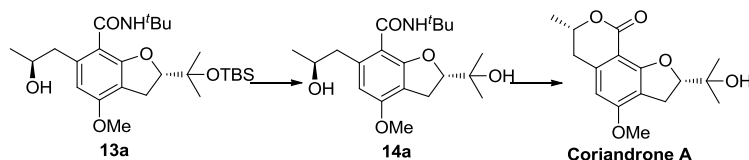

Follow the above operation, **14a** and **Coriandrone A** could be obtained.

**(S)-N-(tert-butyl)-2-(2-hydroxypropan-2-yl)-6-((S)-2-hydroxypropyl)-4-methoxy-2,3-dihydrobenzofuran-7-carboxamide (14a)**  $[\alpha]_D^{20} +56.5^\circ$  ( $c$  2.0,  $CHCl_3$ )  **$^1H$  NMR** ( $CDCl_3$ , 400MHz):  $\delta$  7.14 (s, 1H), 6.29 (s, 1H), 6.19 (s, 1H), 5.70 (br s, 1H), 4.42 (t,  $J = 8.8$  Hz, 1H), 3.90 (br s, 1H), 3.76 (s, 3H), 2.85-2.2.97 (m, 2H), 2.68-2.77 (m, 2H), 1.36 (s, 9H), 1.23 (d,  $J = 6.0$  Hz, 3H), 1.18 (s, 3H), 1.12 (s, 3H).  **$^{13}C$  NMR** ( $CDCl_3$ , 100MHz):  $\delta$  166.30, 158.5, 156.6, 140.8, 112.6, 112.5, 105.8, 90.5, 70.7, 69.3, 55.1, 51.4, 42.6, 28.7, 27.3, 25.2 (25.0), 24.3. **MS** (ESI)  $m/z$  (%):  $[M+H]^+$ : Found 366.3; **HRMS** (ESI): calcd for  $C_{20}H_{32}NO_5$   $[M+H]^+$ : 366.2275; Found 366.2266.

**(2S,7S)-2-(2-Hydroxypropan-2-yl)-4-methoxy-7-methyl-6,7-dihydro-2H-furo[3,2-h]isochromen-9(3H)-one (Coriandrone A)** (83% yield for two steps)  $[\alpha]_D^{20} +121.0^\circ$  ( $c$  1.08,  $CHCl_3$ ); [lit. $[\alpha]_D^{24} +122.5$  ( $c$  0.99,  $CHCl_3$ )]  **$^1H$  NMR** ( $CDCl_3$ , 400MHz):  $\delta$  6.20(s, 1H), 4.76 (t,  $J = 9.2$  Hz, 1H), 4.47-4.56 (m, 1H), 3.84 (s, 3H), 2.99 (d,  $J = 9.2$  Hz, 2H), 2.79 (dd,  $J = 7.6$  Hz,  $J = 11.6$  Hz, 2H), 1.44 (d,  $J = 4.8$  Hz, 3H), 1.32 (s, 3H), 1.18 (s, 3H);  **$^{13}C$  NMR** ( $CDCl_3$ , 100MHz):  $\delta$  163.5, 162.9, 159.8, 141.6, 114.6, 102.0, 101.8, 92.2, 74.4, 71.3, 55.4, 35.8, 27.4, 25.6, 23.5, 20.7. **MS** (EI)  $m/z$  (%): 292 ( $M^+$ , <1), 277 (5), 234 (76), 233 (100), 215 (19), 205 (12), 188 (15), 177 (9), 149 (48), 71 (16), 57 (20), 43 (37); **HRMS** (ESI): calcd for  $C_{16}H_{21}O_5$   $[M+H]^+$ : 293.1384; Found 293.1376.

3 <sup>1</sup>H and <sup>13</sup>C NMR Spectra

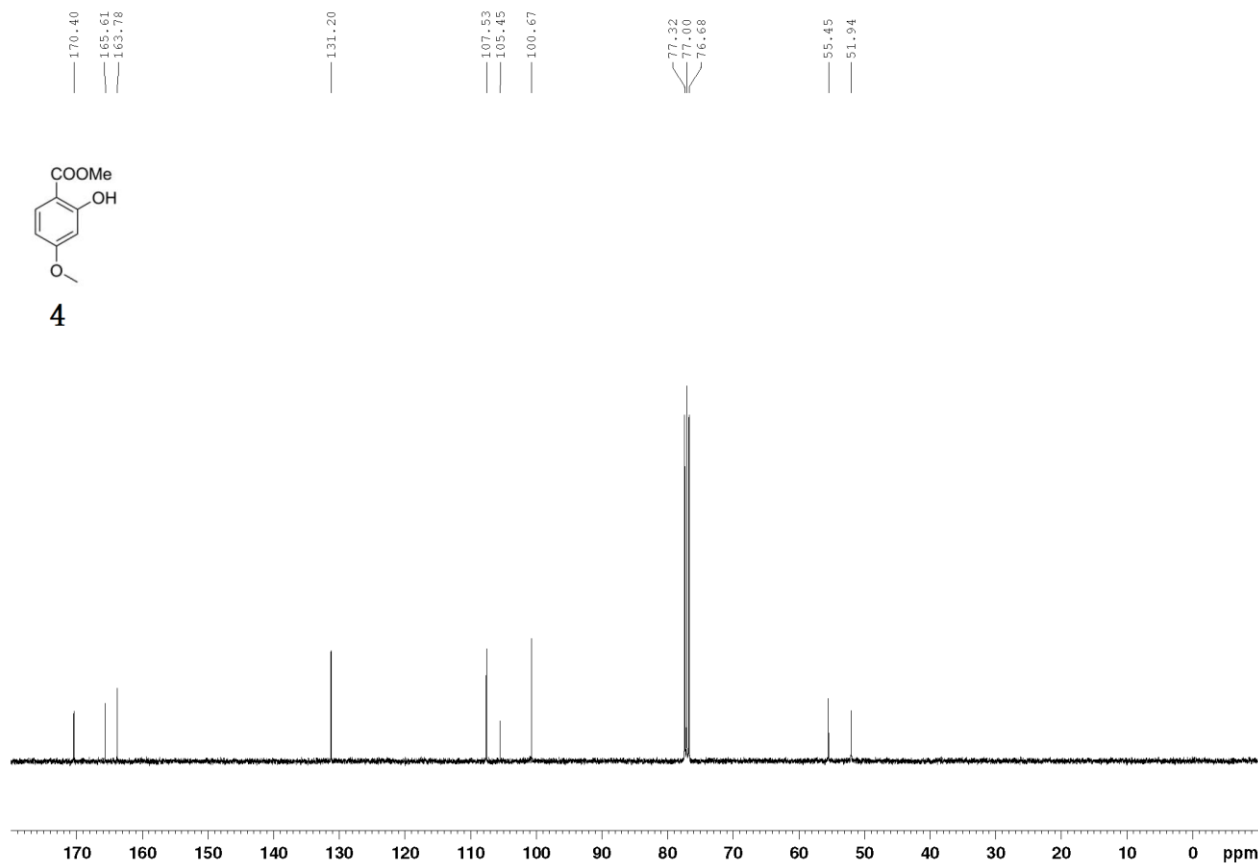

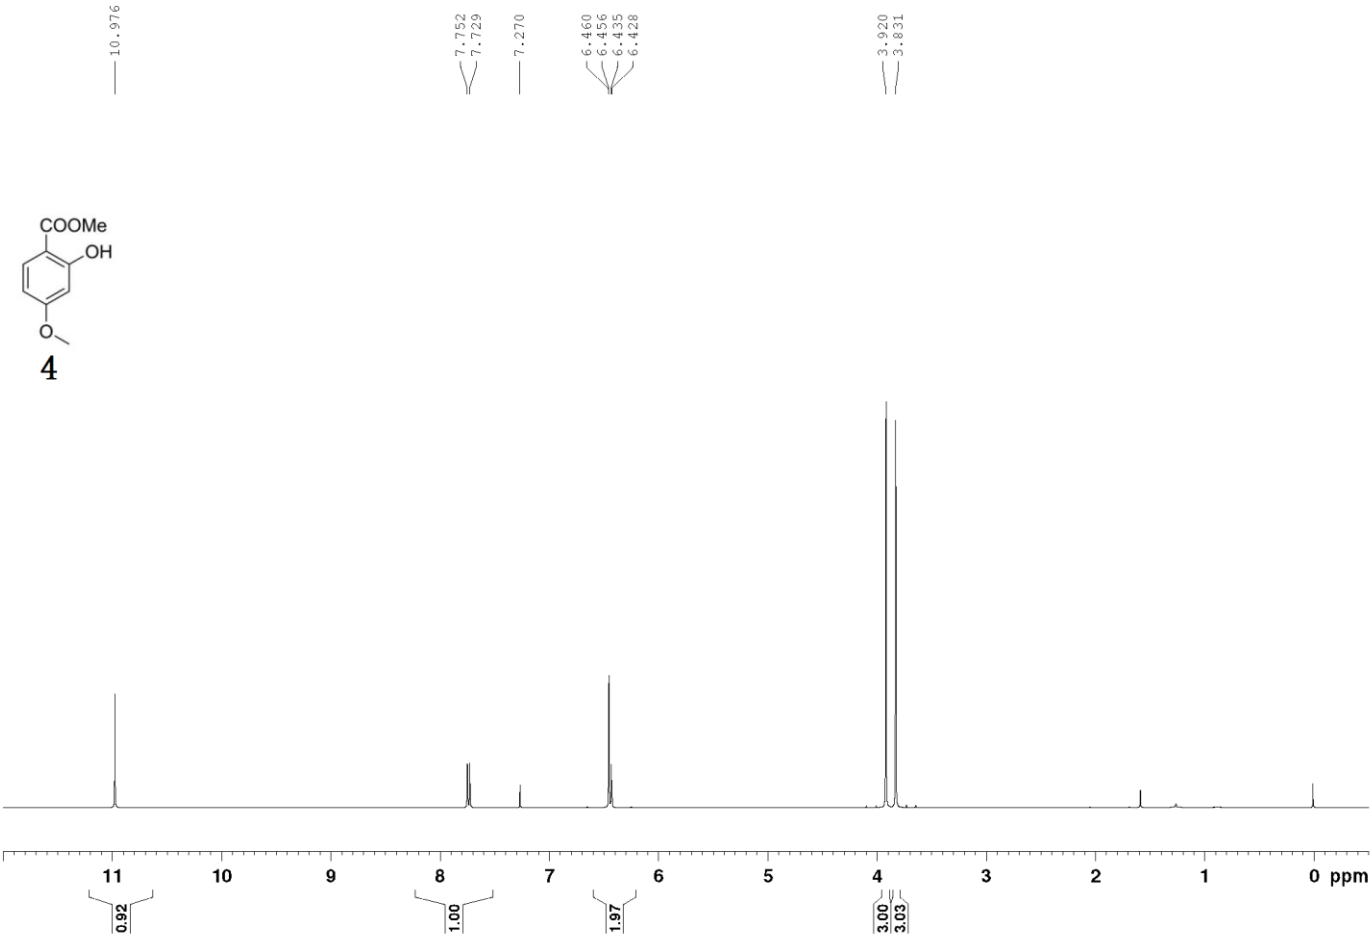

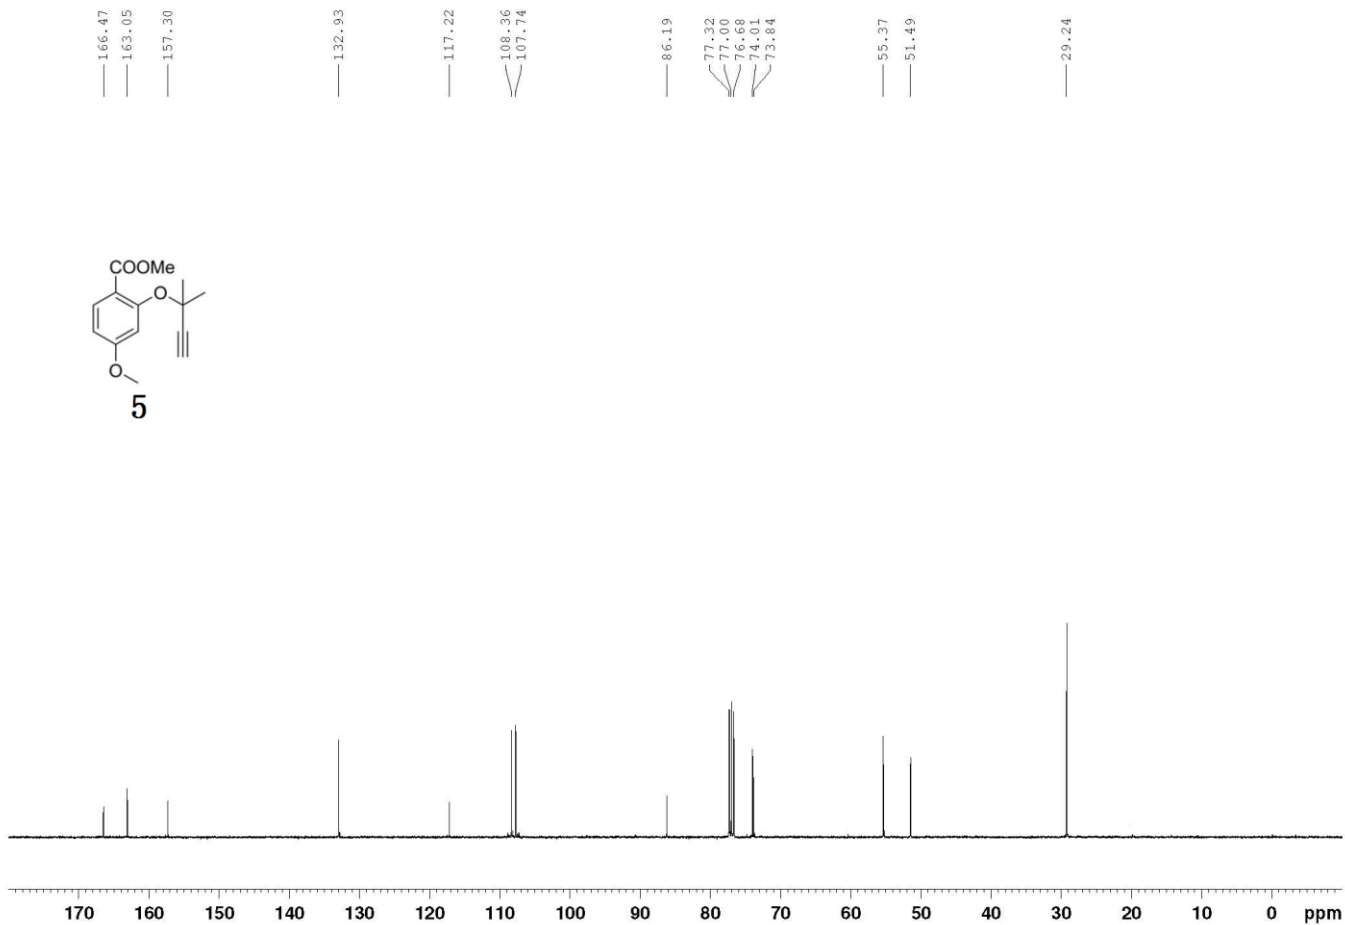

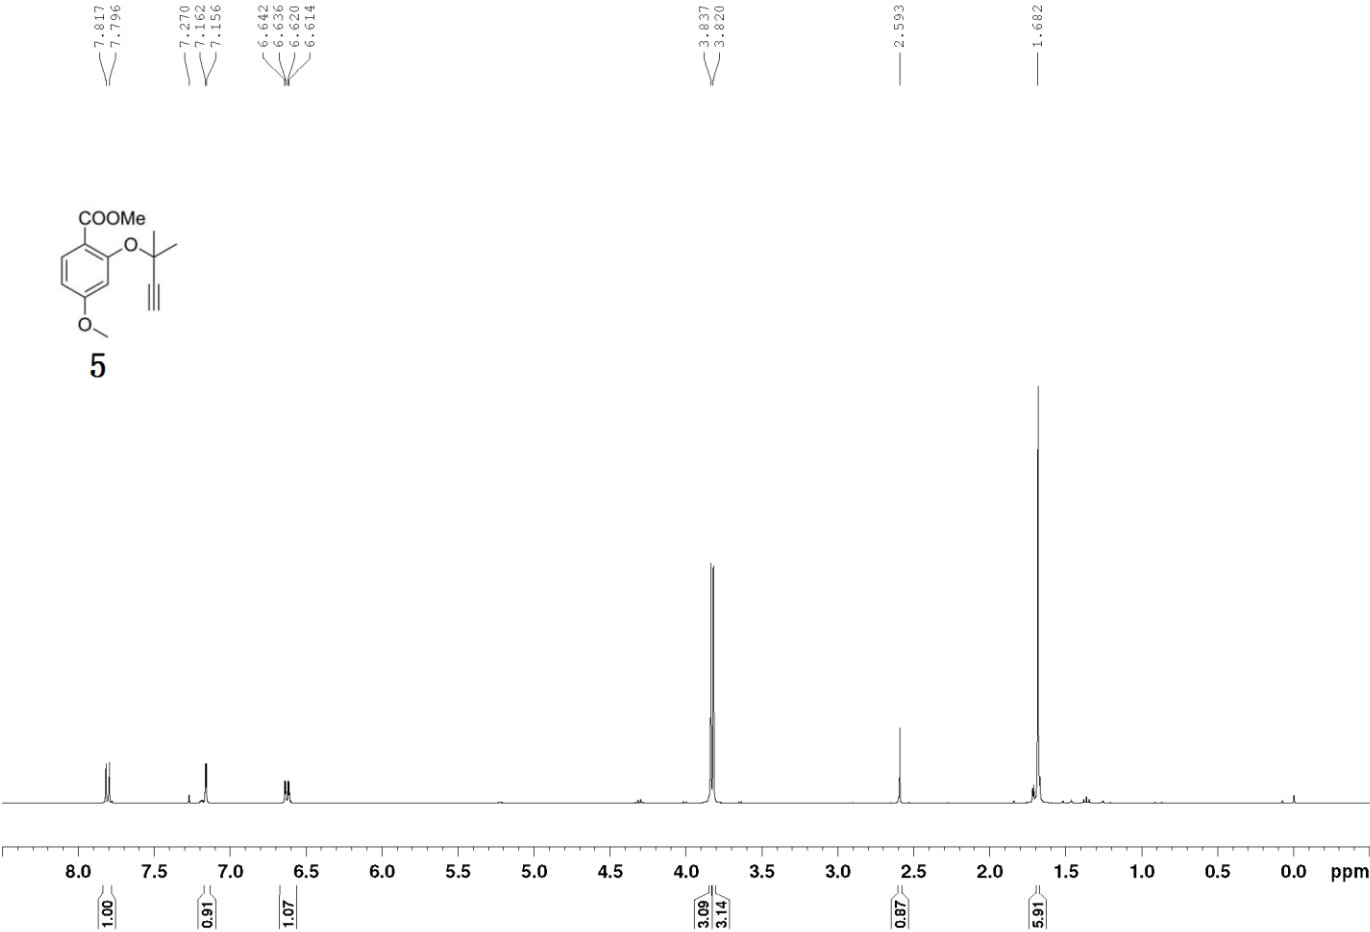

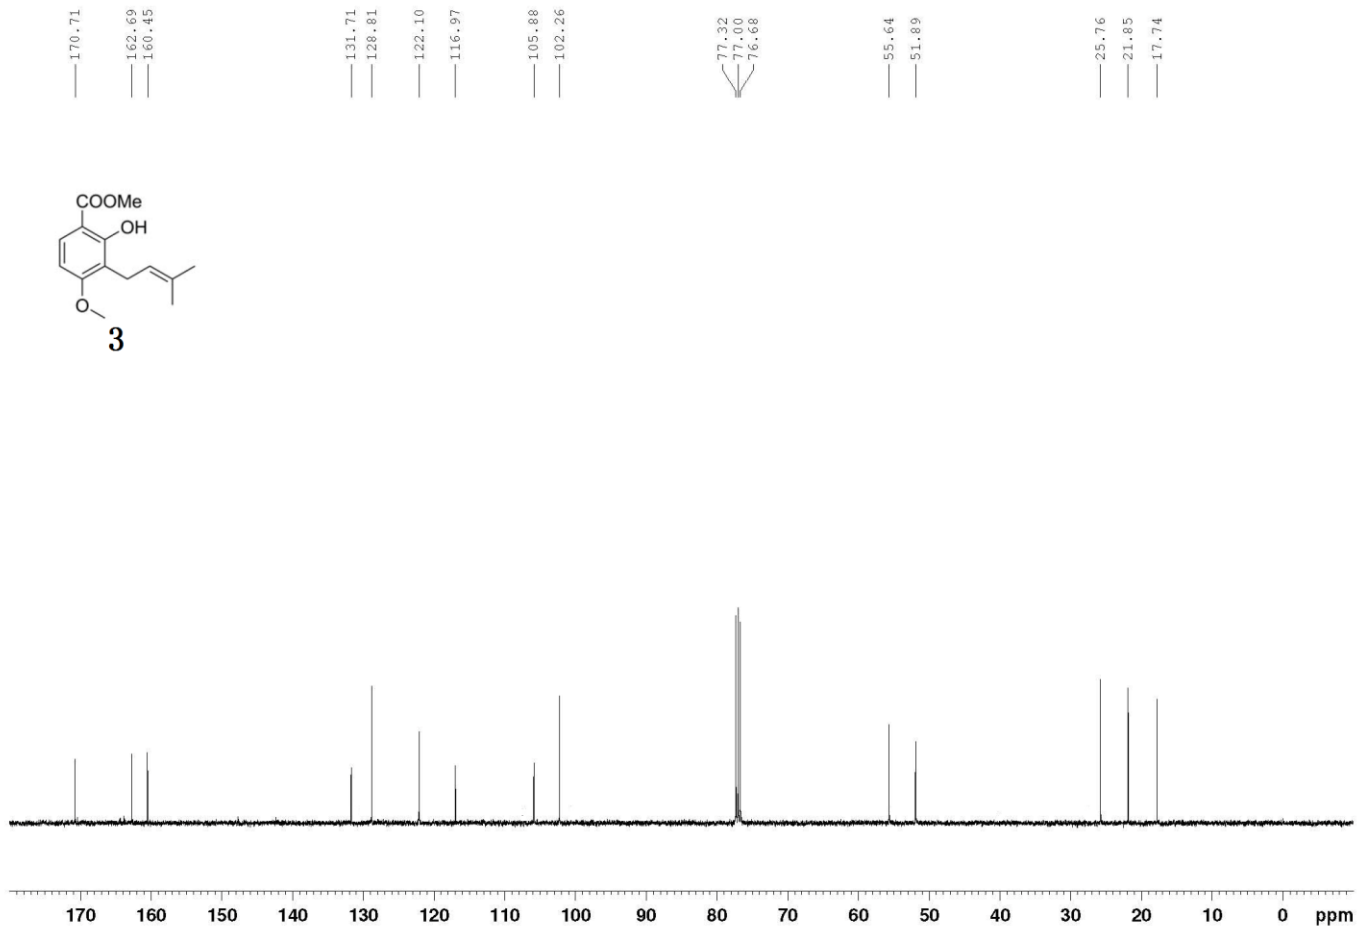

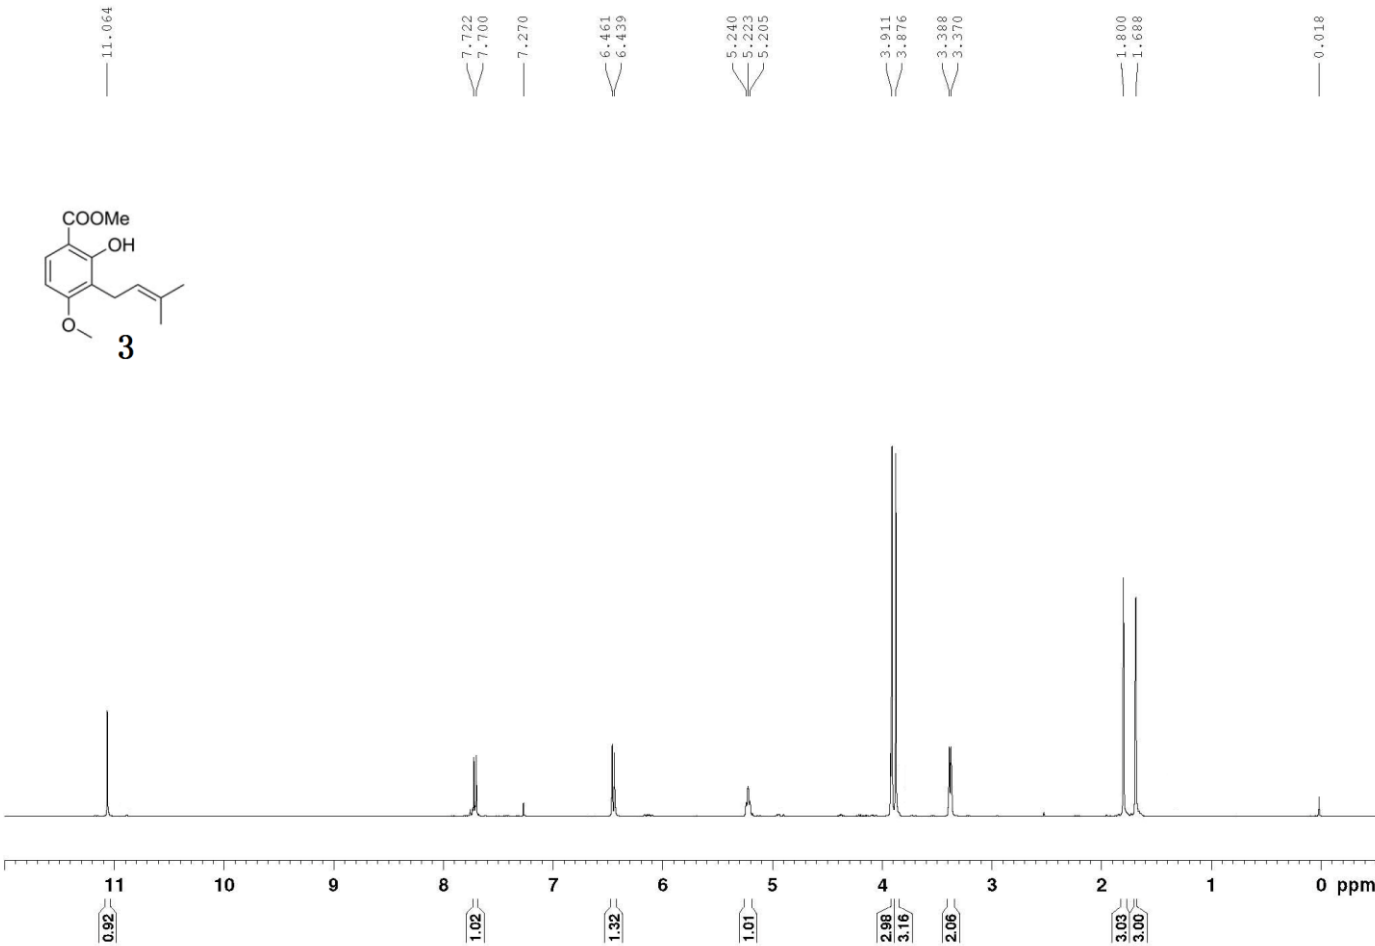



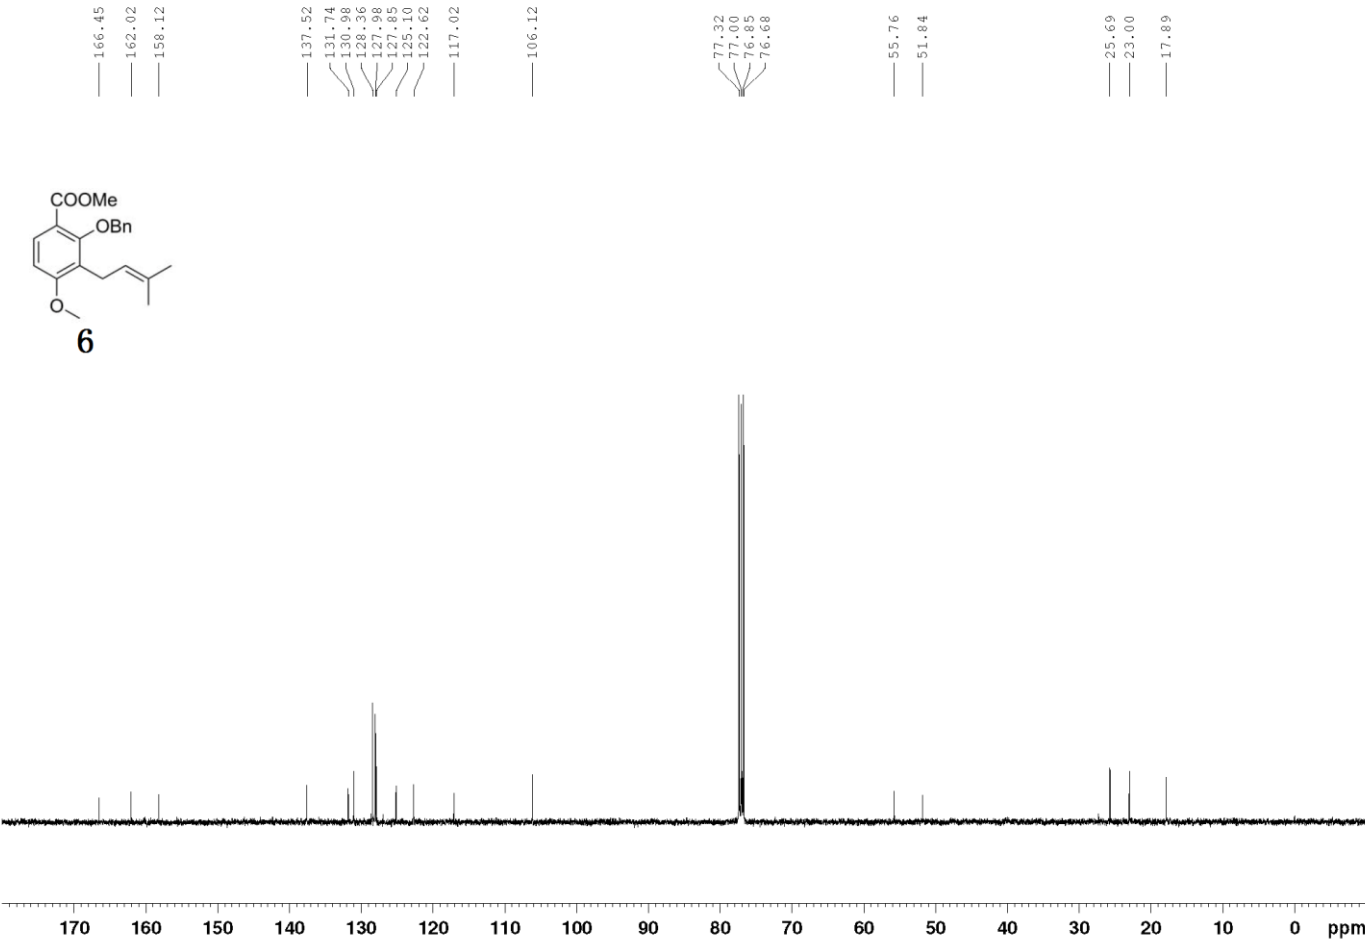

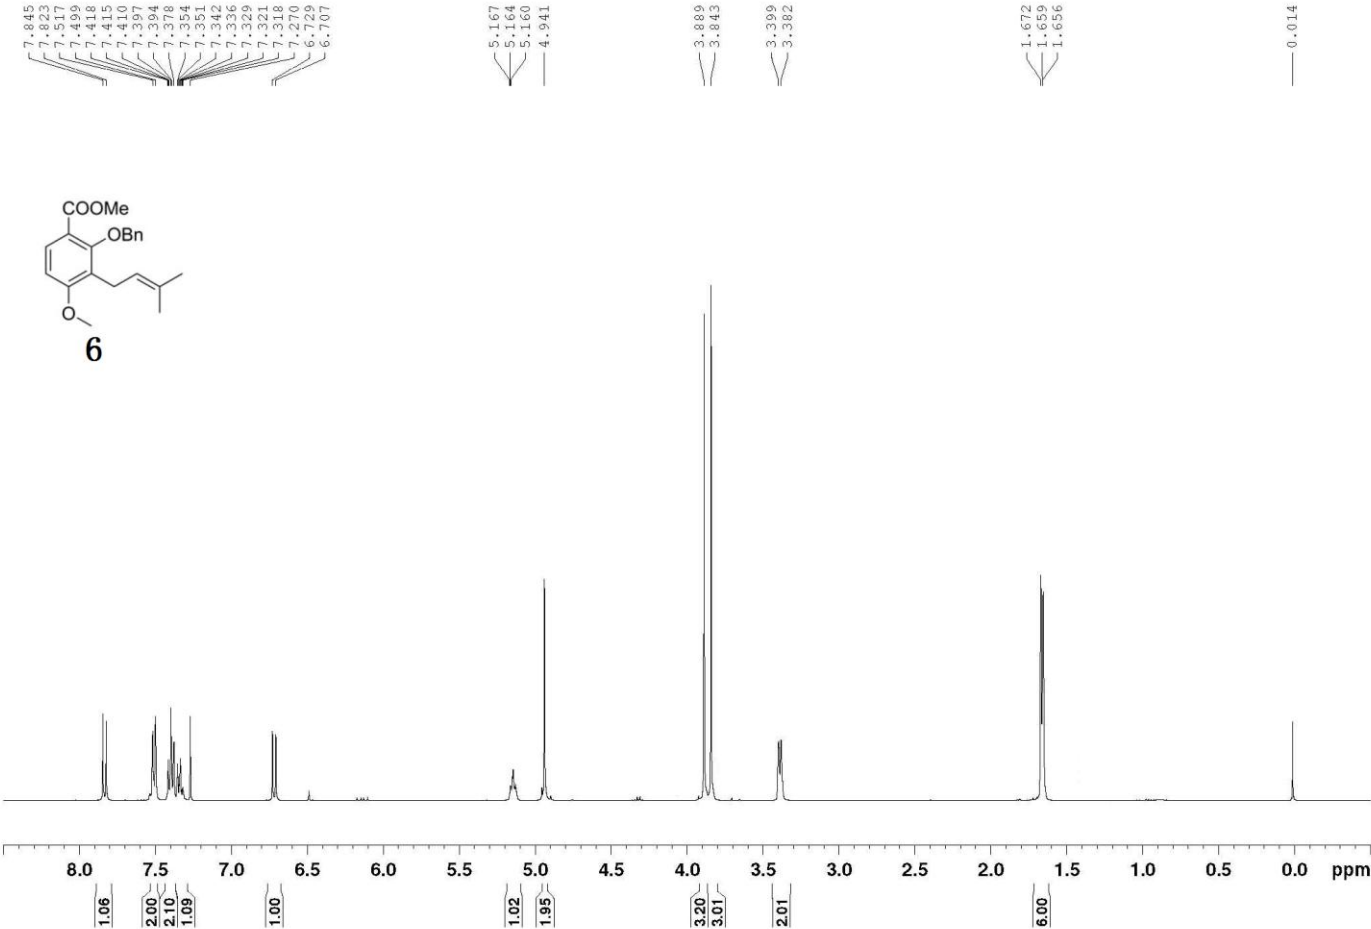

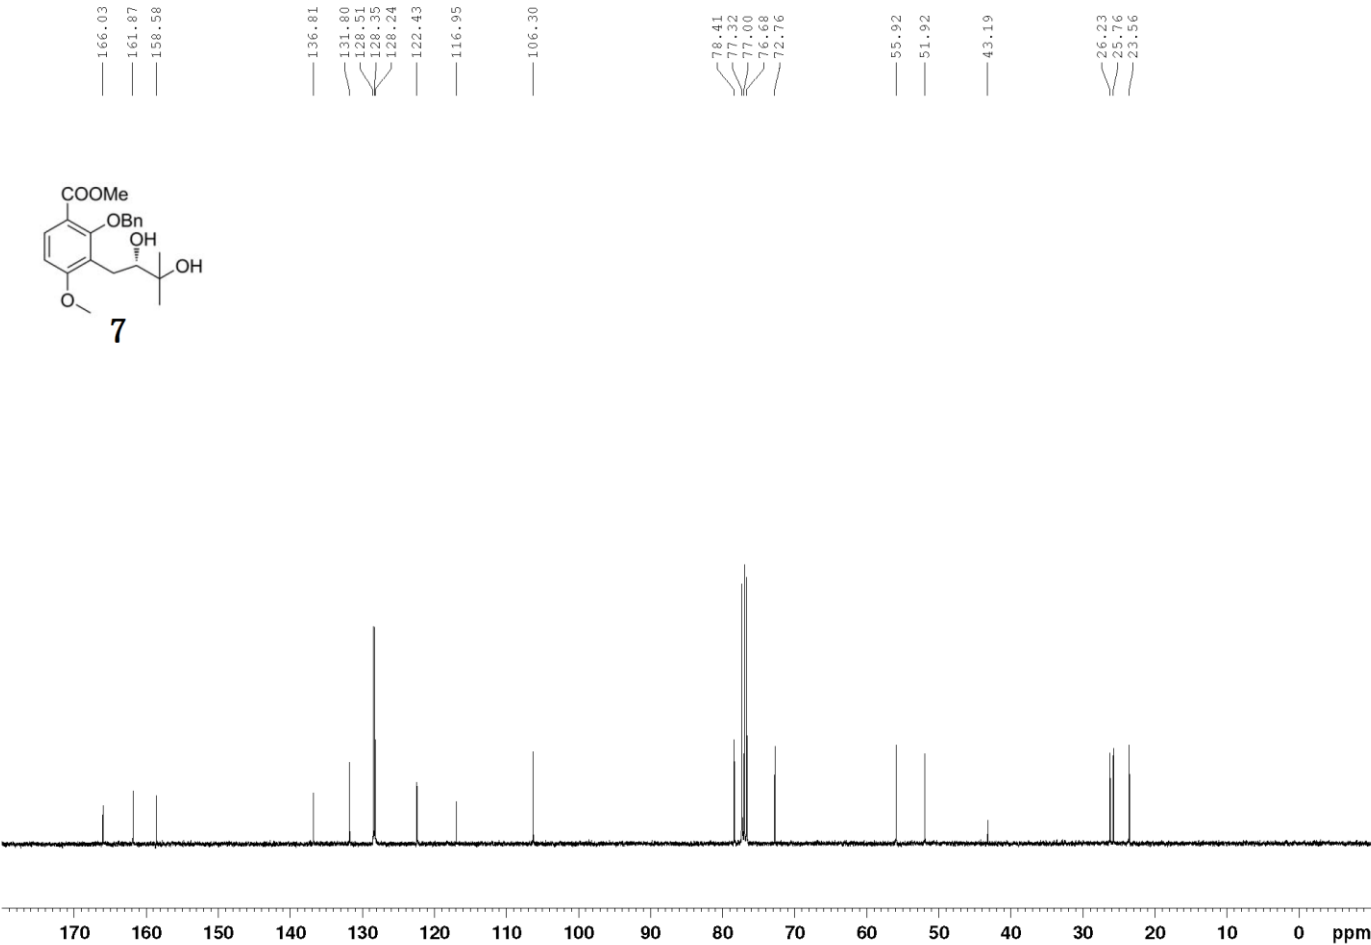

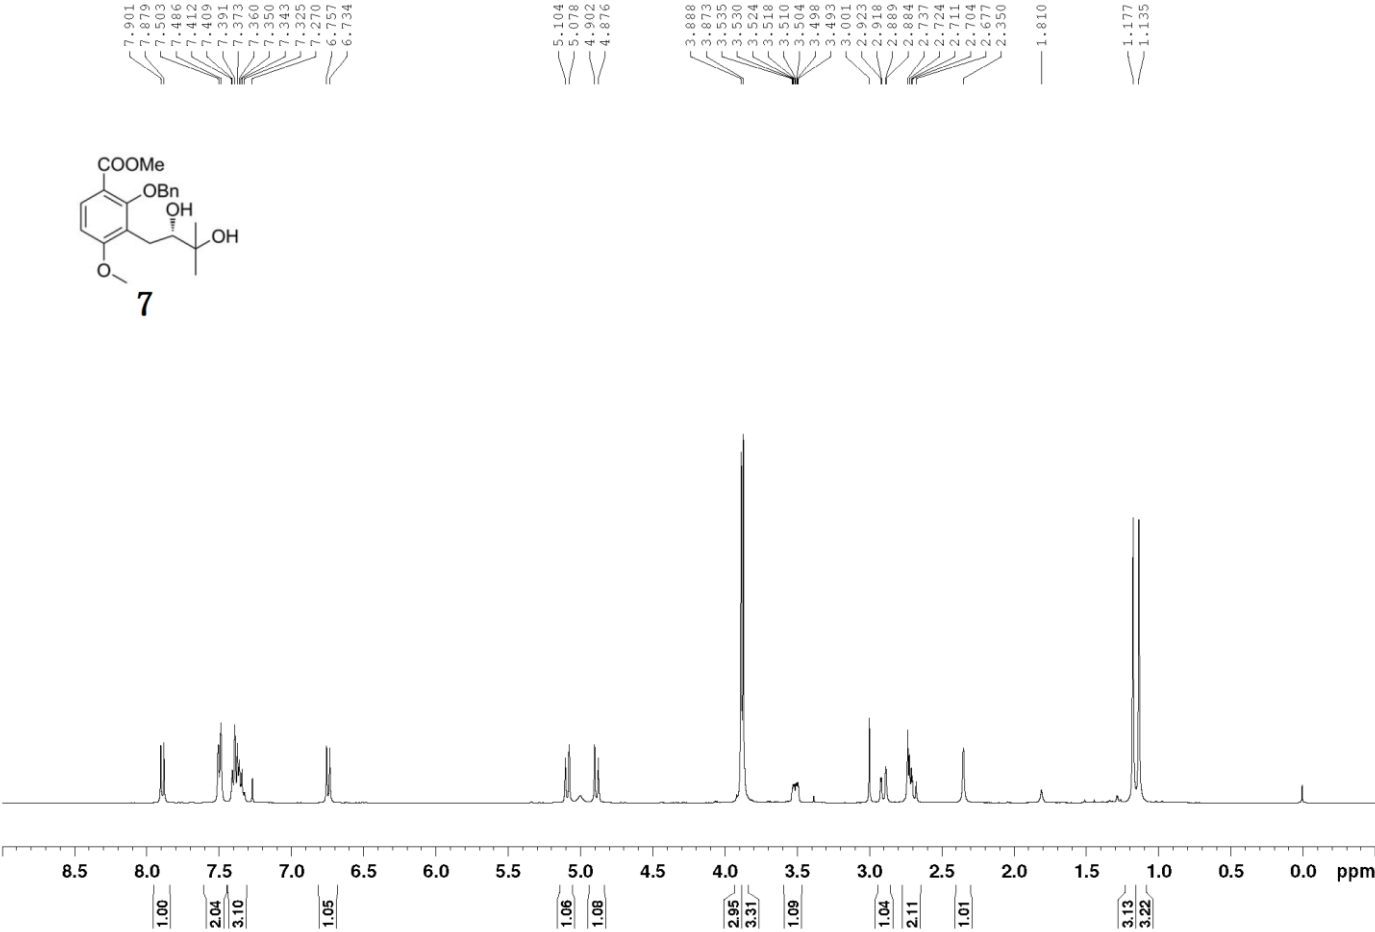

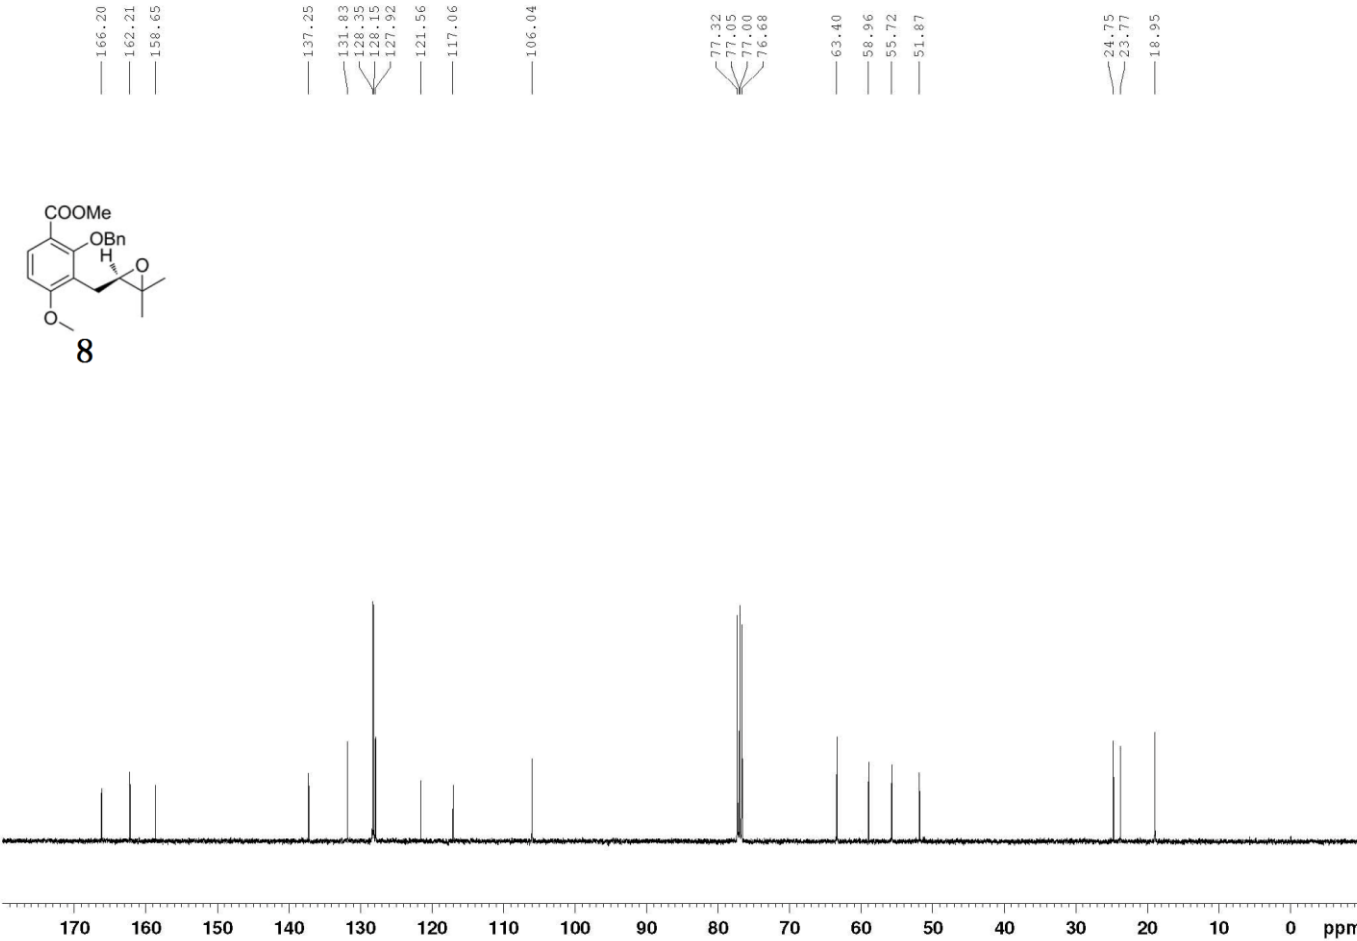

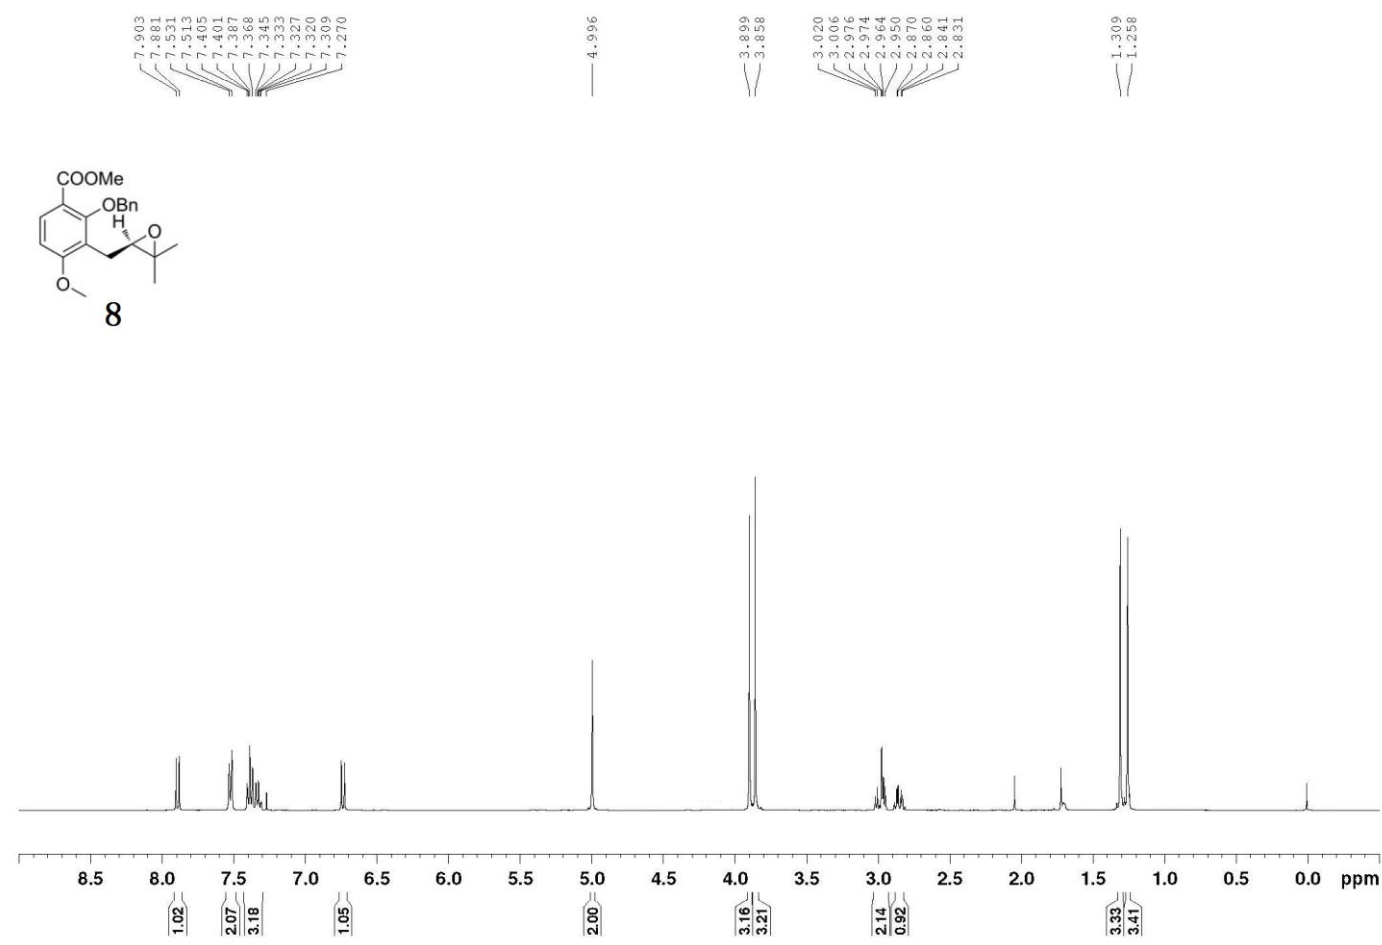

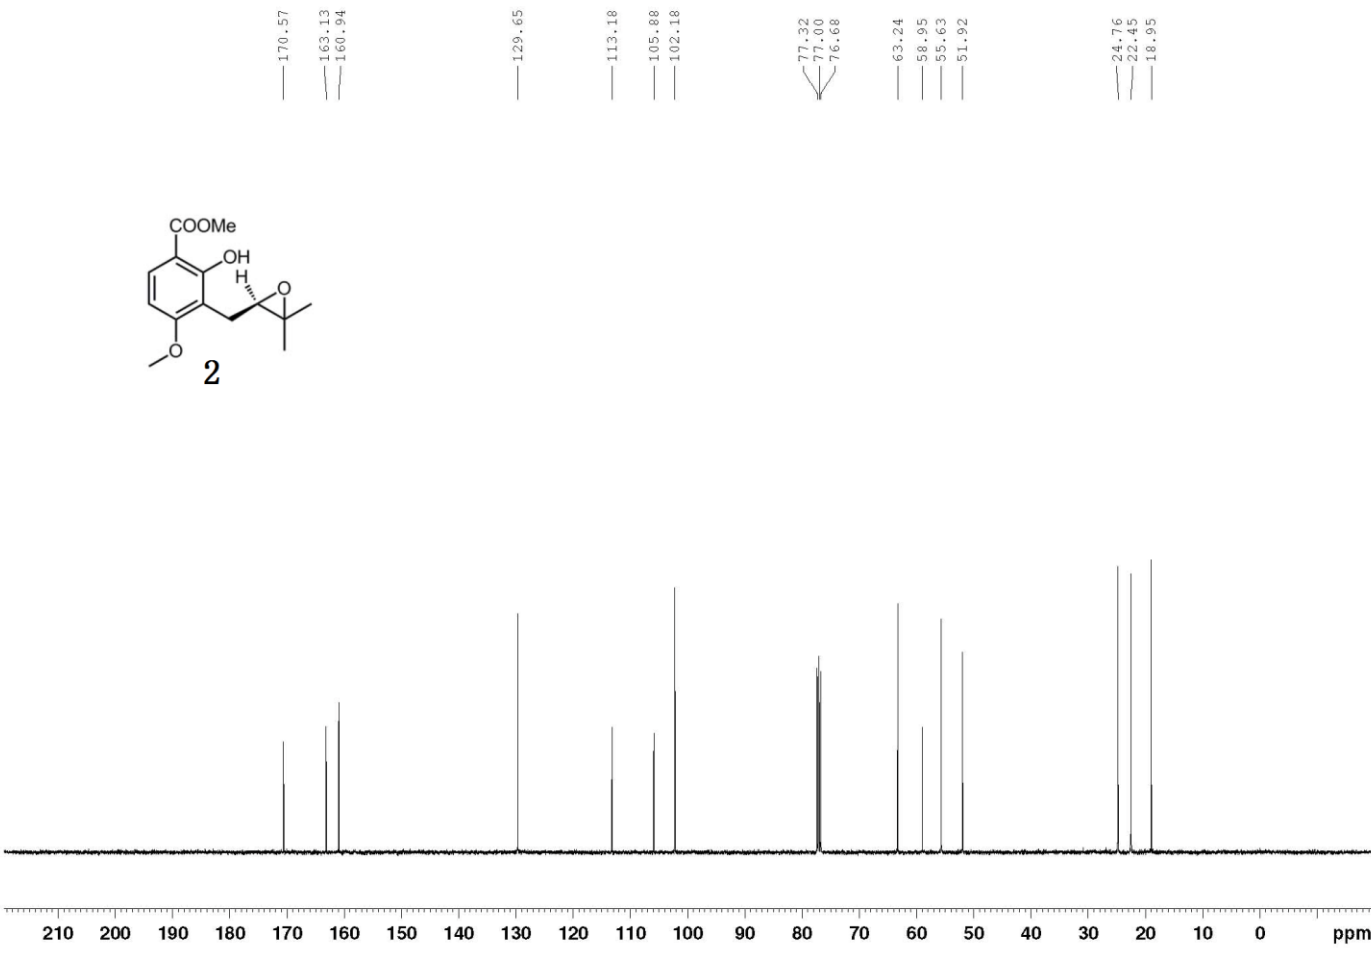



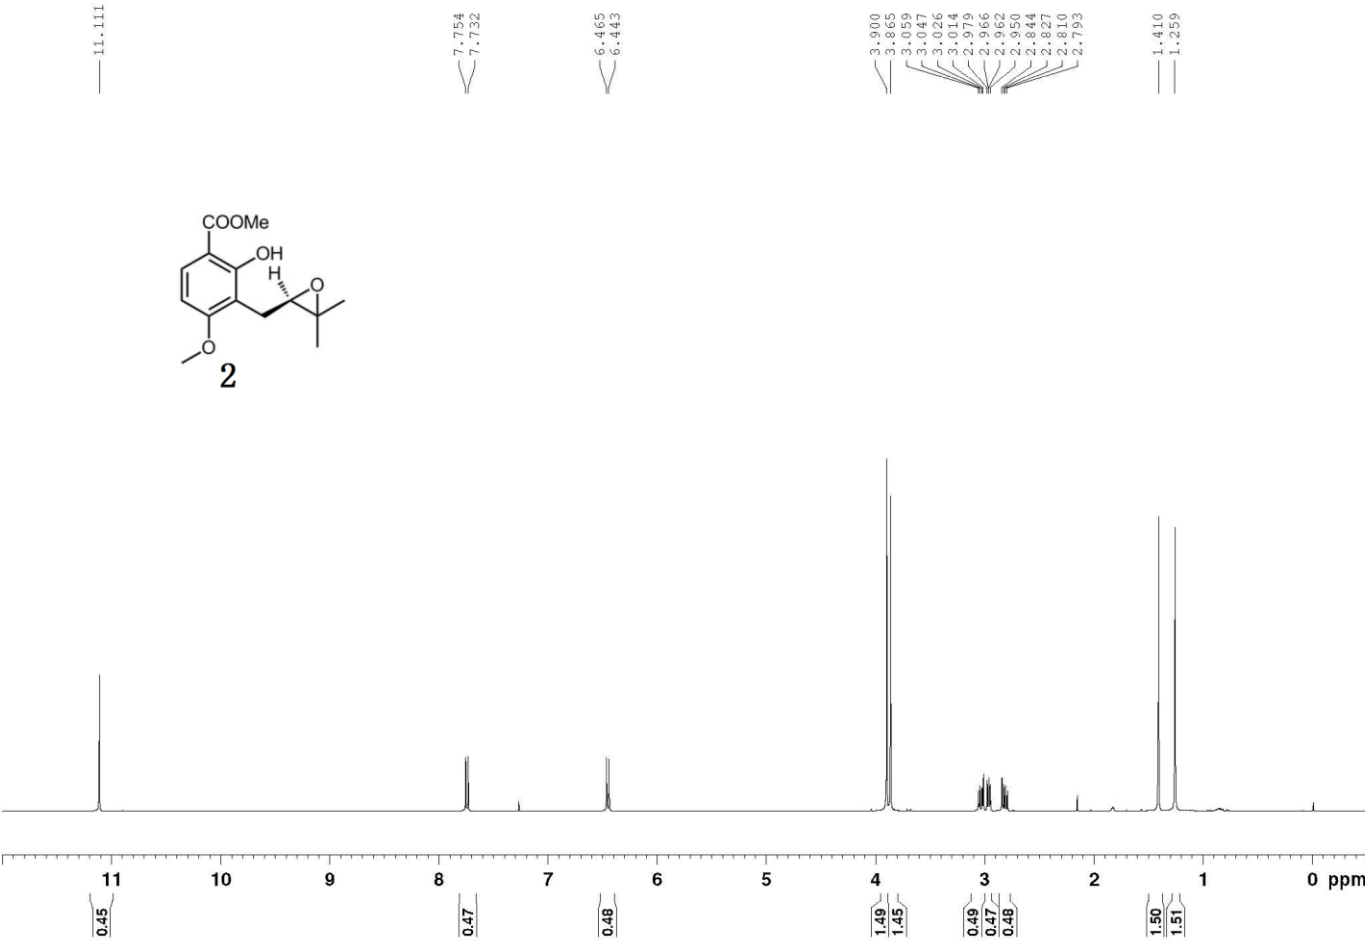

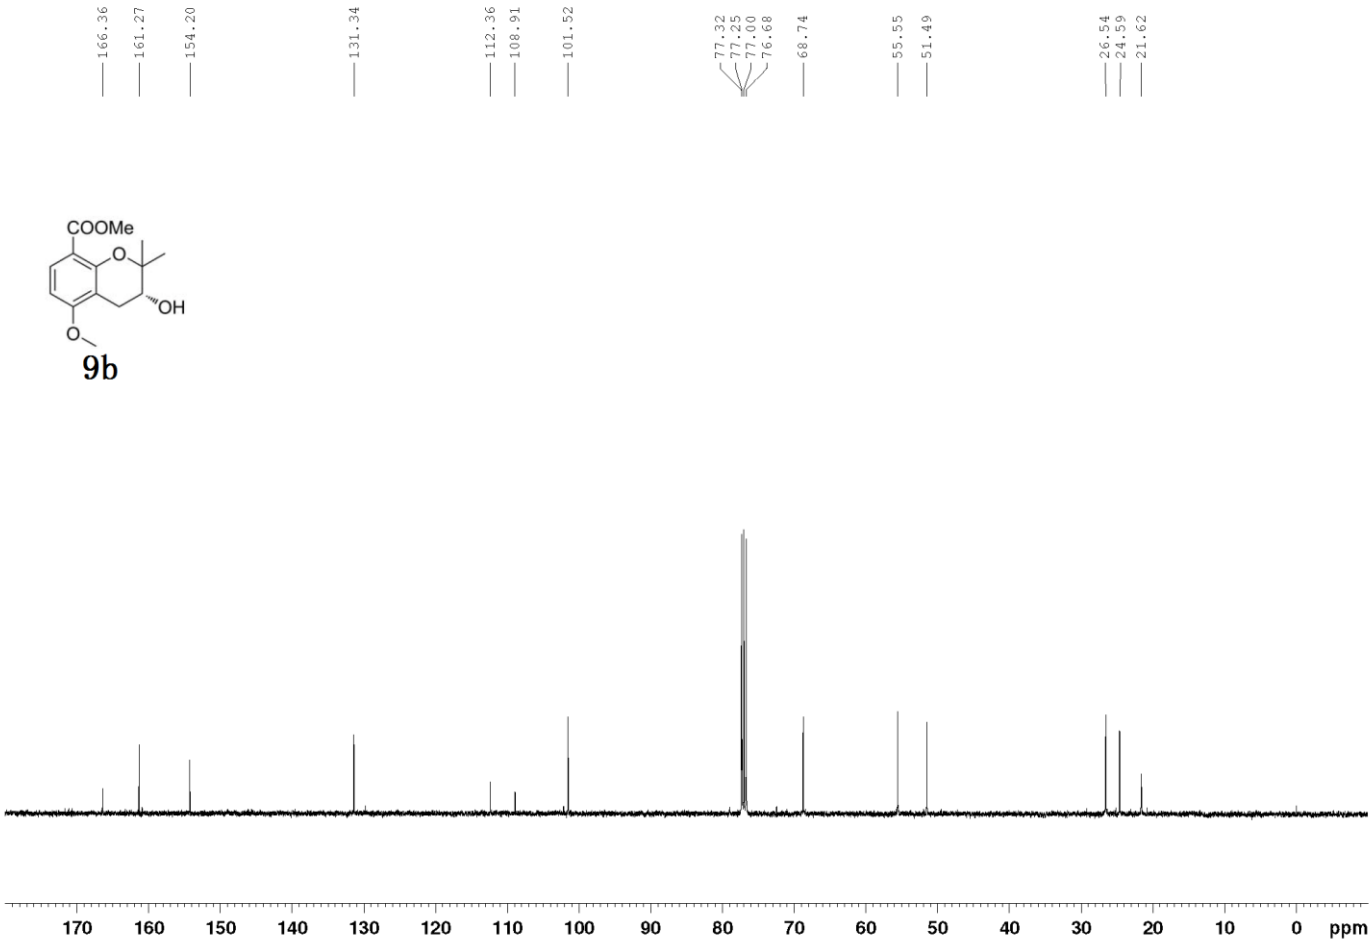

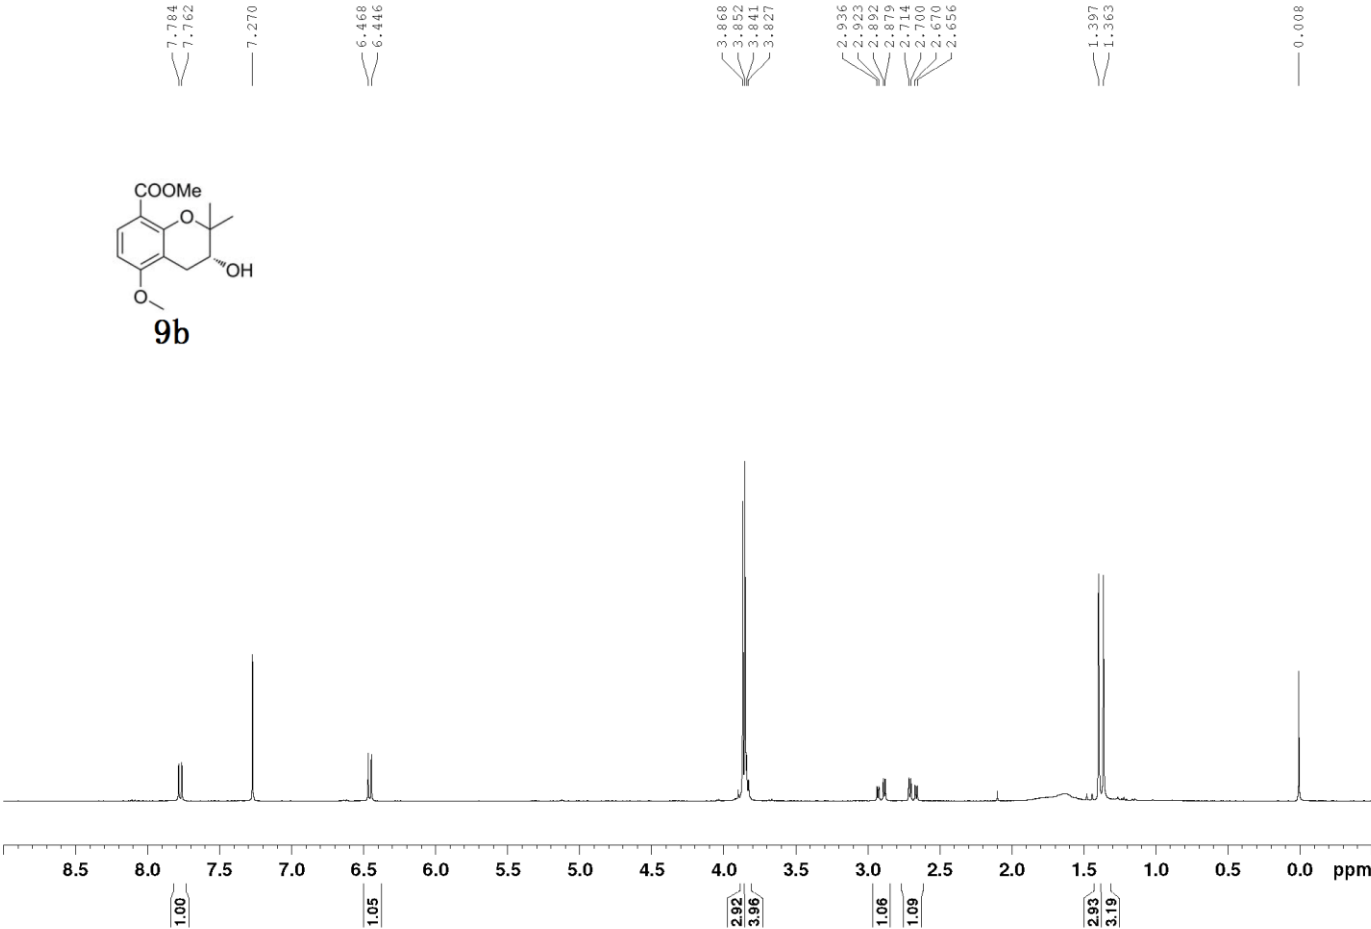

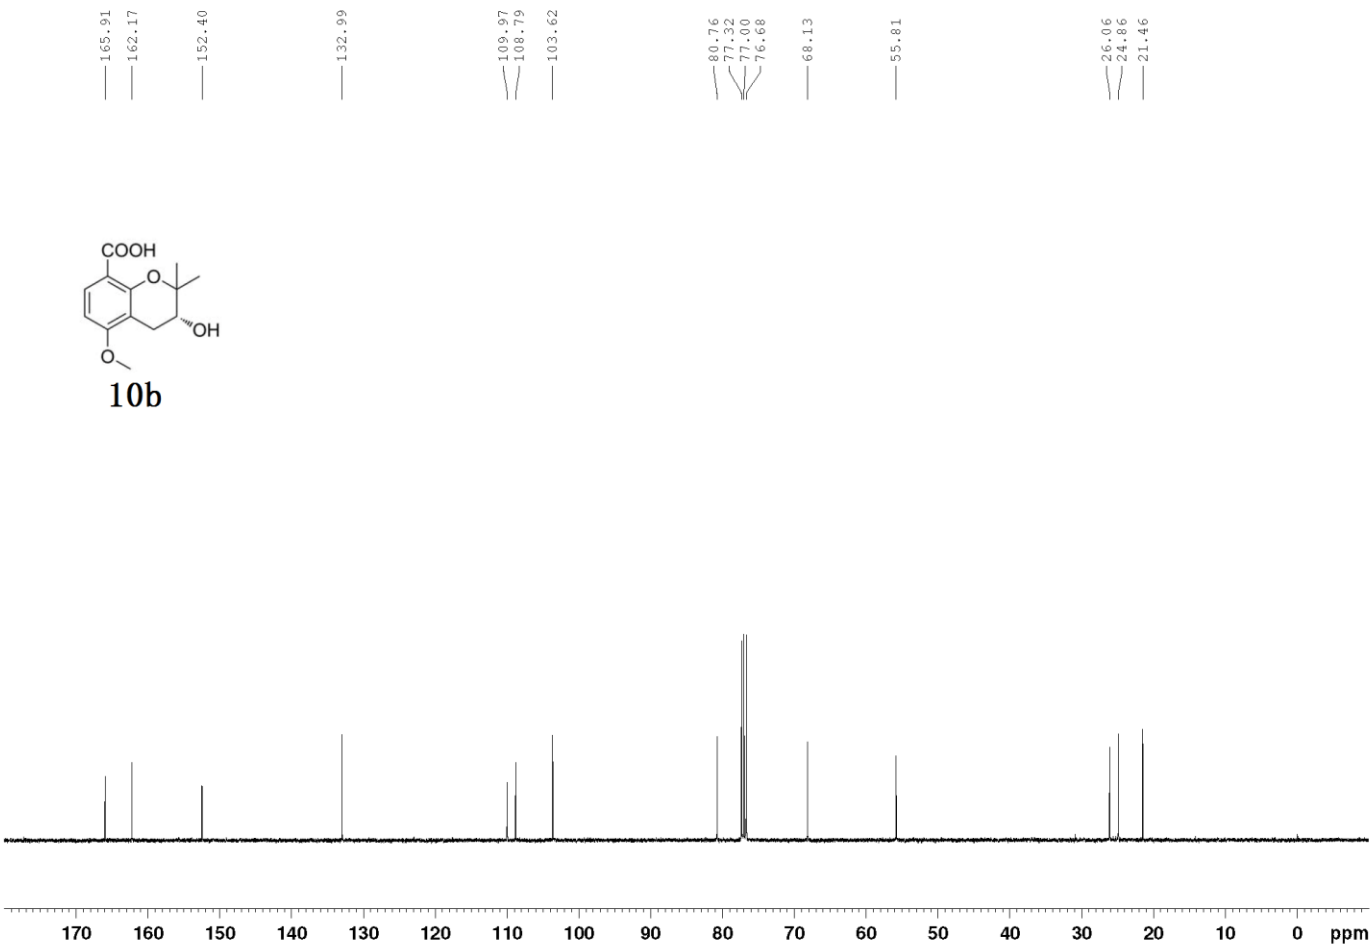

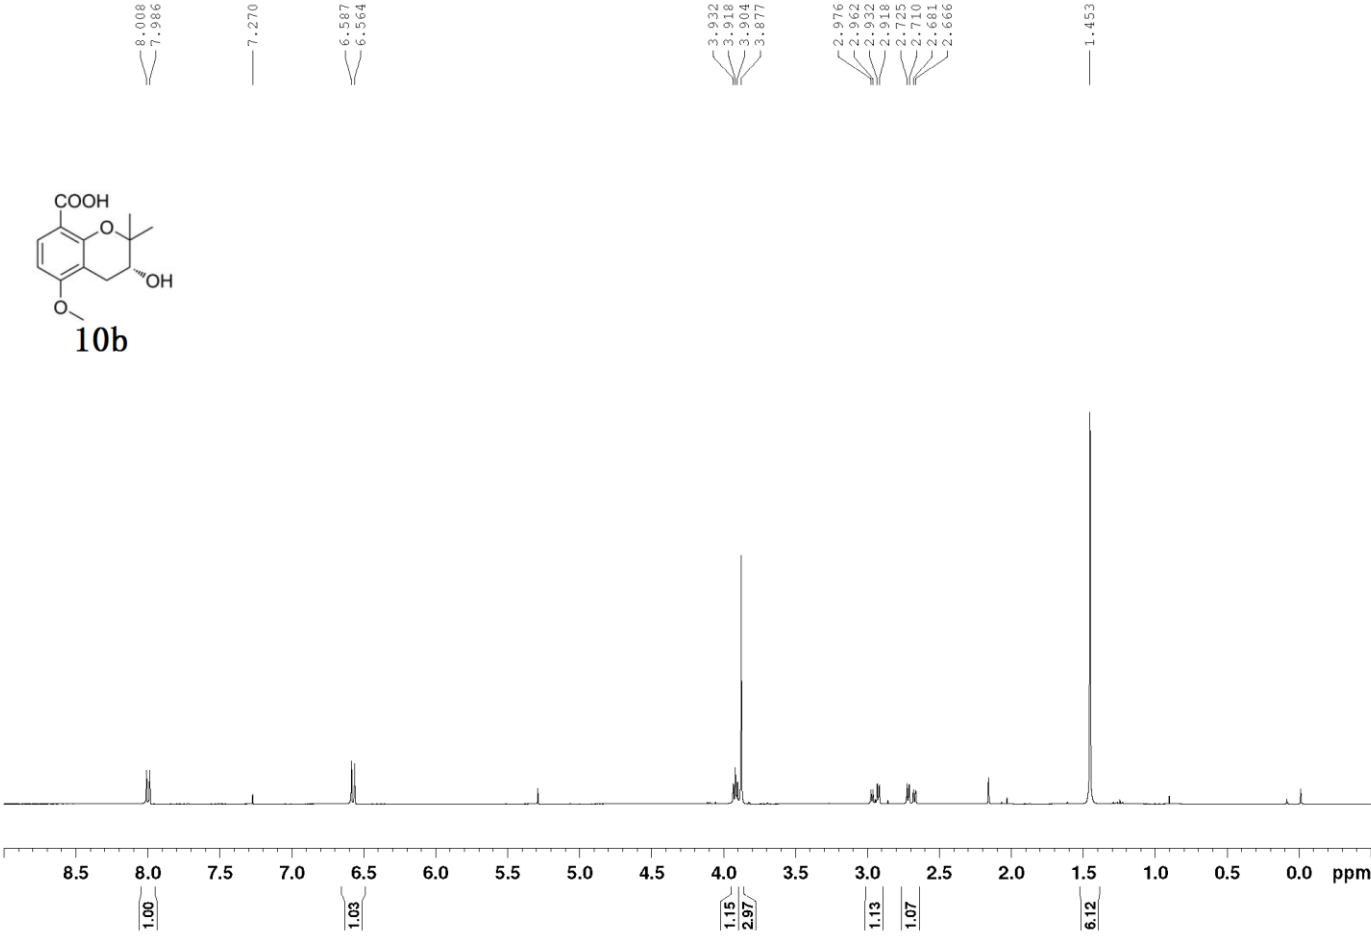

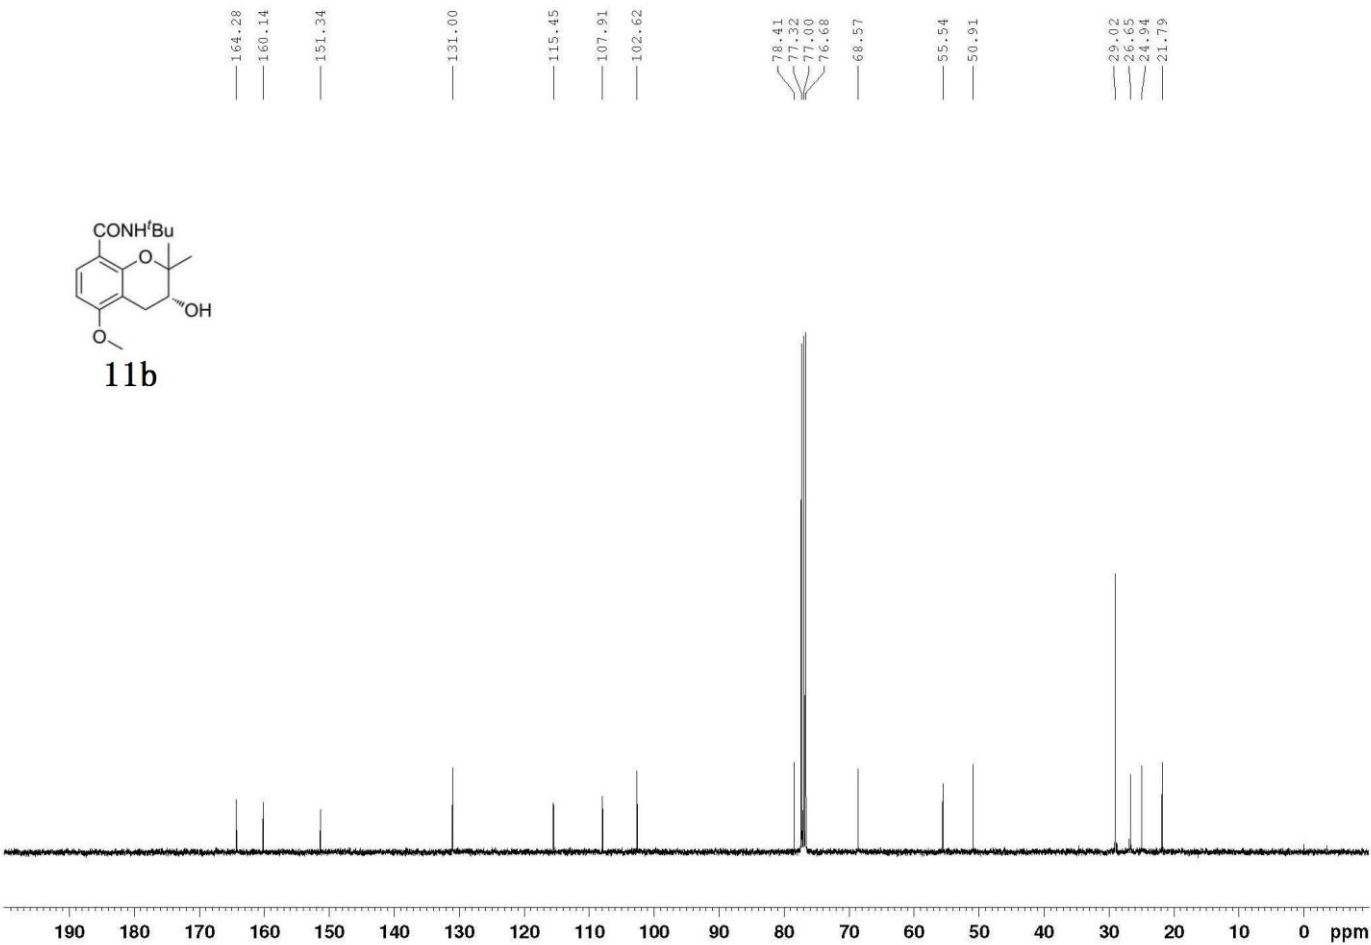

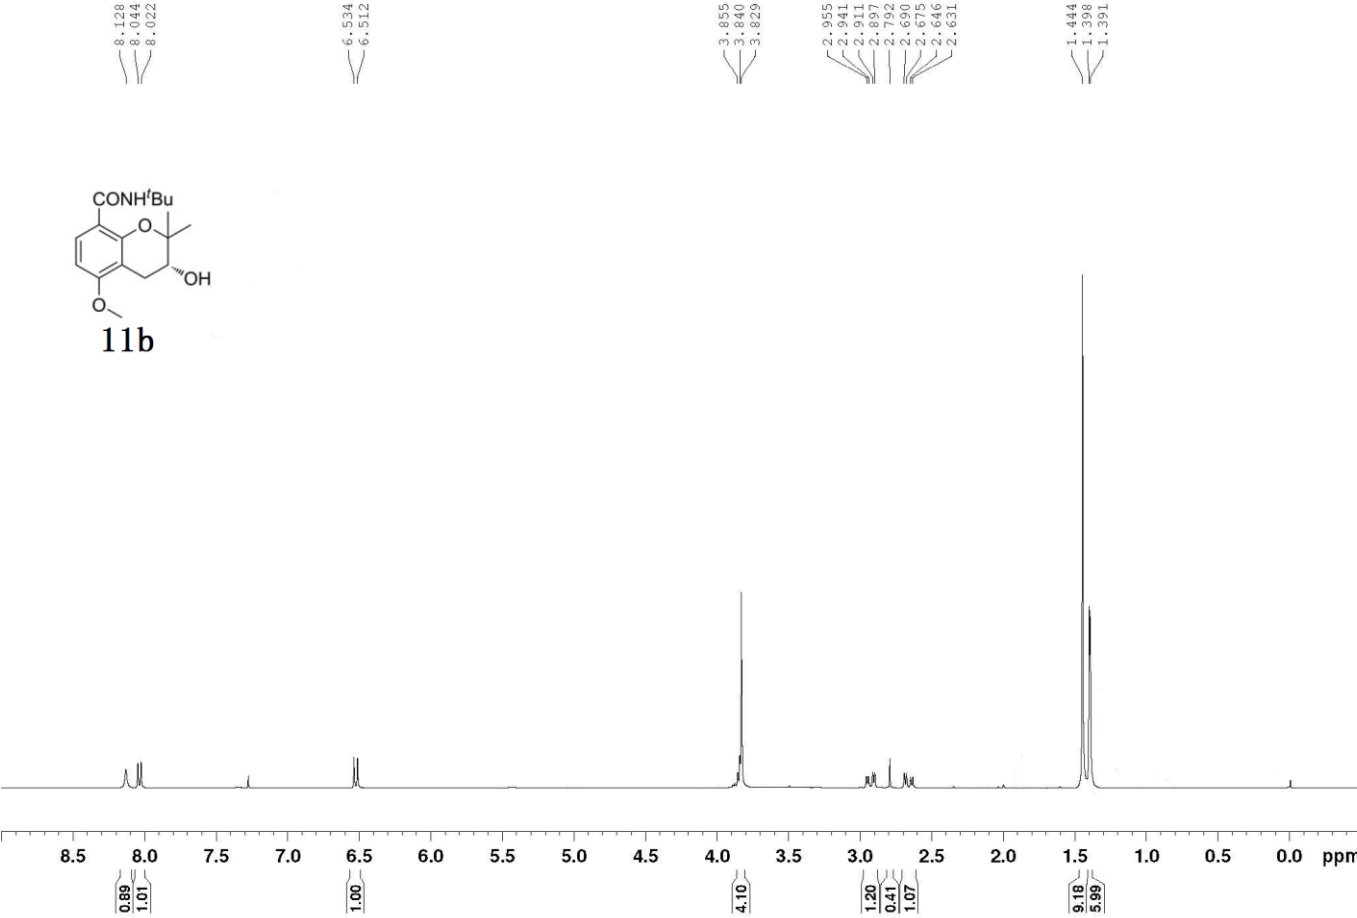



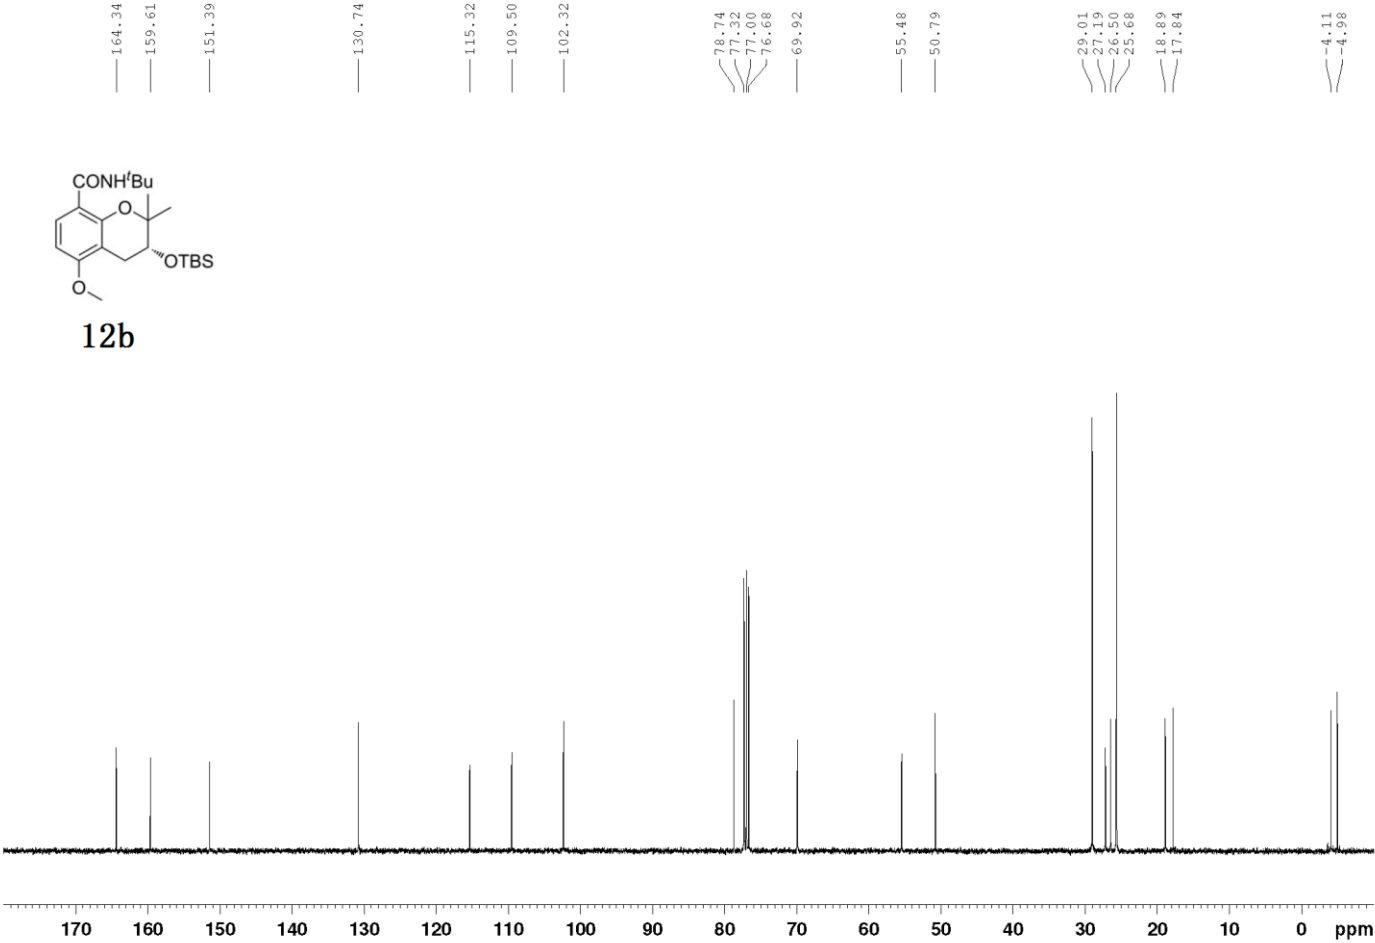

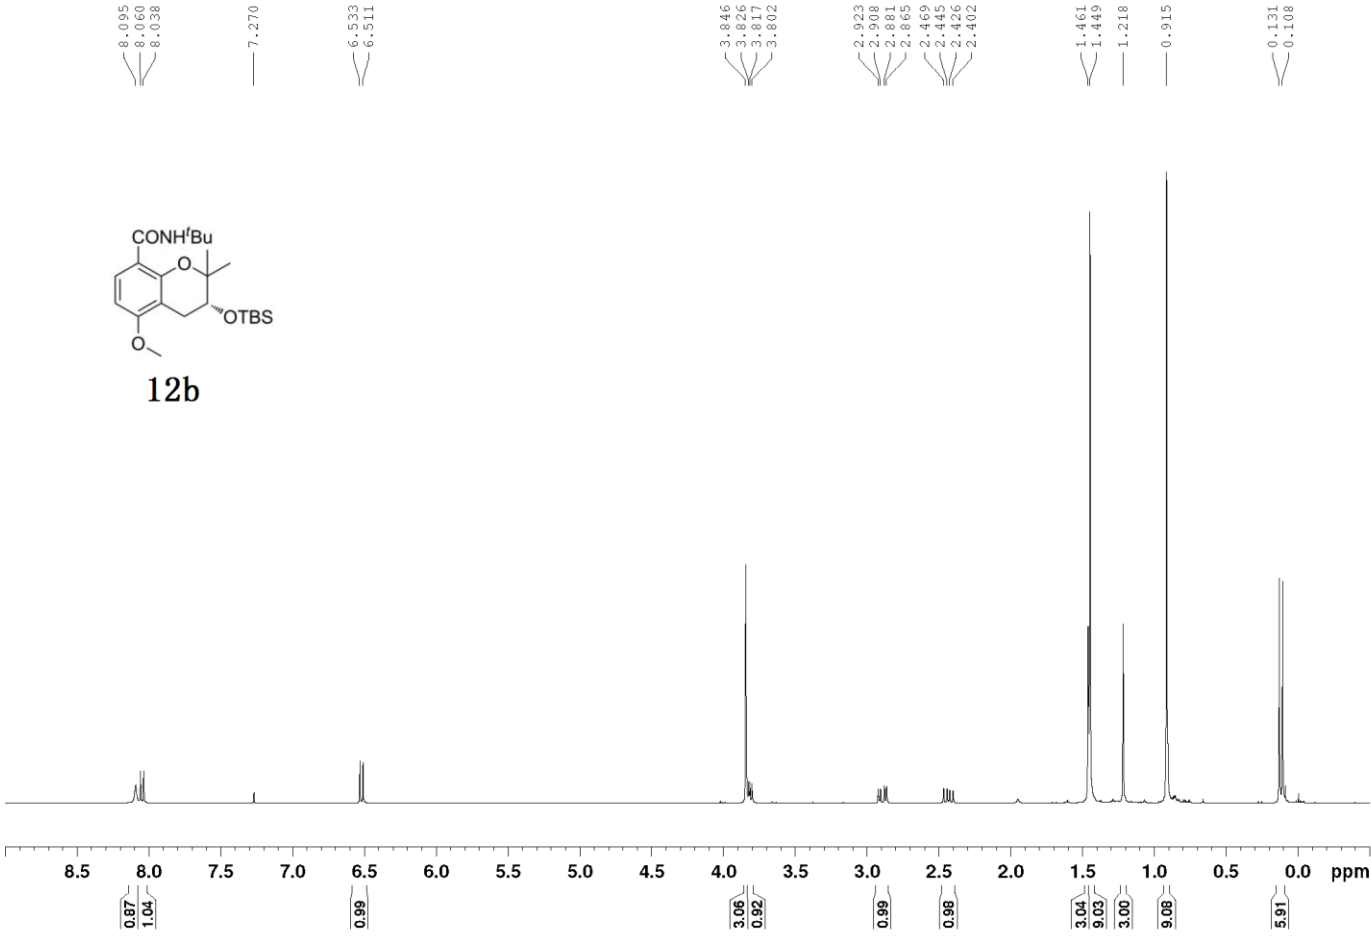

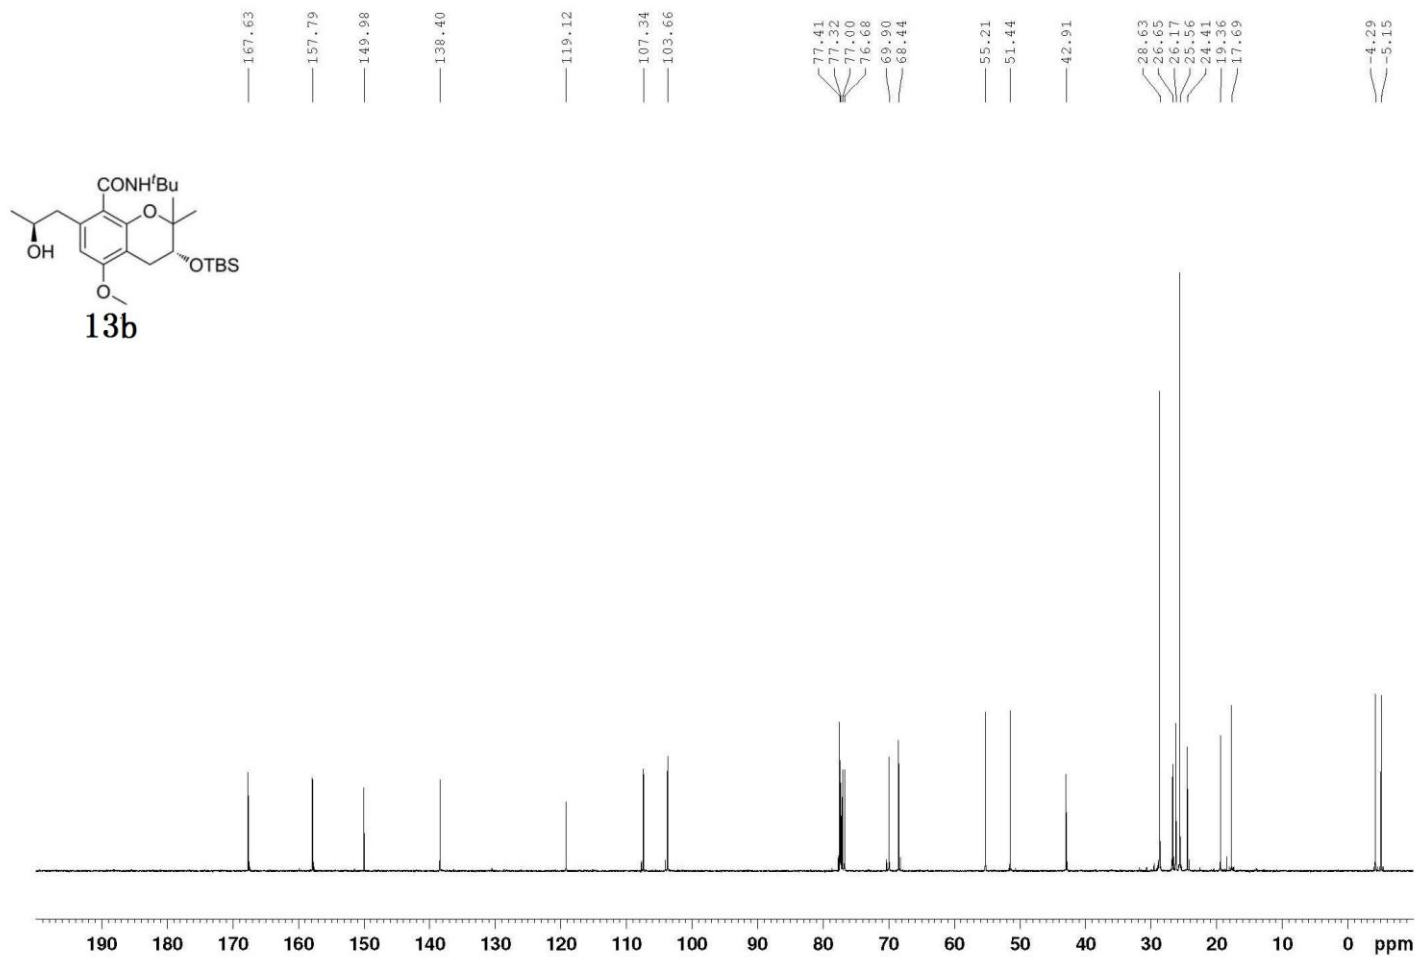

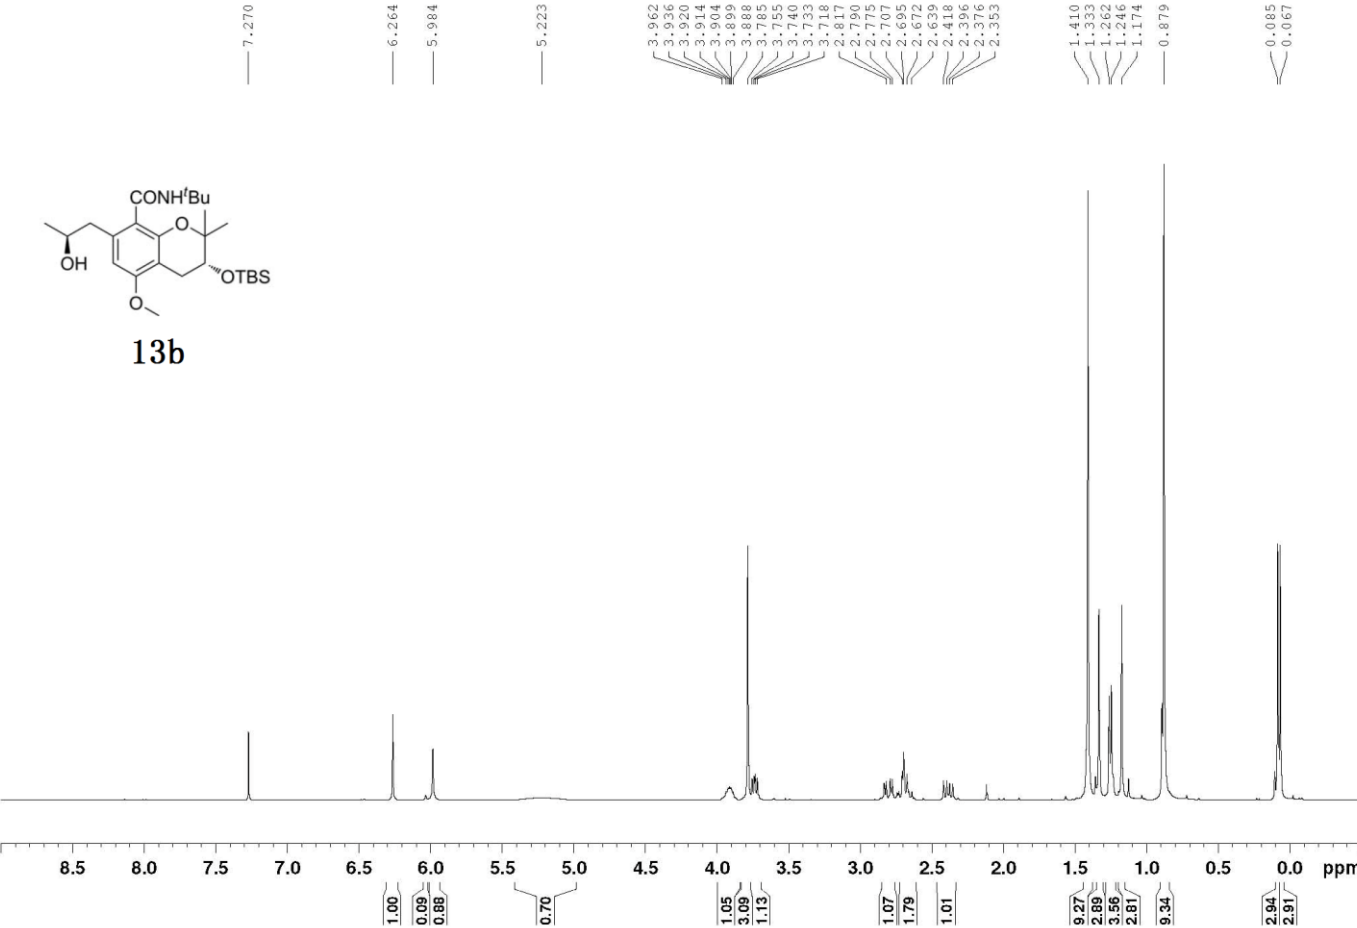

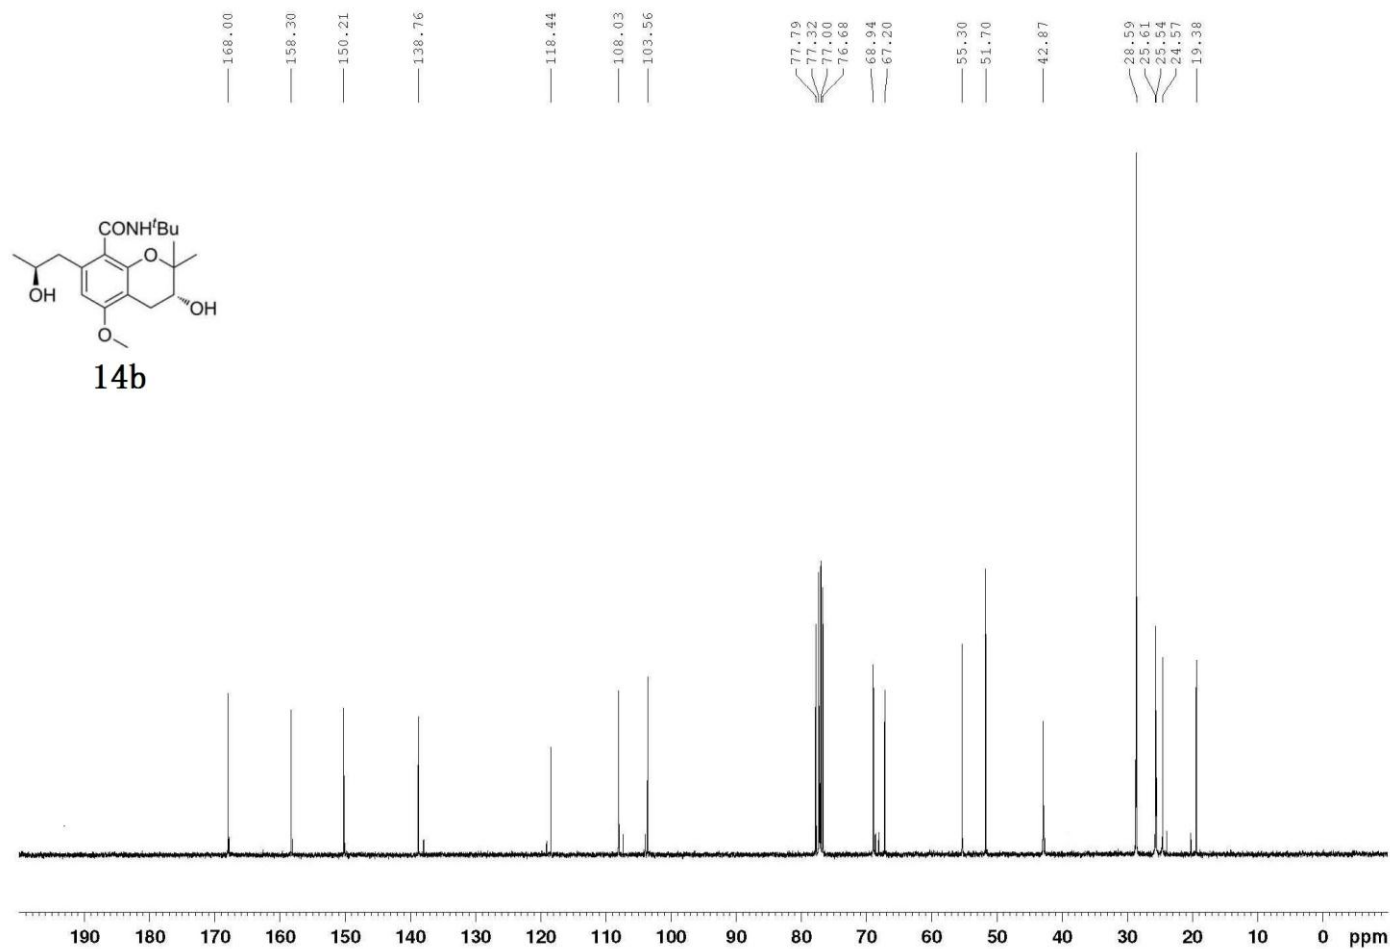

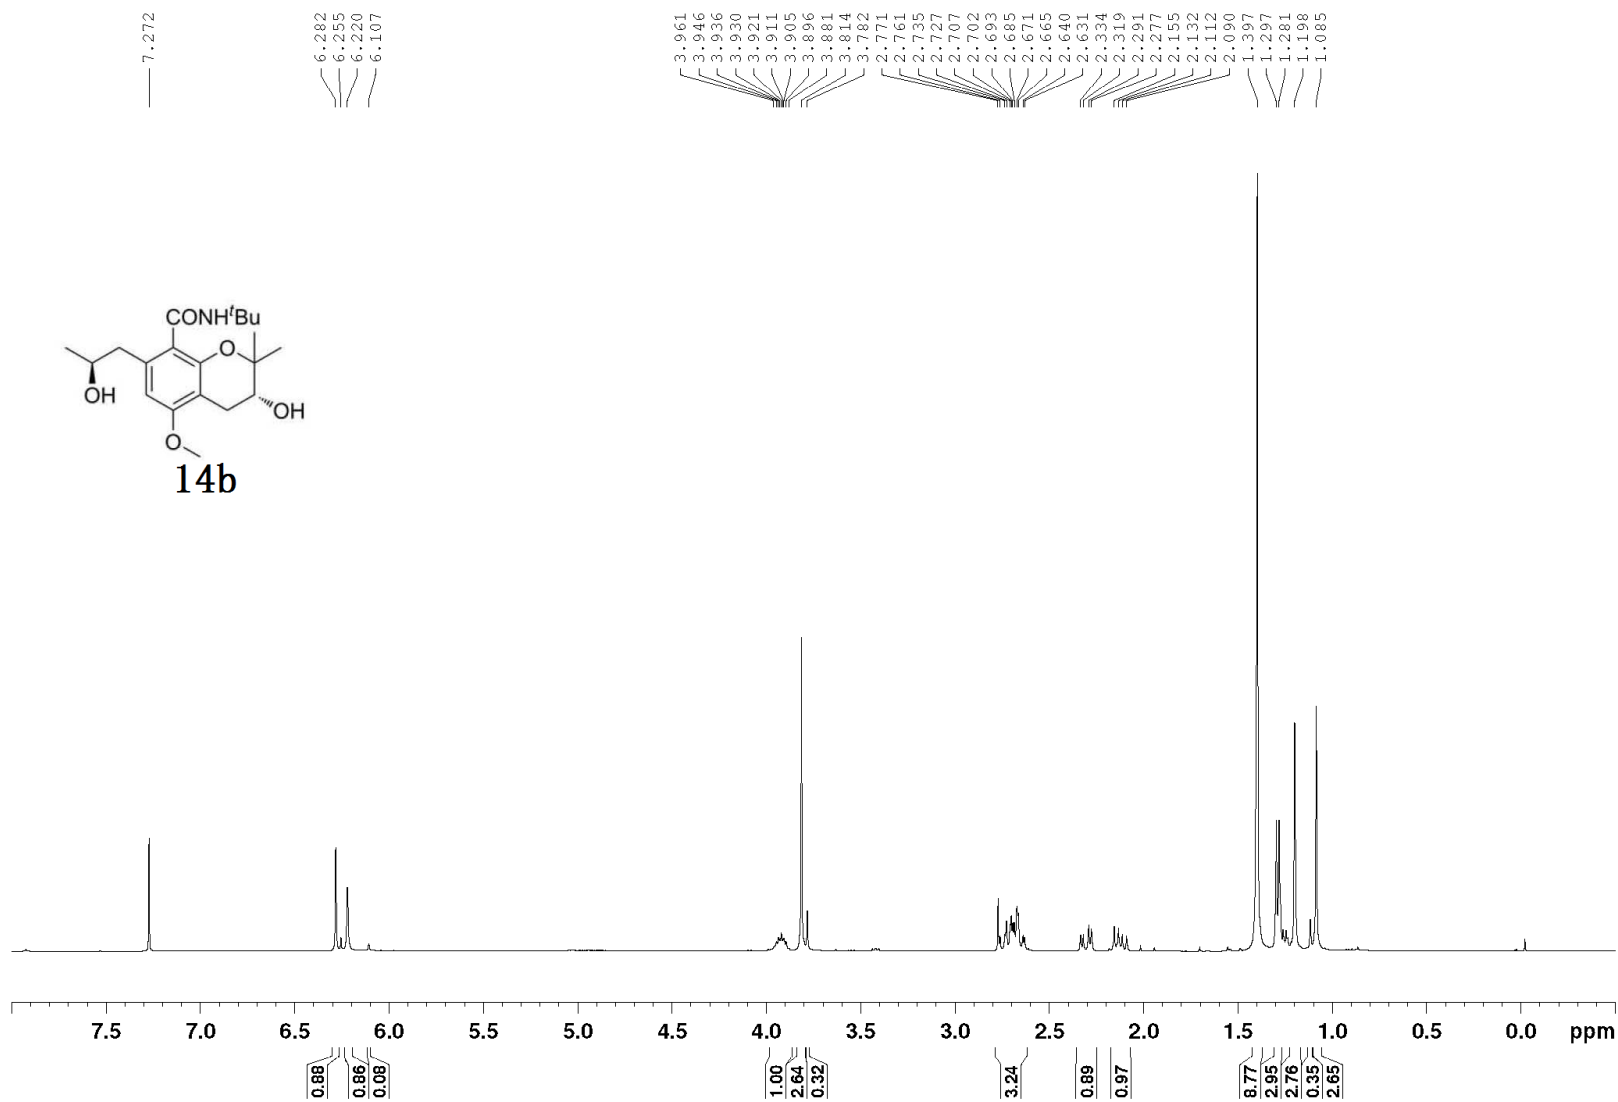

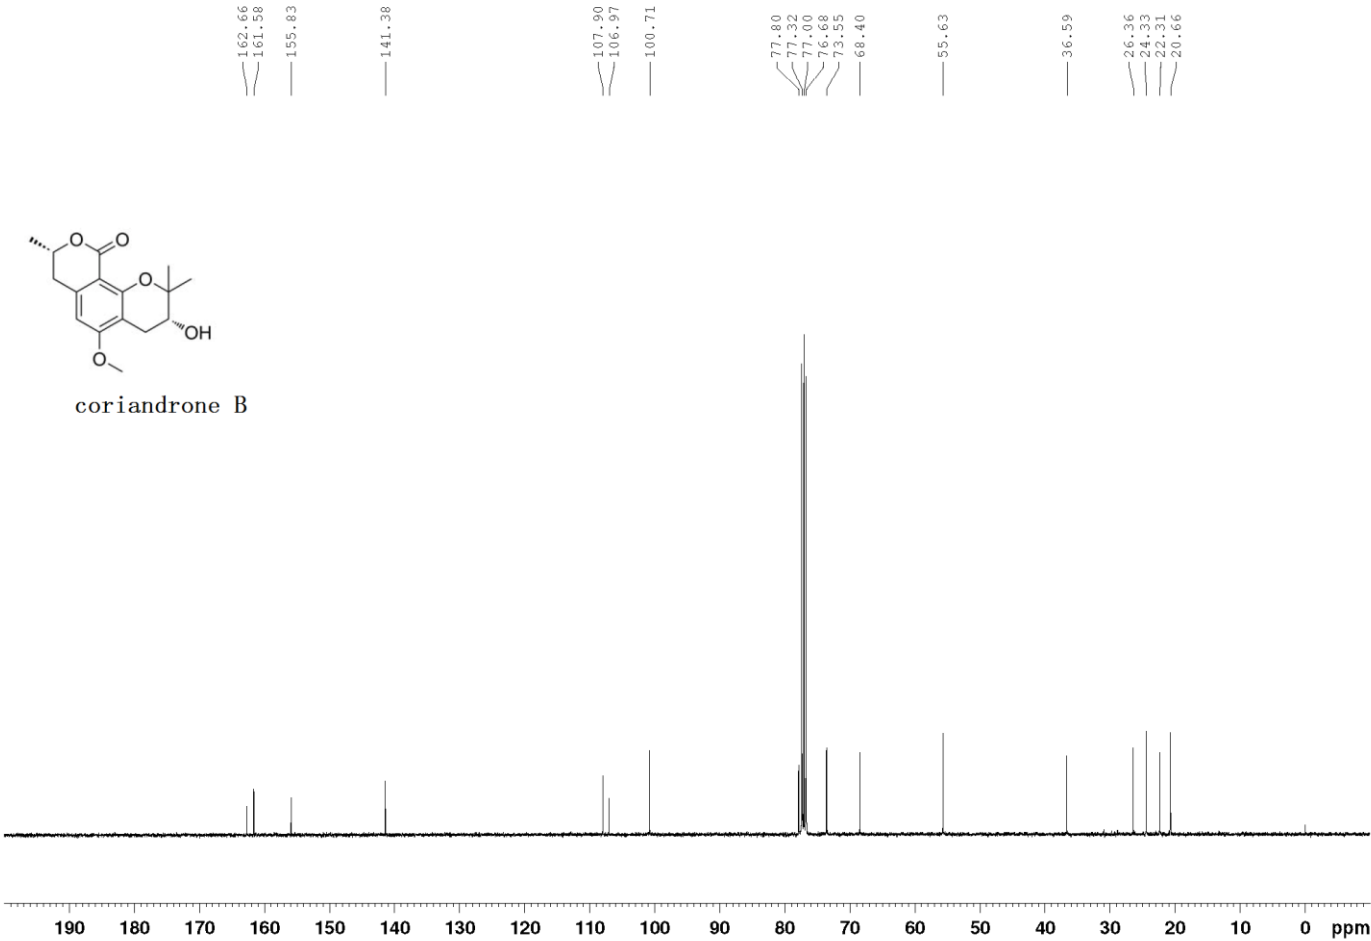



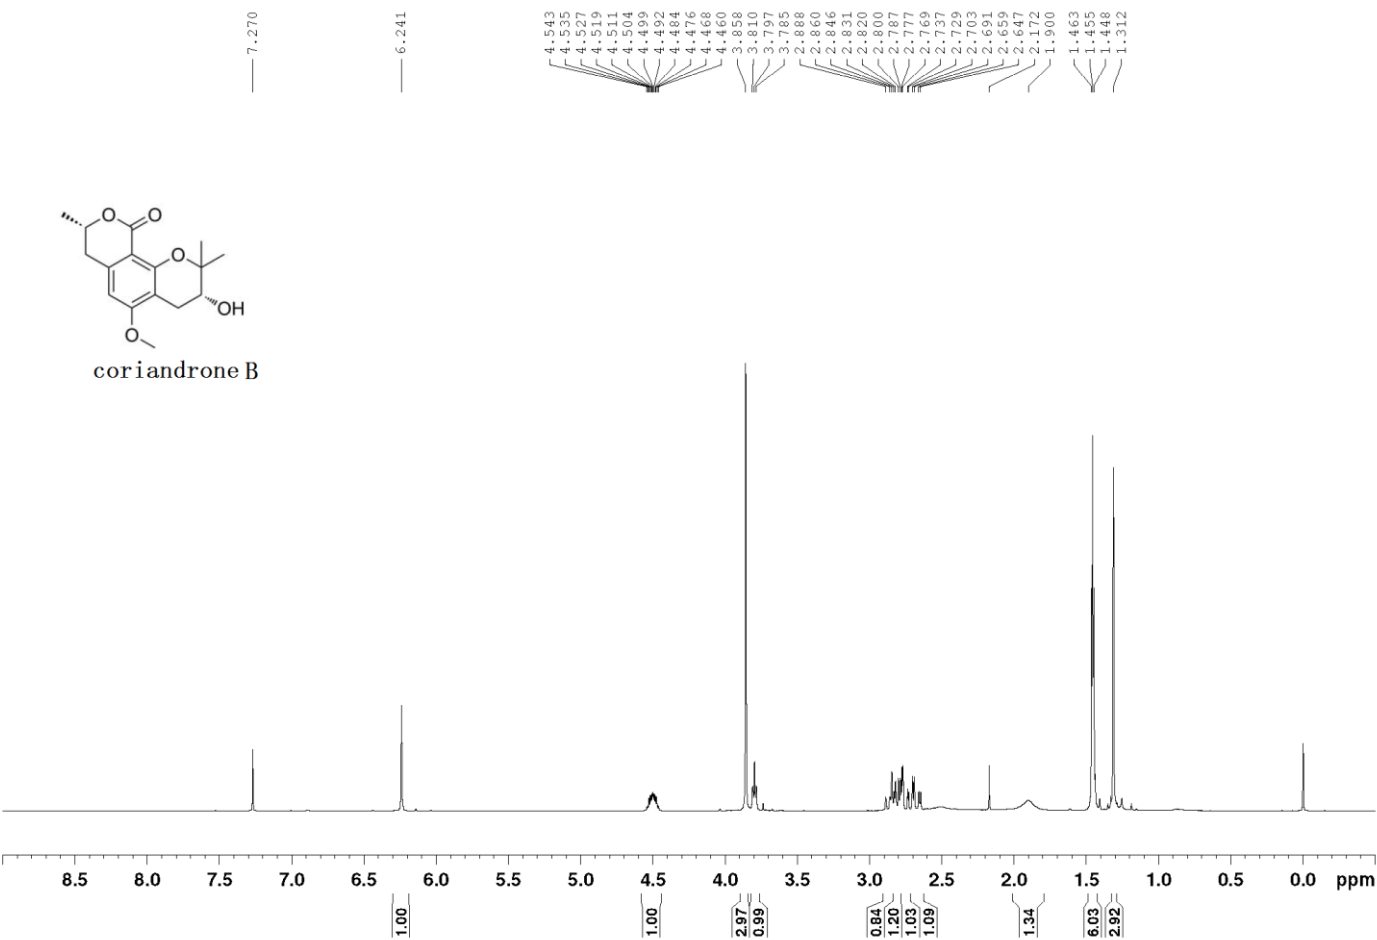

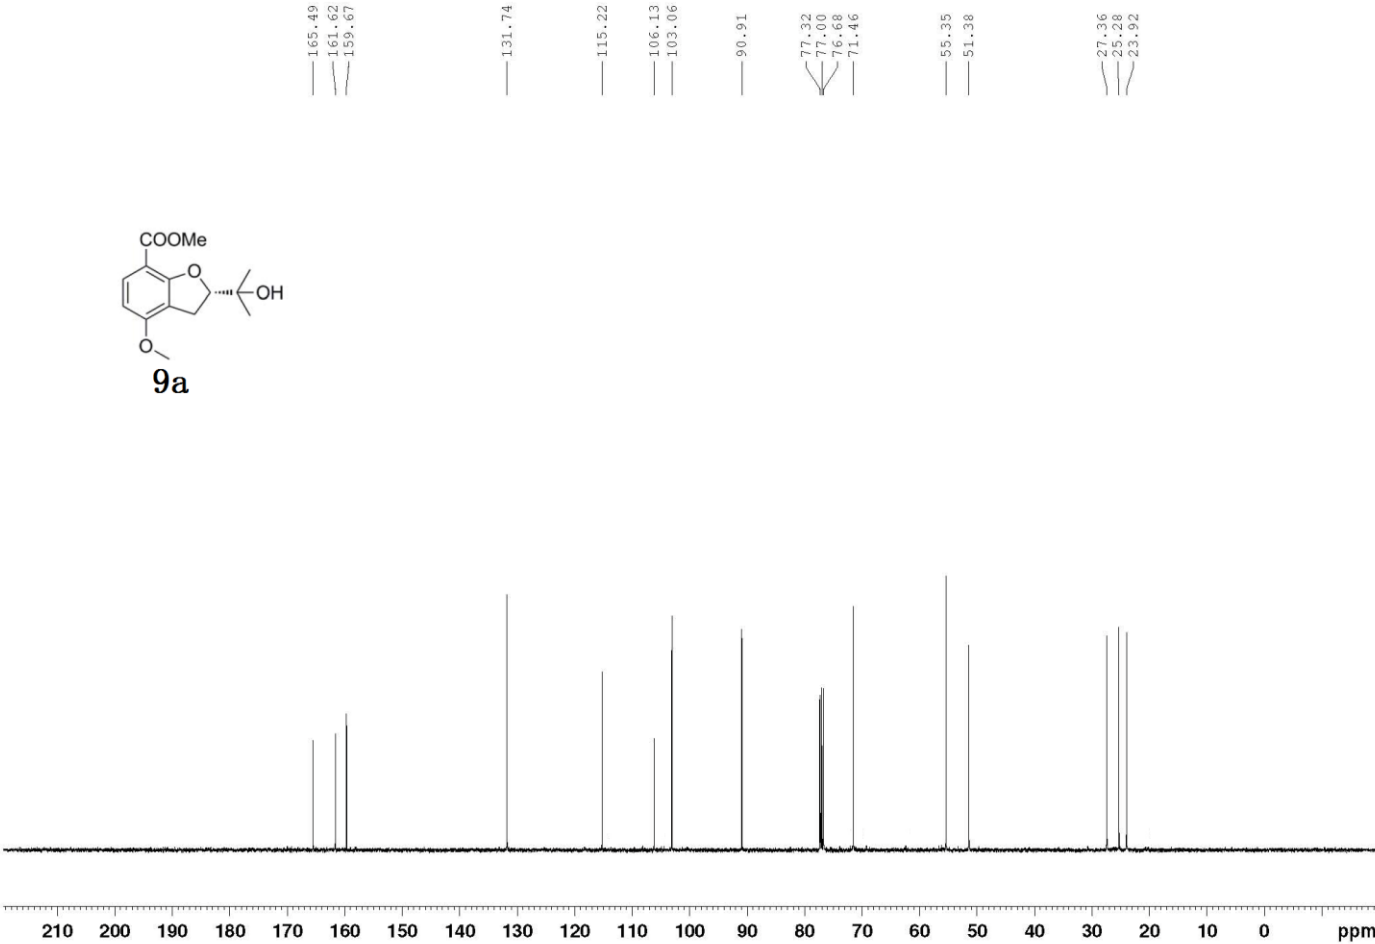

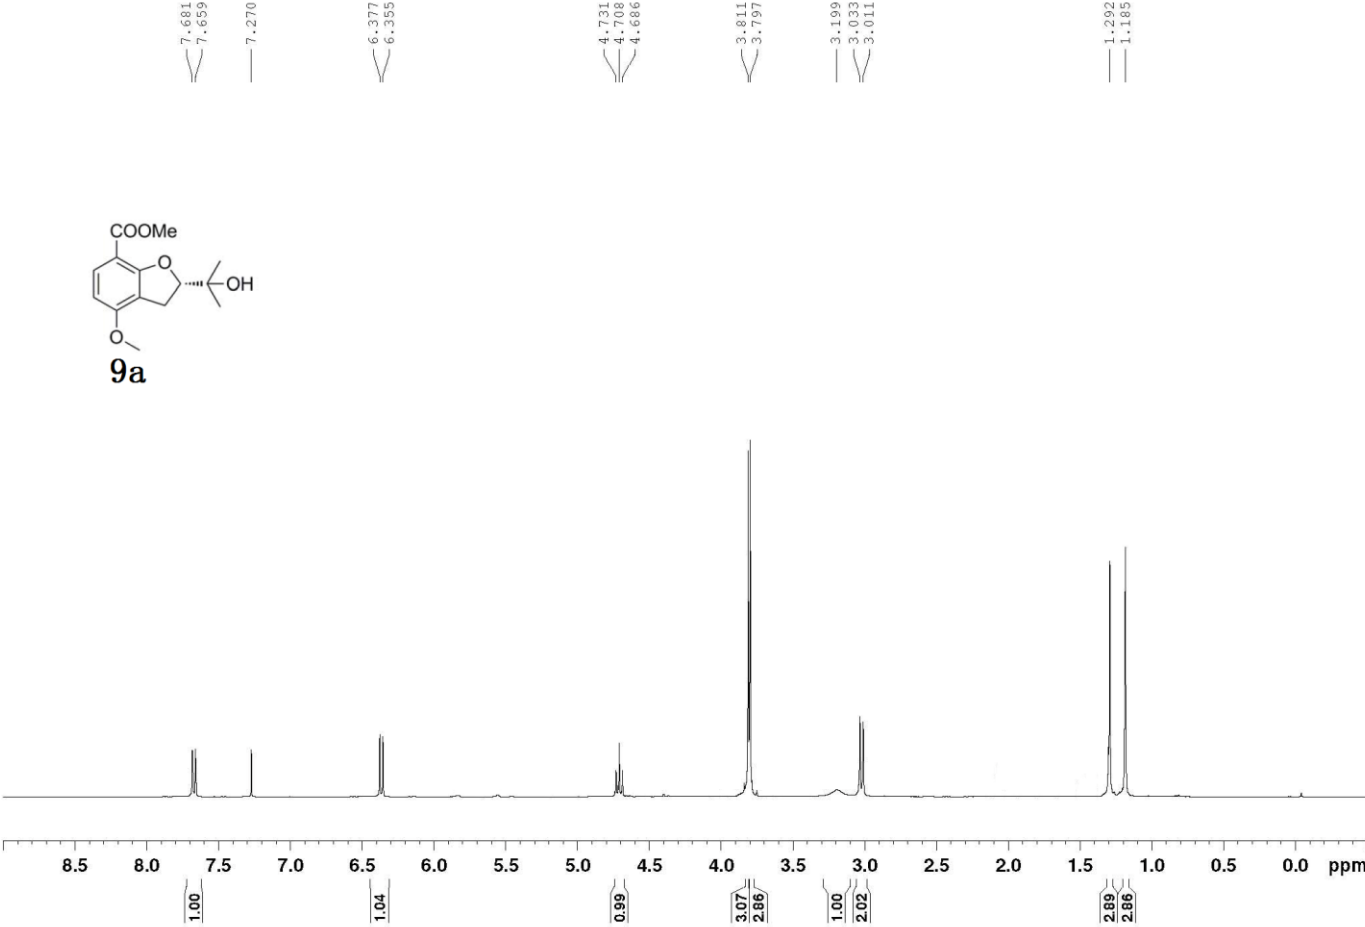

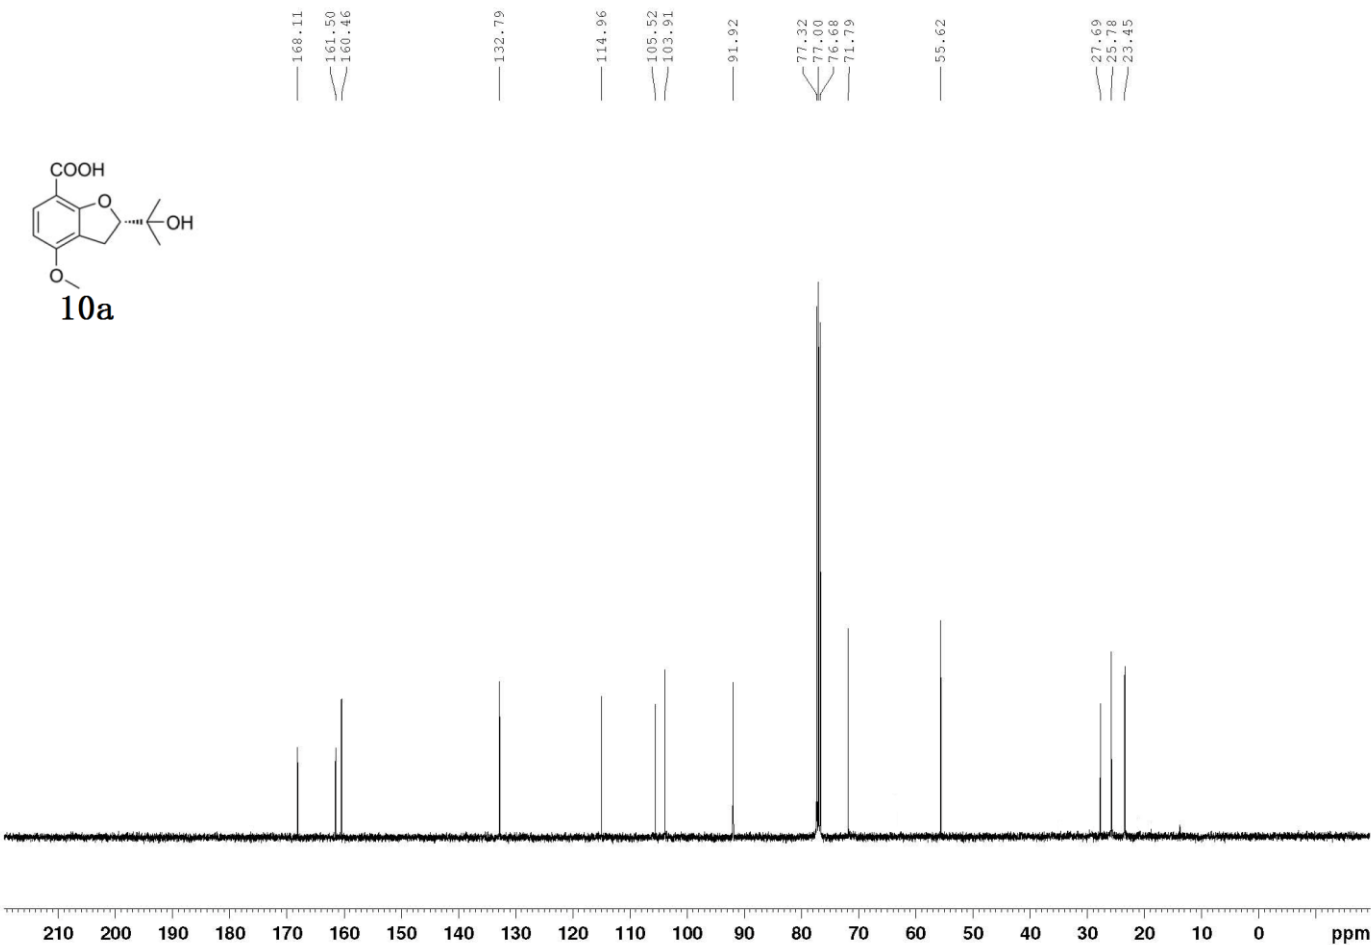

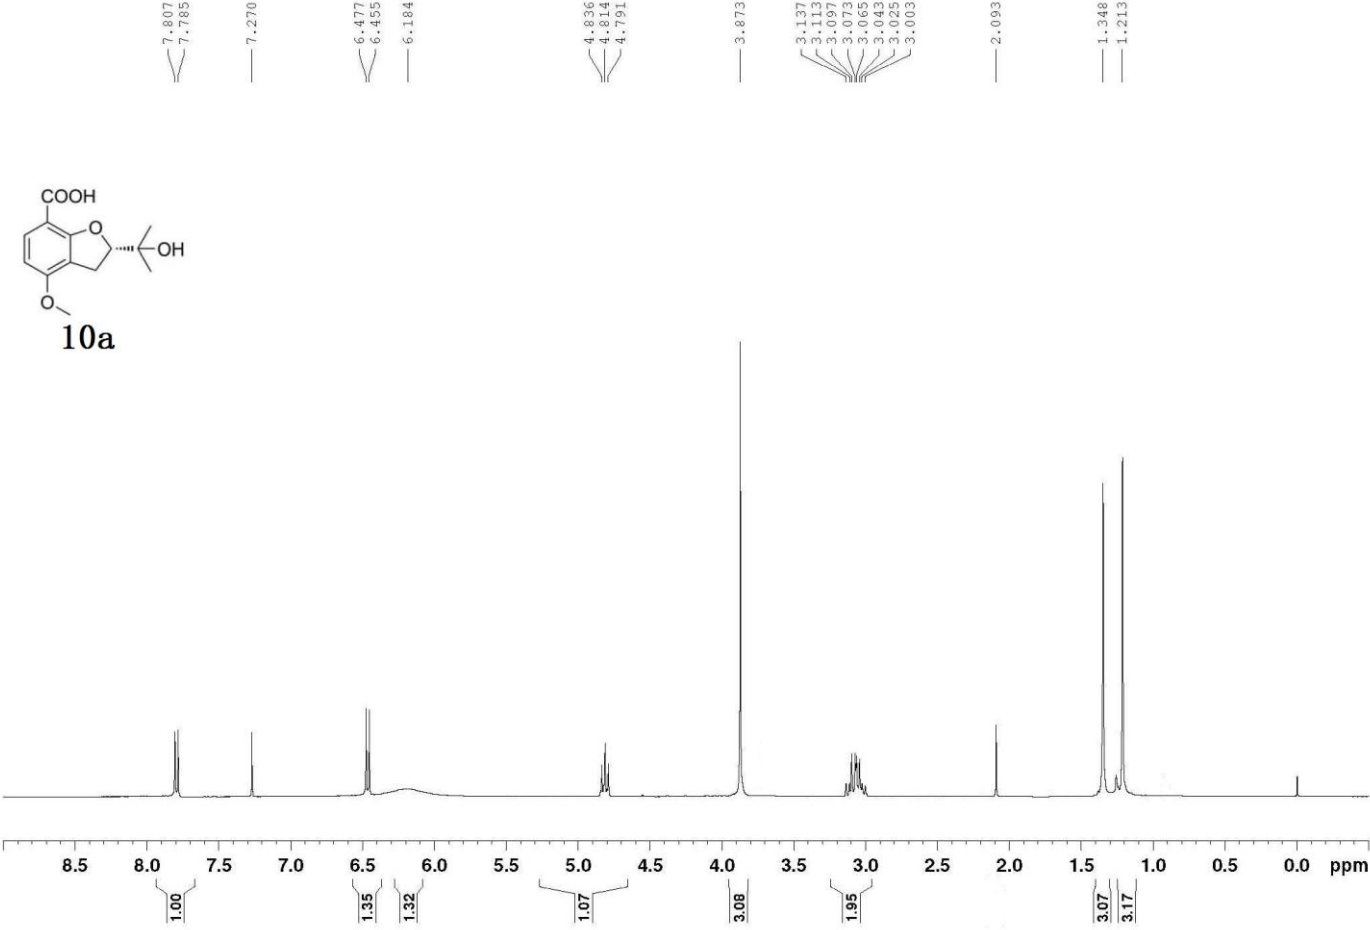

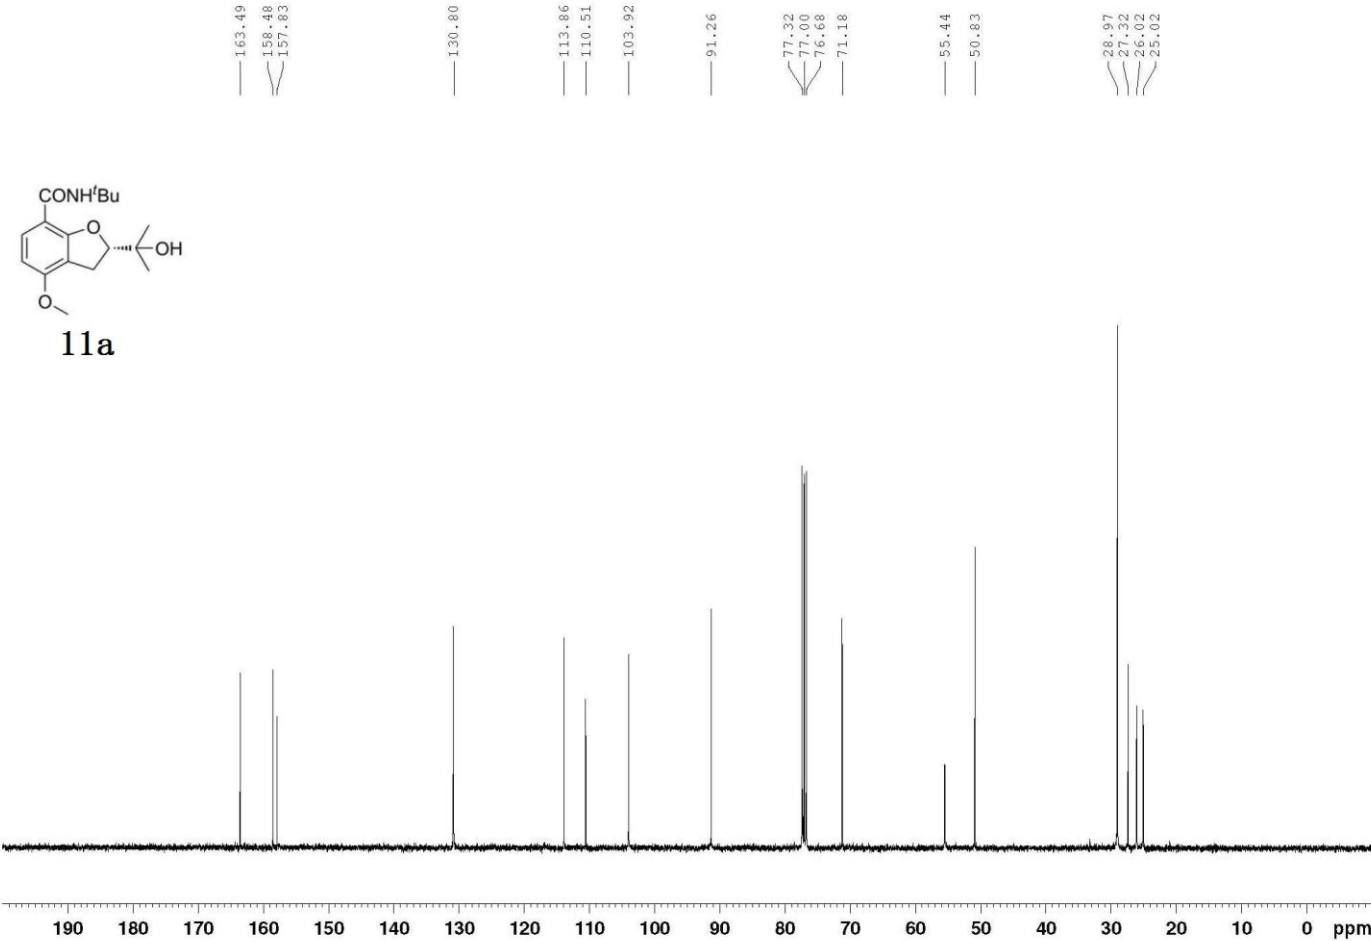

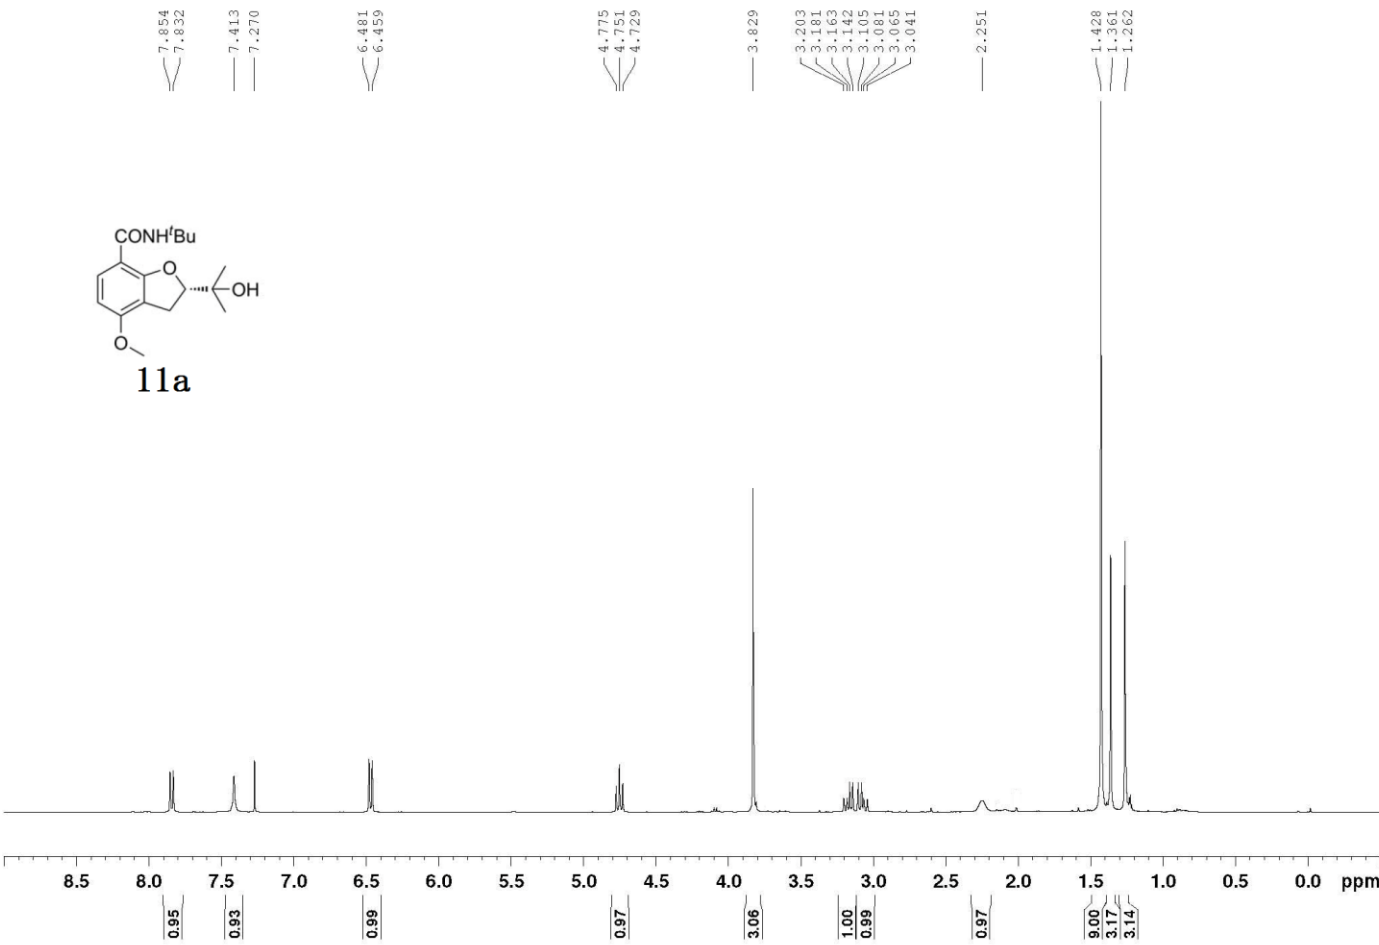

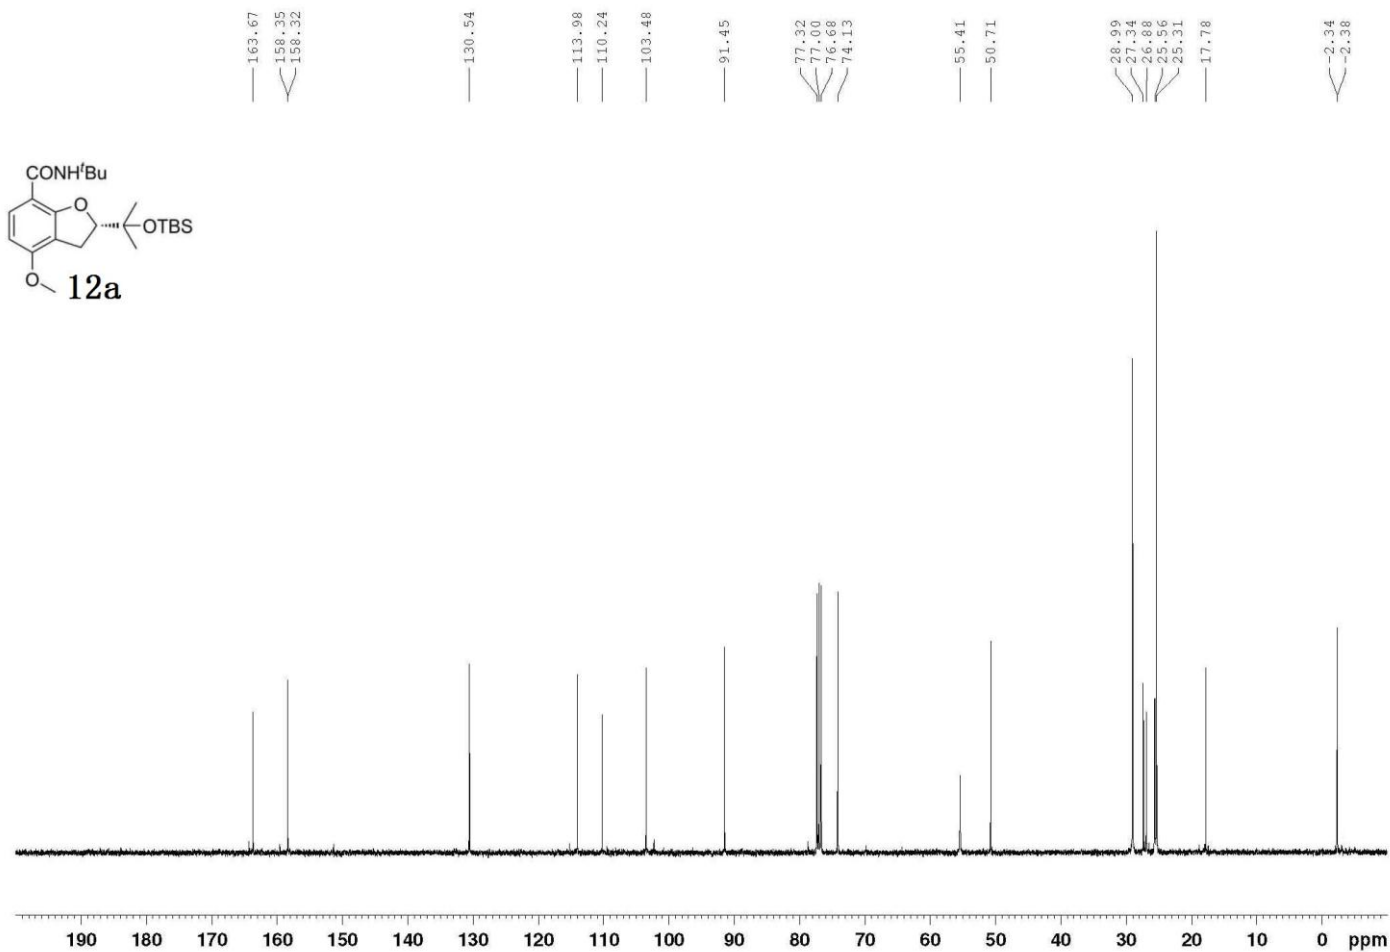



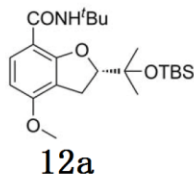

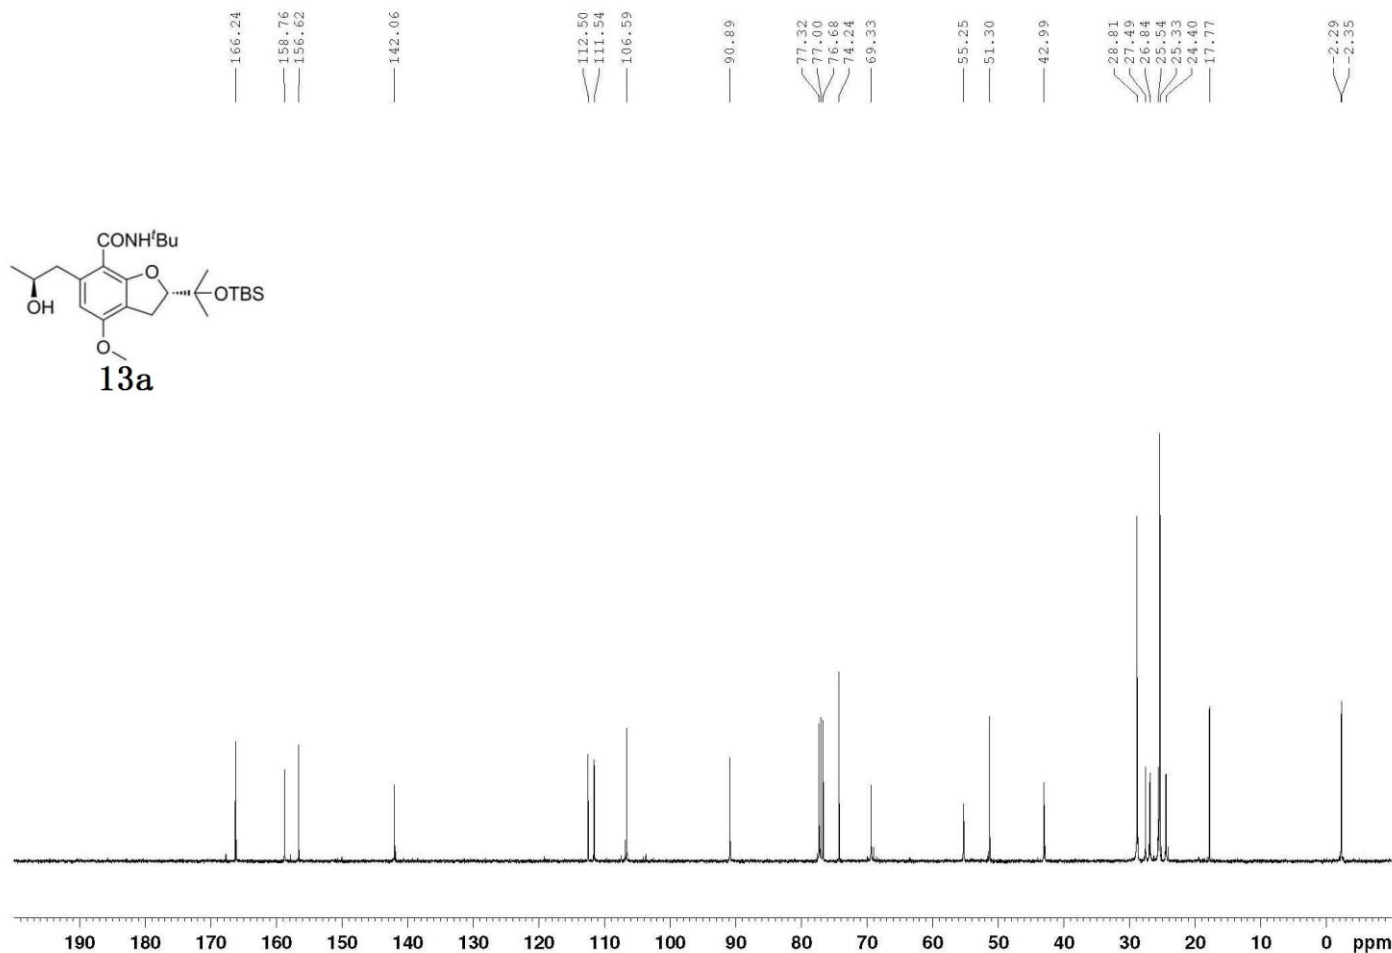

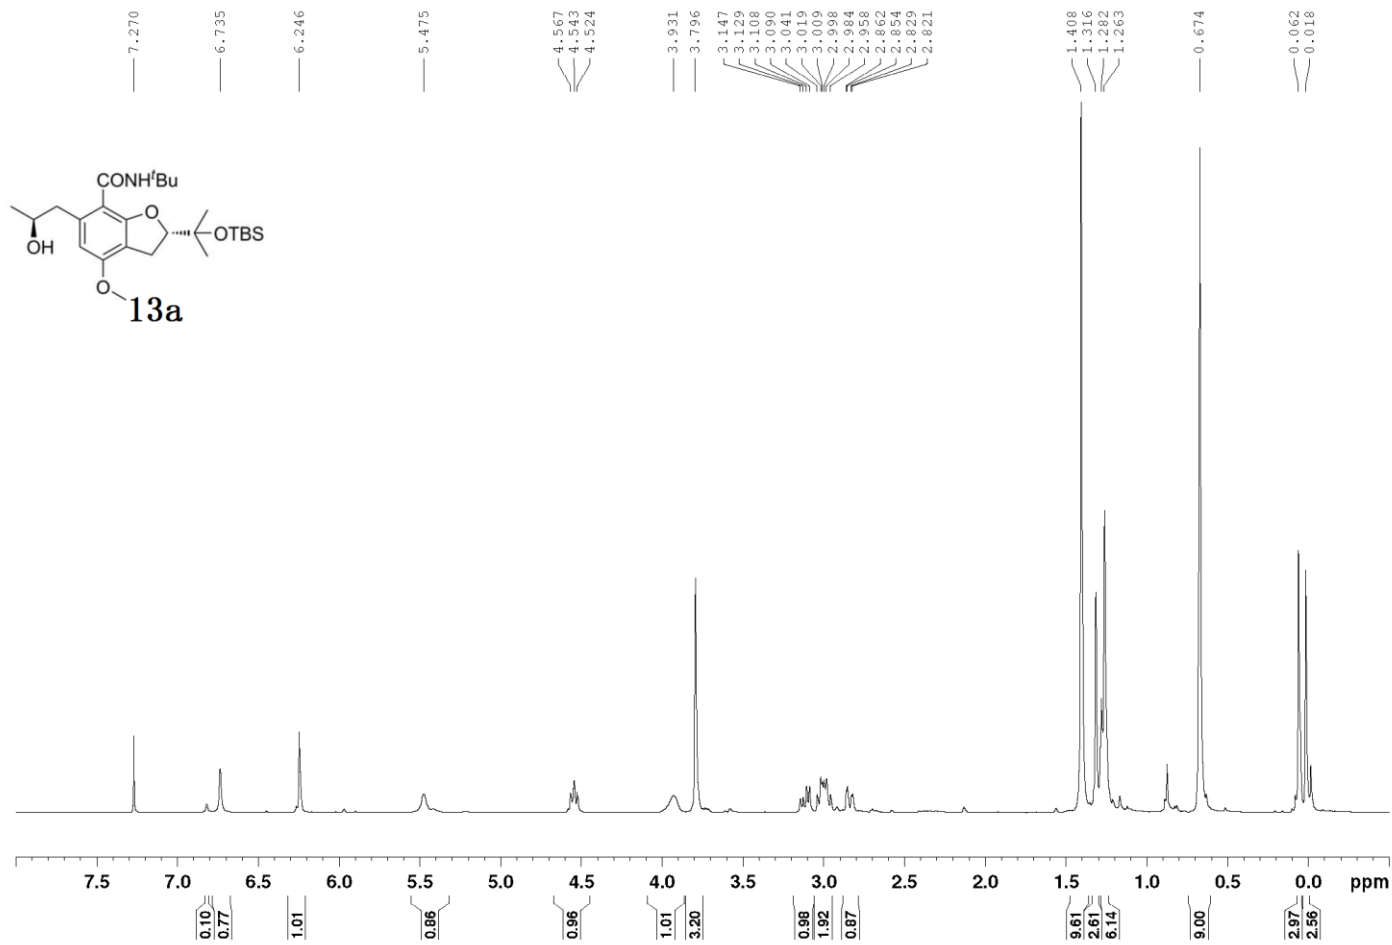

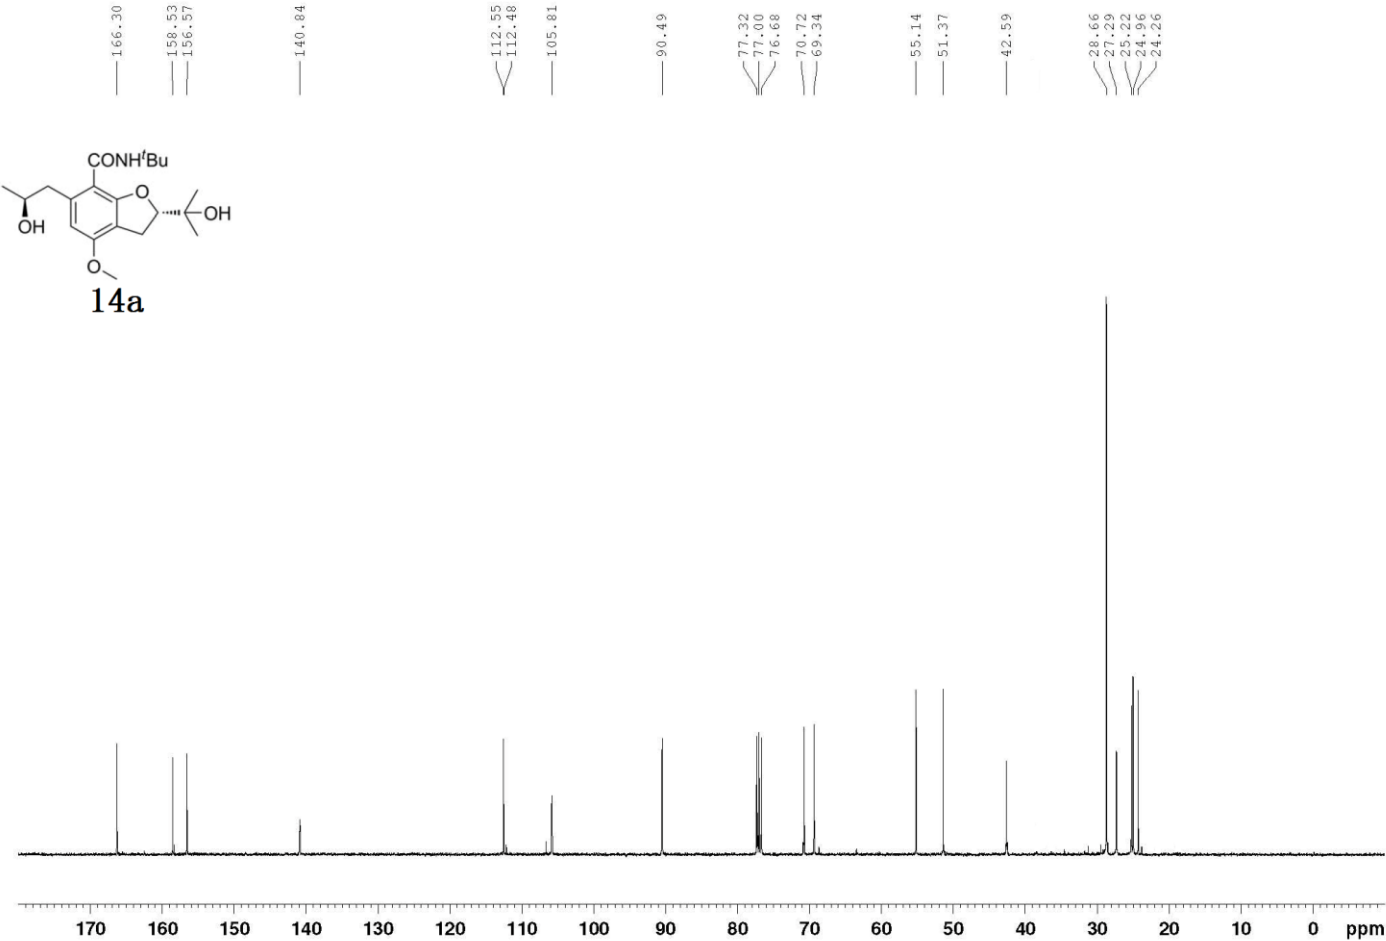

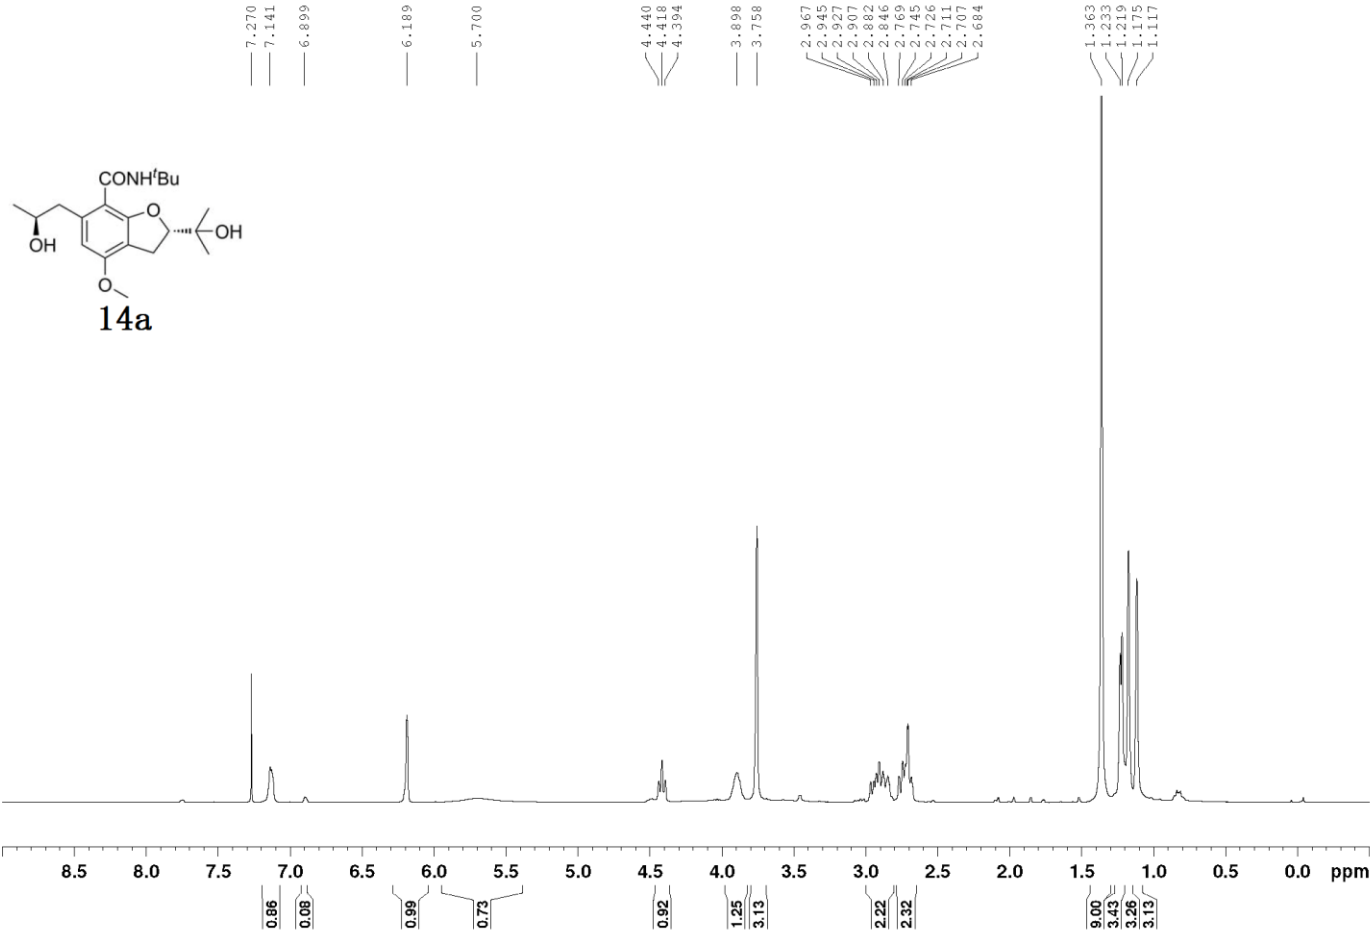

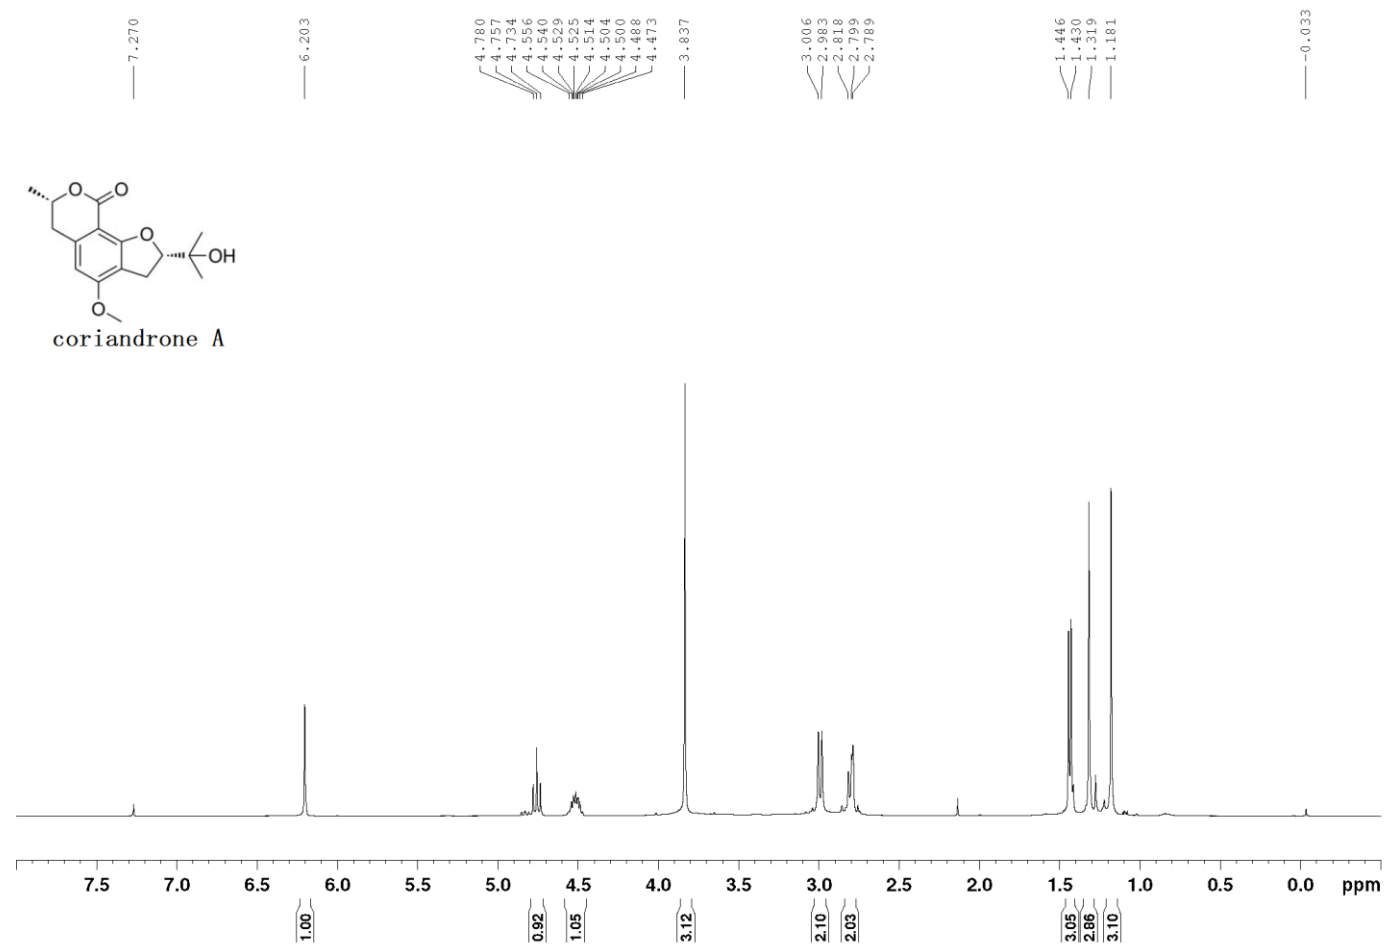

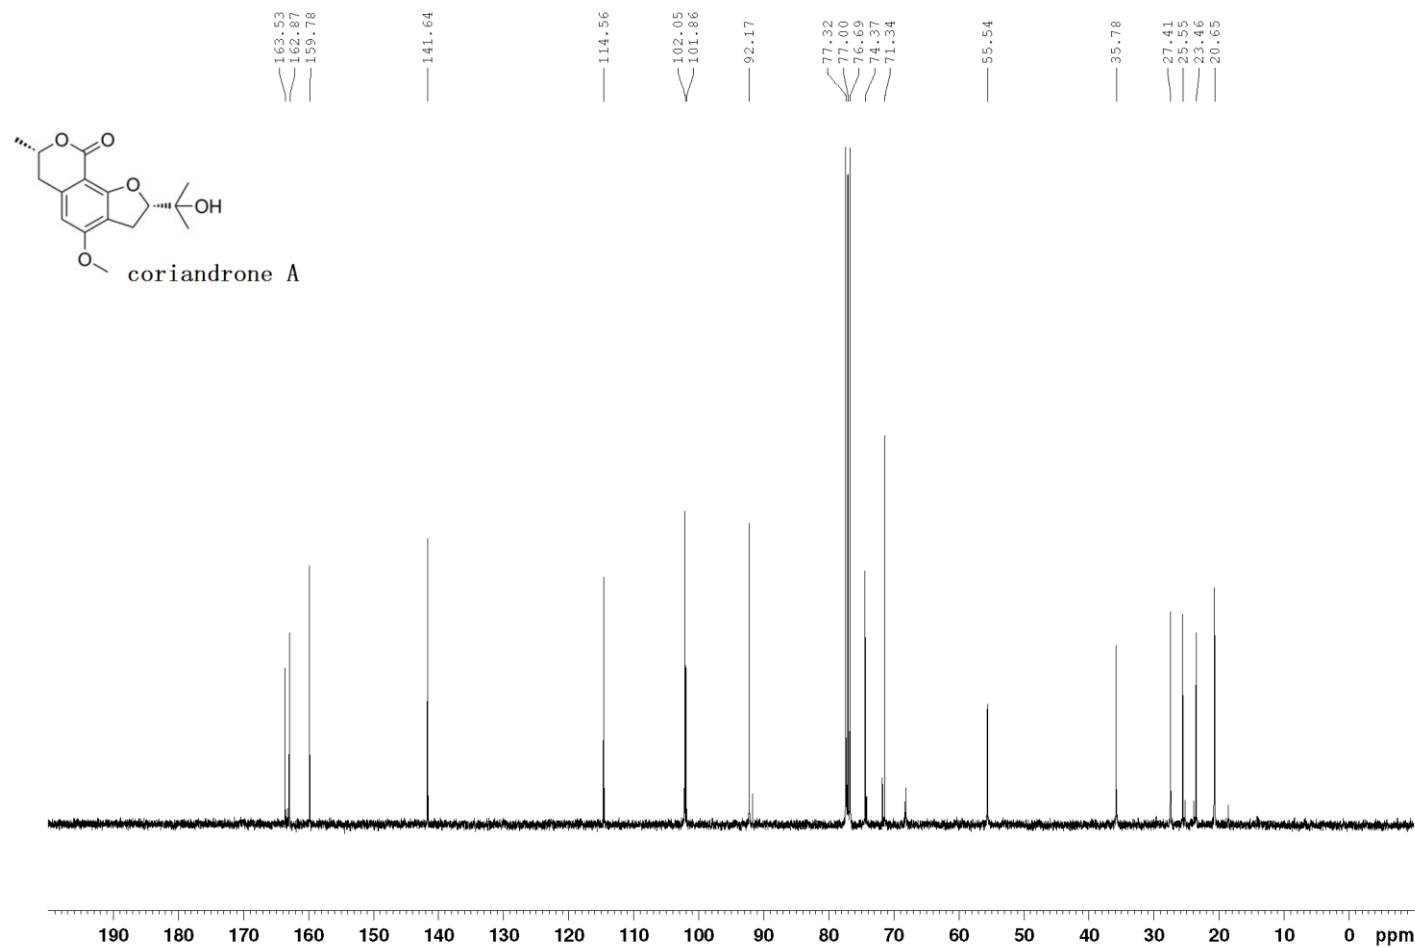

Lanzhou

项目名称: fan  
用户名称: FanChunAn

Breeze<sup>2</sup>  
HPLC System

### 样品信息

|       |                       |         |                    |
|-------|-----------------------|---------|--------------------|
| 样品名称: | wwj xiaoxuan          | 采集者:    | FanChunAn          |
| 样品类型: | 未知                    | 样品组名称:  | ZGB20100908        |
| 瓶号:   | 2:A,7                 | 采集方法组:  | IB3 1ml Hexlpr95v5 |
| 进样次数: | 1                     | 处理方法:   | ZGB05              |
| 进样体积: | 10.00 ul              | 通道名称:   | 236.2 纳米           |
| 运行时间: | 60.0 Minutes          | 处理通道注释: | PDA 236.2 纳米       |
| 采集时间: | 2010/9/8 10:40:37 CST | 色谱柱类型:  | PDA 236.2 纳米       |
| 处理时间: | 2010/9/8 11:39:14 CST |         |                    |

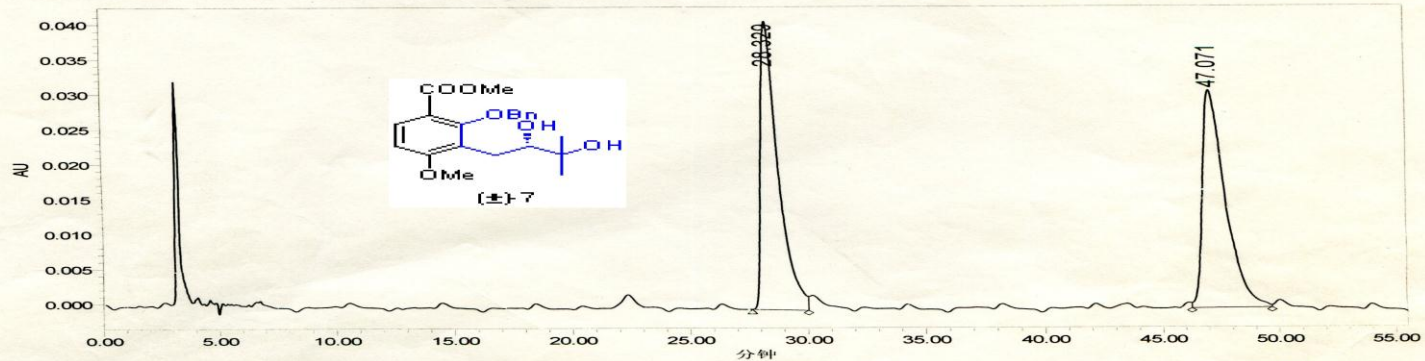

|   | 保留时间<br>(分钟) | 面积<br>(微伏*秒) | % 面积  | 高度<br>(微伏) | % 高度  |
|---|--------------|--------------|-------|------------|-------|
| 1 | 28.329       | 2119102      | 49.94 | 41250      | 57.00 |
| 2 | 47.071       | 2124389      | 50.06 | 31125      | 43.00 |

报告方法: 单个报告 ASC

打印于 11:39:53 PM 2010/9/8

页码: 1 (共计 1)



Lanzhou

项目名称: fan

用户名称: FanChunAn

Breeze<sup>2</sup>  
HPLC System

### 样品信息

|       |                       |         |                    |
|-------|-----------------------|---------|--------------------|
| 样品名称: | wwi shouxing          | 采集者:    | FanChunAn          |
| 样品类型: | 未知                    | 样品组名称:  | ZGB20100908        |
| 瓶号:   | 2:A,8                 | 采集方法组:  | IB3 1ml Hexlpr95v5 |
| 进样次数: | 1                     | 处理方法:   | ZGB05              |
| 进样体积: | 20.00 ul              | 通道名称:   | 236.2 纳米           |
| 运行时间: | 55.0 Minutes          | 处理通道注释: | PDA 236.2 纳米       |
| 采集时间: | 2010/9/8 11:38:08 CST | 色谱柱类型:  | PDA 236.2 纳米       |
| 处理时间: | 2010/9/8 12:36:05 CST |         |                    |

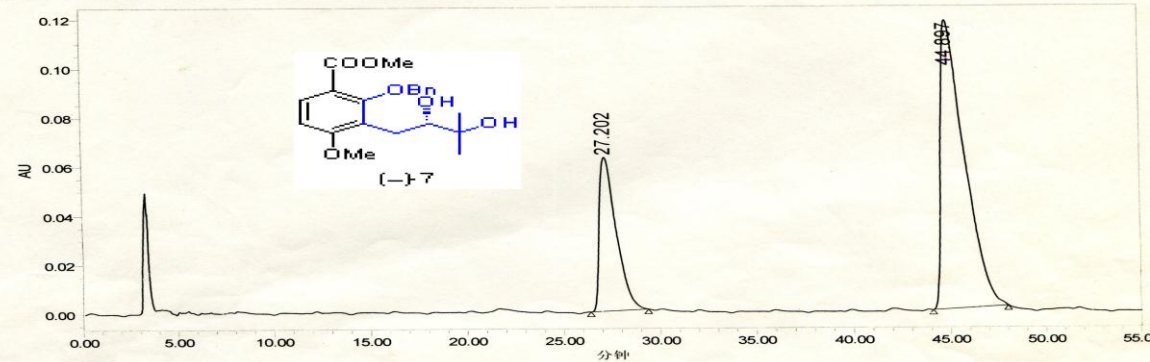

|   | 保留时间<br>(分钟) | 面积<br>(微伏*秒) | % 面积  | 高度<br>(微伏) | % 高度  |
|---|--------------|--------------|-------|------------|-------|
| 1 | 27.202       | 3800799      | 27.52 | 62661      | 34.79 |
| 2 | 44.897       | 10008674     | 72.48 | 117471     | 65.21 |

报告方法: 单个报告 ASC

打印于 12:36:46 P 2010/9/8

页码: 1 (共计 1)

Lanzhou

项目名称: fan  
用户名称: FanChunAn

Breeze<sup>2</sup>  
HPLC System

样品信息

|       |                        |         |                     |
|-------|------------------------|---------|---------------------|
| 样品名称: | wwj201109131           | 采集者:    | FanChunAn           |
| 样品类型: | 未知                     | 样品组名称:  | wwj                 |
| 瓶号:   | 2:E,1                  | 采集方法组:  | IC3 1ml Hexlpr90v10 |
| 进样次数: | 1                      | 处理方法:   | chenpeng            |
| 进样体积: | 15.00 ul               | 通道名称:   | 222.1 纳米            |
| 运行时间: | 35.0 Minutes           | 处理通道注释: | PDA 222.1 纳米        |
| 采集时间: | 2011/9/13 15:42:49 CST | 色谱柱类型:  | PDA 222.1 纳米        |
| 处理时间: | 2011/9/13 17:44:46 CST |         |                     |

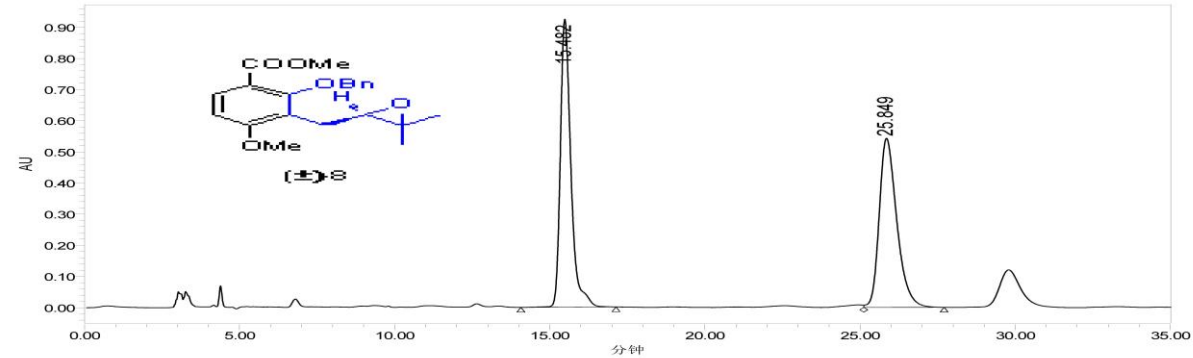

|   | 保留时间<br>(分钟) | 面积<br>(微伏*秒) | % 面积  | 高度<br>(微伏) | % 高度  |
|---|--------------|--------------|-------|------------|-------|
| 1 | 15.482       | 21920300     | 50.64 | 924497     | 63.00 |
| 2 | 25.849       | 21369376     | 49.36 | 542917     | 37.00 |

Lanzhou

项目名称: fan  
用户名称: FanChunAn

Breeze 2  
HPLC System

样品信息

|       |                        |         |                     |
|-------|------------------------|---------|---------------------|
| 样品名称: | wwj201109133           | 采集者:    | FanChunAn           |
| 样品类型: | 未知                     | 样品组名称:  | wwj                 |
| 瓶号:   | 2:E,3                  | 采集方法组:  | IC3 1ml HexIpr90v10 |
| 进样次数: | 1                      | 处理方法:   | chenpeng            |
| 进样体积: | 15.00 ul               | 通道名称:   | 230.0 纳米@2          |
| 运行时间: | 35.0 Minutes           | 处理通道注释: | PDA 230.0 纳米        |
| 采集时间: | 2011/9/13 16:53:37 CST | 色谱柱类型:  | PDA 230.0 纳米        |
| 处理时间: | 2011/9/13 17:49:03 CST |         |                     |

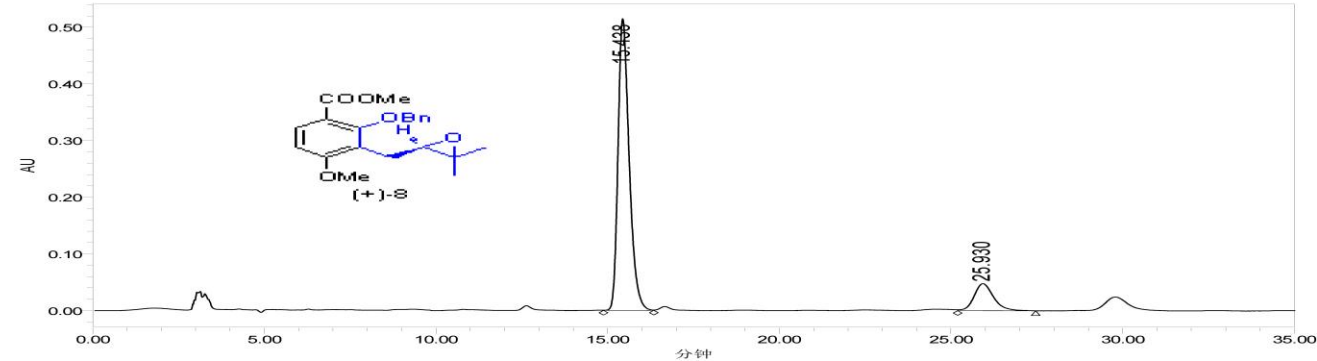

|   | 保留时间<br>(分钟) | 面积<br>(微伏*秒) | % 面积  | 高度<br>(微伏) | % 高度  |
|---|--------------|--------------|-------|------------|-------|
| 1 | 15.438       | 11619883     | 86.11 | 514608     | 91.53 |
| 2 | 25.930       | 1874895      | 13.89 | 47617      | 8.47  |

报告方法: 单个报告 ASC

打印于 17:49:21 PZ2011/9/13

页码: 1 (共计 1)

Lanzhou

项目名称: fan  
用户名称: FanChunAn

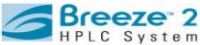

| 样品信息  |                        |         |                     |
|-------|------------------------|---------|---------------------|
| 样品名称: | wwj201109132           | 采集者:    | FanChunAn           |
| 样品类型: | 未知                     | 样品组名称:  | wwj                 |
| 瓶号:   | 2:E,2                  | 采集方法组:  | IC3 1ml Hexlpr90v10 |
| 进样次数: | 1                      | 处理方法:   | chenpeng            |
| 进样体积: | 15.00 ul               | 通道名称:   | 230.0 纳米@2          |
| 运行时间: | 35.0 Minutes           | 处理通道注释: | PDA 230.0 纳米        |
| 采集时间: | 2011/9/13 16:18:13 CST | 色谱柱类型:  | PDA 230.0 纳米        |
| 处理时间: | 2011/9/13 17:47:33 CST |         |                     |

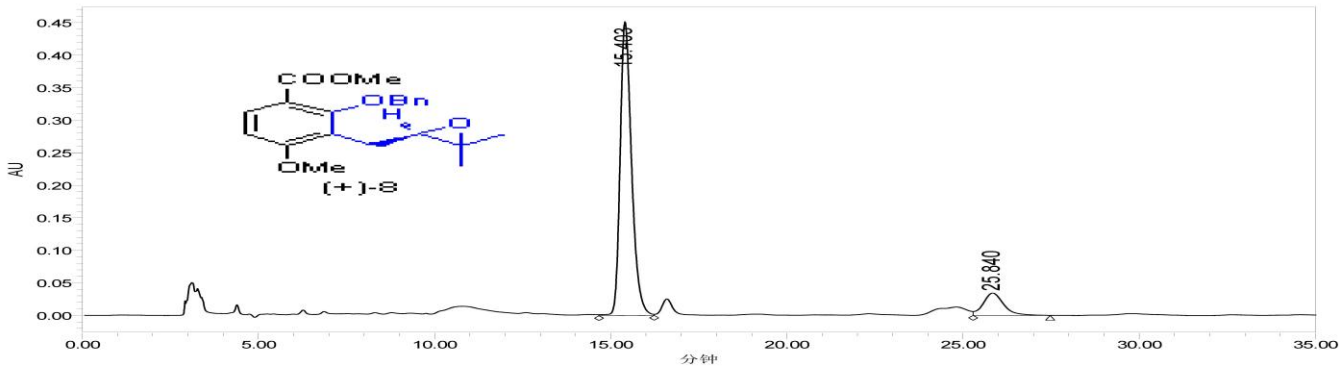

|   | 保留时间<br>(分钟) | 面积<br>(微伏*秒) | % 面积  | 高度<br>(微伏) | % 高度  |
|---|--------------|--------------|-------|------------|-------|
| 1 | 15.403       | 10208634     | 88.04 | 451693     | 92.94 |
| 2 | 25.840       | 1387193      | 11.96 | 34296      | 7.06  |

Lanzhou

项目名称: fan  
用户名称: FanChunAn

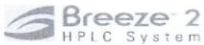

样品信息

|       |                        |         |                     |
|-------|------------------------|---------|---------------------|
| 样品名称: | wwj20110518            | 采集者:    | FanChunAn           |
| 样品类型: | 未知                     | 样品组名称:  | wwj                 |
| 瓶号:   | 1-F,7                  | 采集方法组:  | IC3 1ml Hexlpr90v10 |
| 进样次数: | 1                      | 处理方法:   | chenpeng            |
| 进样体积: | 10.00 ul               | 通道名称:   | 230.0 纳米@2          |
| 运行时间: | 35.0 Minutes           | 处理通道注释: | PDA 230.0 纳米        |
| 采集时间: | 2011/5/18 17:23:53 CST | 色谱柱类型:  | PDA 230.0 纳米        |
| 处理时间: | 2011/5/18 17:58:18 CST |         |                     |

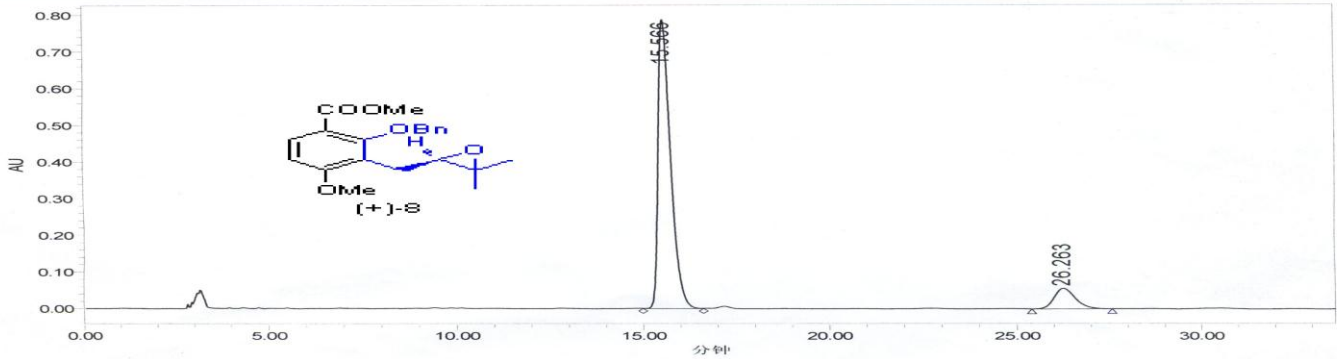

|   | 保留时间<br>(分钟) | 面积<br>(微伏*秒) | % 面积  | 高度<br>(微伏) | % 高度  |
|---|--------------|--------------|-------|------------|-------|
| 1 | 15.566       | 18352585     | 89.29 | 787338     | 93.36 |
| 2 | 26.263       | 2200691      | 10.71 | 55976      | 6.64  |

Lanzhou

项目名称: fan  
用户名称: FanChunAn

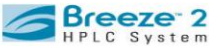

样品信息

|       |                       |         |                    |
|-------|-----------------------|---------|--------------------|
| 样品名称: | wwj201109061          | 采集者:    | FanChunAn          |
| 样品类型: | 未知                    | 样品组名称:  | wwj                |
| 瓶号:   | 2:D,1                 | 采集方法组:  | IC3 1ml Hexlpr97v3 |
| 进样次数: | 1                     | 处理方法:   | wwj                |
| 进样体积: | 15.00 ul              | 通道名称:   | 260.0 纳米           |
| 运行时间: | 60.0 Minutes          | 处理通道注释: | PDA 260.0 纳米       |
| 采集时间: | 2011/9/6 17:26:38 CST | 色谱柱类型:  | PDA 260.0 纳米       |
| 处理时间: | 2011/9/6 19:19:06 CST |         |                    |

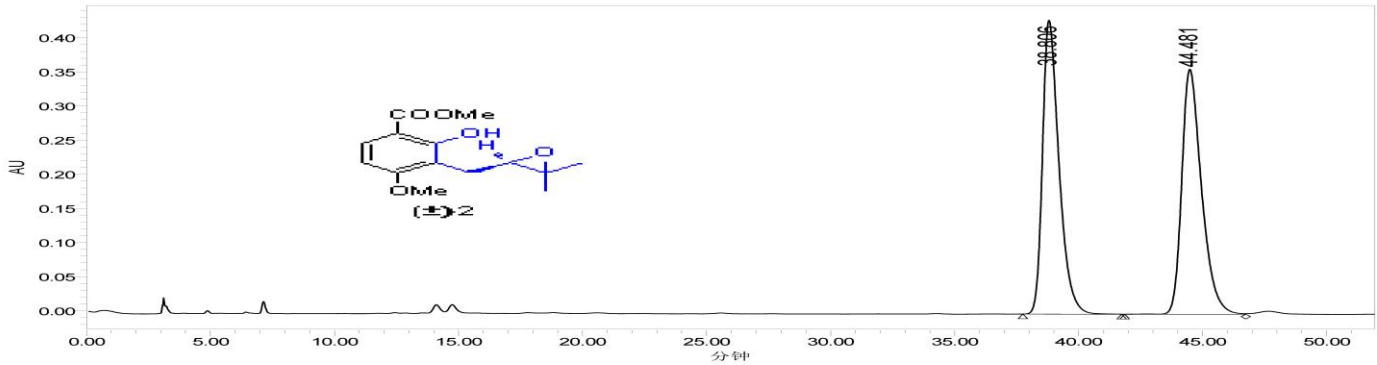

|   | 保留时间<br>(分钟) | 面积<br>(微伏*秒) | % 面积  | 高度<br>(微伏) | % 高度  |
|---|--------------|--------------|-------|------------|-------|
| 1 | 38.806       | 19855064     | 49.98 | 430299     | 54.54 |
| 2 | 44.481       | 19873422     | 50.02 | 358677     | 45.46 |

Lanzhou

项目名称: fan  
用户名称: FanChunAn

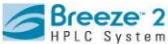

| 样品信息  |                       |         |                    |
|-------|-----------------------|---------|--------------------|
| 样品名称: | wwj201109062          | 采集者:    | FanChunAn          |
| 样品类型: | 未知                    | 样品组名称:  | wwj                |
| 瓶号:   | 2:D,2                 | 采集方法组:  | IC3 1ml Hexlpr97v3 |
| 进样次数: | 1                     | 处理方法:   | wwj                |
| 进样体积: | 15.00 ul              | 通道名称:   | 260.0 纳米           |
| 运行时间: | 52.0 Minutes          | 处理通道注释: | PDA 260.0 纳米       |
| 采集时间: | 2011/9/6 18:19:59 CST | 色谱柱类型:  | PDA 260.0 纳米       |
| 处理时间: | 2011/9/6 19:21:10 CST |         |                    |

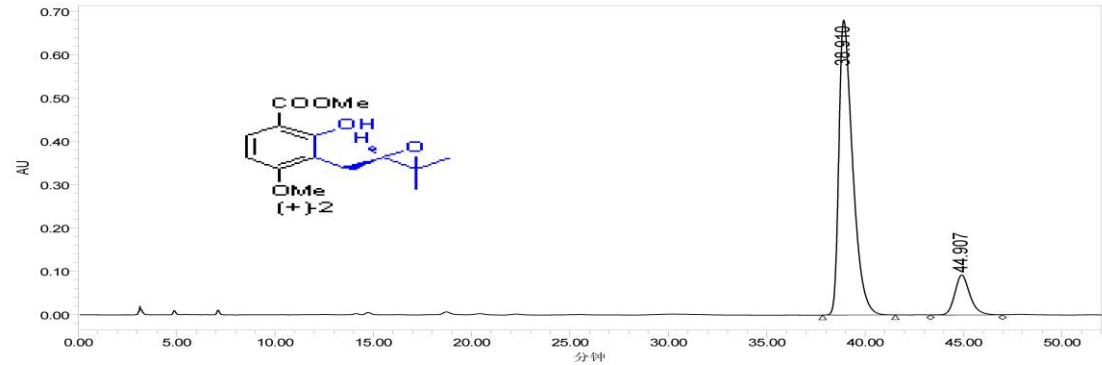

|   | 保留时间<br>(分钟) | 面积<br>(微伏*秒) | % 面积  | 高度<br>(微伏) | % 高度  |
|---|--------------|--------------|-------|------------|-------|
| 1 | 38.910       | 33016039     | 87.08 | 680720     | 88.07 |
| 2 | 44.907       | 4897484      | 12.92 | 92184      | 11.93 |



Lanzhou

项目名称: fan  
用户名称: FanChunAn

Breeze<sup>2</sup>  
HPLC System

### 样品信息

|       |                         |         |                      |
|-------|-------------------------|---------|----------------------|
| 样品名称: | zgb2011.11.19-1         | 采集者:    | FanChunAn            |
| 样品类型: | 未知                      | 样品组名称:  | zgb                  |
| 瓶号:   | 1:A,1                   | 采集方法组:  | IA3 1ml Hexvlpr85v15 |
| 进样次数: | 1                       | 处理方法:   | zgb                  |
| 进样体积: | 15.00 ul                | 通道名称:   | 256.0 纳米             |
| 运行时间: | 60.0 Minutes            | 处理通道注释: | PDA 256.0 纳米         |
| 采集时间: | 2011/11/19 16:24:27 CST | 色谱柱类型:  | PDA 256.0 纳米         |
| 处理时间: | 2011/11/19 16:37:04 CST |         |                      |

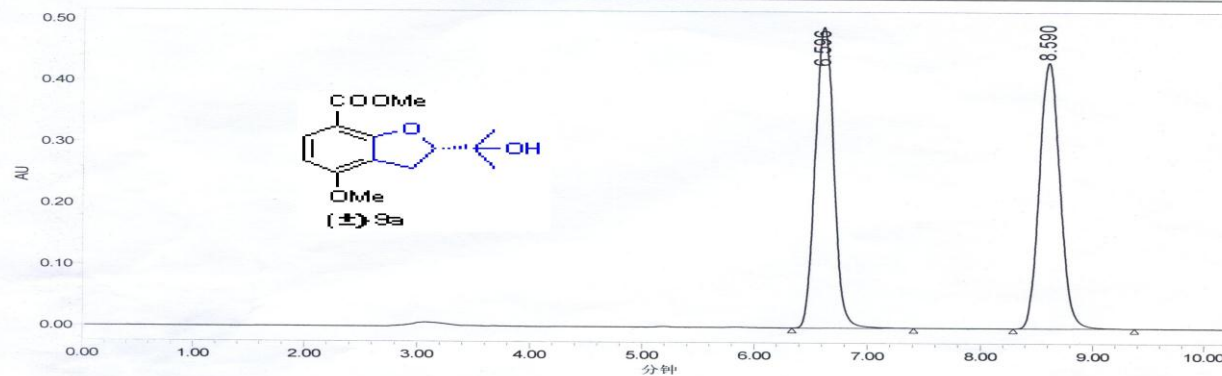

|   | 保留时间<br>(分钟) | 面积<br>(微伏*秒) | % 面积  | 高度<br>(微伏) | % 高度  |
|---|--------------|--------------|-------|------------|-------|
| 1 | 6.596        | 5622241      | 50.10 | 489950     | 53.10 |
| 2 | 8.590        | 5600420      | 49.90 | 432798     | 46.90 |

报告方法: 单个报告 ASC

打印于 16:37:48 P 2011/11/19

页码: 1 (共计 1)



Lanzhou  
项目名称: fan  
用户名称: FanChunAn

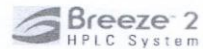

样品信息

|       |                         |         |                      |
|-------|-------------------------|---------|----------------------|
| 样品名称: | zqb2011.11.19-2         | 采集者:    | FanChunAn            |
| 样品类型: | 未知                      | 样品组名称:  | zgb                  |
| 瓶号:   | 1:A,2                   | 采集方法组:  | IA3 1ml Hexvlpr85v15 |
| 进样次数: | 1                       | 处理方法:   | zgb                  |
| 进样体积: | 15.00 ul                | 通道名称:   | 256.0 纳米             |
| 运行时间: | 13.0 Minutes            | 处理通道注释: | PDA 256.0 纳米         |
| 采集时间: | 2011/11/19 16:35:34 CST | 色谱柱类型:  | PDA 256.0 纳米         |
| 处理时间: | 2011/11/19 16:47:07 CST |         |                      |

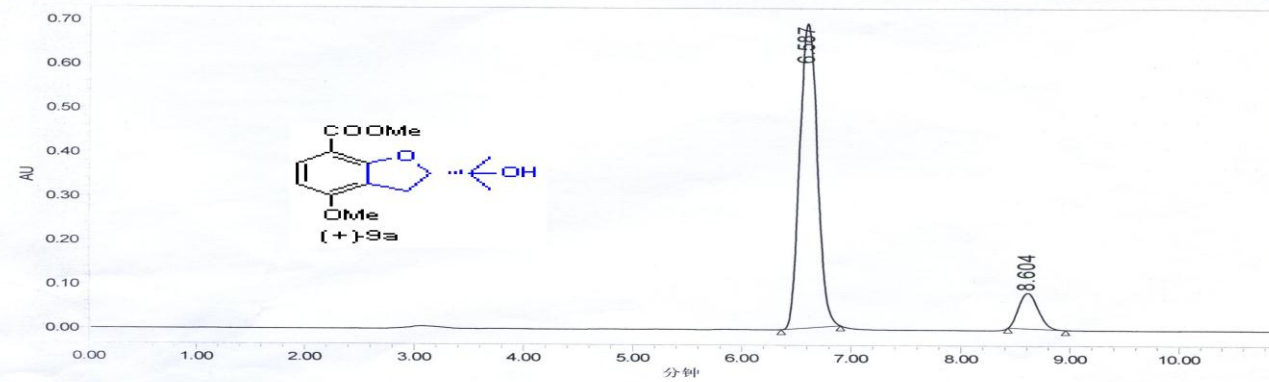

|   | 保留时间<br>(分钟) | 面积<br>(微伏*秒) | % 面积  | 高度<br>(微伏) | % 高度  |
|---|--------------|--------------|-------|------------|-------|
| 1 | 6.587        | 7772003      | 88.69 | 689354     | 89.51 |
| 2 | 8.604        | 990658       | 11.31 | 80756      | 10.49 |
